# Supplementary material
Source: PubMed Central journal article supplement (PMC3326604)
Supplement: NIHMS359469-supplement-1_si_001.pdf [file NIHMS359469-supplement-1_si_001.pdf]

# A Single Site mutation (F429H) Converts the Enzyme CYP 2B4 into a Heme Oxygenase: A QM/MM Study

Dandamudi Usharani,<sup>†</sup> Costantino Zazza,<sup>‡</sup> Wenzhen Lai,<sup>†,‡</sup> Mukesh Chourasia,<sup>†</sup> Lucy Waskell,<sup>§\*</sup> Sason Shaik<sup>†\*</sup>

<sup>†</sup>Institute of Chemistry and the Lise-Meitner-Minerva Center for Computational Quantum Chemistry, The Hebrew University of Jerusalem, 91904 Jerusalem, Israel

<sup>‡</sup>Centro di Elaborazione dell'Informazione e del Calcolo (CEIC) della Scuola Normale Superiore di Pisa Palazzo del Castelletto, via del Castelletto, 11, 56126 Pisa, Italy

<sup>§</sup>University of Michigan and VA Medical Research Center, 2215 Fuller Road, Ann Arbor, MI 48105, USA

## Supporting Information

### Table of Contents:

|                                                                                                           |                |
|-----------------------------------------------------------------------------------------------------------|----------------|
| <b>1. Computational Details.....</b>                                                                      | <b>S2-S8</b>   |
| (a) Setup of the system                                                                                   |                |
| (b) Molecular dynamics and topology of benzphetamine                                                      |                |
| (c) Substrate docking                                                                                     |                |
| (d) <a href="#">Snapshots details</a>                                                                     |                |
| (e) The QM region                                                                                         |                |
| (f) The QM/MM region                                                                                      |                |
| (g) QM/MM methodology and software                                                                        |                |
| (h) <a href="#">Intrinsic Protein Electric Field Calculations</a>                                         |                |
| (i) Full references                                                                                       |                |
| <b>2. Proton delivery mechanism of 2B4 wild (WT) and F429H mutant (MT) type in various snapshots.....</b> | <b>S9-S20</b>  |
| (a) QM and QM/MM relative energies                                                                        |                |
| (b) Spin density distributions of key intermediates                                                       |                |
| (c) Geometries of key intermediates                                                                       |                |
| <b>3. Cartesian coordinates of the QM region.....</b>                                                     | <b>S21-S57</b> |

## 1. Computational Details:

**(a) Setup of the system:** Following the QM/MM protocols developed in previous studies,<sup>1</sup> the initial structure of CYP 2B4 is taken from the PDB file 1SUO. We first added the missing hydrogen atoms and determined the protonation states for all acidic, basic and His residues using Propka 2.0<sup>2</sup> and by careful inspection of the environment. All acidic and basic residues were deprotonated. Except His252, all remaining histidines (His226, His285, His335, His354, His269, His397, His412, His429, His231, His284, His319) were singly protonated. Cpd 0 model was built by replacing the inhibitor in 1SUO by O-OH.

After adding the hydrogen atoms, the protein structure was minimized by the adopted Newton Raphson method implemented in CHARMM.<sup>3</sup> Benzphetamine was then docked into the protein. Subsequently, a 16Å solvent layer was added to the substrate-free and the substrate-docked CYP 2B4 wild type (WT) proteins. These solvated enzymes were then relaxed<sup>1</sup> by a series of energy minimizations and molecular dynamics of the inner solvent layer with the CHARMM force field<sup>4</sup> using CHARMM.

**(b) Molecular dynamics:** Initially we performed a short molecular dynamics (MD) run of 300ps, for the WT protein (with and without substrate) by keeping the coordinates of Cpd 0 and the outer 8Å water layer fixed. To ascertain the substrate conformations, the MD run of the docked substrate 2B4 was extended to 1ns. The single residue replacement of Phe429 to His from these short MD run snapshots did not impart quantitative differences on the O-OH cleavage mechanisms. Hence, we also performed a long time MD simulations, wherein we propagated the trajectory up to 60 ns for both WT and the F429H mutant (MT) enzyme without substrate. Here we started from the 46ps snapshot, of the short MD, and gradually heated the protein from 50K to 298K in a canonical (i.e. NVT) ensemble applying an integration step of 2 fs. The trajectories were relaxed all degrees of freedom using Gromacs<sup>5</sup> and Gromos96 force field,<sup>6</sup> we then analyzed two classical trajectories in physiological conditions with the aim to characterize local conformational changes occurring in the WT and MT reaction pocket.

**Topology of the benzphetamine substrate:** As benzphetamine is not among the predefined residues of the CHARMM library we assigned atom types according to CHARMM conventions, which implicitly define most of the force field terms. The missing parameters assigned from corresponding predefined parameters in CHARMM library.

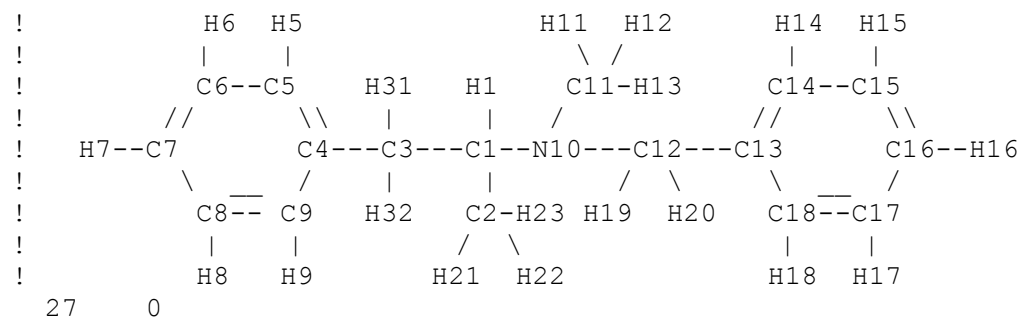

```

RESI RES      0.00000
GROUP
ATOM H6  HP    0.120436      ATOM H20 HA    0.077670
ATOM C1  CT1  0.424968      ATOM C7  CA   -0.134031      ATOM C13 CA    0.028623
ATOM H1  HA    0.033312      ATOM H7  HP    0.122021      ATOM C14 CA   -0.121855
ATOM C2  CT3  -0.539023      ATOM C8  CA   -0.124445      ATOM H14 HP    0.110189
ATOM H21 HA    0.125235      ATOM H8  HP    0.121176      ATOM C15 CA   -0.130338
ATOM H22 HA    0.144348      ATOM C9  CA   -0.174008      ATOM H15 HP    0.116771
ATOM H23 HA    0.141227      ATOM H9  HP    0.121387      ATOM C16 CA   -0.110086
ATOM C3  CT2  -0.345261      ATOM N10 NC2 -0.349897      ATOM H16 HP    0.121427
ATOM H31 HA    0.111527      ATOM C11 CT3 -0.229267      ATOM C17 CA   -0.177701
ATOM H32 HA    0.112546      ATOM H11 HA    0.110700      ATOM H17 HP    0.136327
ATOM C4  CA    0.141398      ATOM H12 HA    0.072437      ATOM C18 CA   -0.064566
ATOM C5  CA   -0.187924      ATOM H13 HA    0.112071      ATOM H18 HP    0.099941
ATOM H5  HP    0.122743      ATOM C12 CT2 -0.160861
ATOM C6  CA   -0.118449      ATOM H19 HA    0.139233
BOND N10 C1    N10 C11    N10 C12    C1 H1    C1 C2
BOND C1 C3    C2 H21    C2 H22    C2 H23    C3 H31
BOND C3 H32    C3 C4    C4 C9    C5 H5
BOND C5 C6    C6 H6    C7 H7    C7 C8
BOND C8 H8    C9 H9    C11 H11    C11 H12
BOND C11 H13    C12 H19    C12 H20    C12 C13
BOND C13 C18    C14 H14    C14 C15    C15 H15
BOND C16 H16    C16 C17    C17 H17    C18 H18
DOUBLE C4 C5    C6 C7    C8 C9
DOUBLE C13 C14    C15 C16    C17 C18
IMPH C4 C9 C5 C3    C5 C4 C6 H5    C6 C5 C7 H6
IMPH C7 C6 C8 H7    C8 C7 C9 H8    C9 C4 C8 H9
IMPH C13 C18 C14 C12    C14 C13 C15 H14    C15 C14 C16 H15
IMPH C16 C15 C17 H16    C17 C16 C18 H17    C18 C13 C17 H18
ICC11 N10 C1 C2    1.4599 114.1780 -66.7054 110.6907 1.5245
ICC11 N10 C1 H1    1.4599 114.1780 177.9939 105.1699 1.0955
ICC11 N10 C1 C3    1.4599 114.1780 60.4650 114.9139 1.5446
ICC12 N10 C1 H1    1.4644 113.1008 51.6286 105.1699 1.0955
ICC12 N10 C11 H13  1.4644 109.6850 -177.0580 110.2011 1.0911
ICC1 N10 C11 H11   1.4734 114.1780 172.7082 108.5559 1.0941
ICC1 N10 C11 H12   1.4734 114.1780 -67.3615 113.7243 1.1034
ICC1 N10 C12 C13   1.4734 113.1008 -56.2535 111.9207 1.5066
ICC1 N10 C12 H19   1.4734 113.1008 -175.9631 106.6729 1.0991
ICC1 N10 C12 H20   1.4734 113.1008 67.7559 113.0755 1.1065
ICC3 C1 C2 H23    1.5446 111.3326 63.4023 109.9333 1.0934

```

IC N10 C1 C2 H21 1.4734 110.6907 -47.6900 109.7321 1.0931  
 IC N10 C1 C2 H22 1.4734 110.6907 73.0695 112.0356 1.0946  
 IC N10 C1 C3 C4 1.4734 114.9139 165.6758 111.3702 1.5056  
 IC N10 C1 C3 H31 1.4734 114.9139 44.8708 109.5807 1.0981  
 IC N10 C1 C3 H32 1.4734 114.9139 -72.3088 109.9556 1.0976  
 IC C1 C3 C4 C5 1.5446 111.3702 107.5672 121.6285 1.3997  
 IC C1 C3 C4 C9 1.5446 111.3702 -70.3912 119.7435 1.4037  
 IC C5 C9 \*C4 C3 1.3997 118.5974 178.0201 119.7435 1.5056  
 IC C3 C4 C5 C6 1.5056 121.6285 -178.3023 120.8560 1.3976  
 IC C3 C4 C5 H5 1.5056 121.6285 2.0696 119.3755 1.0895  
 IC C6 C4 \*C5 H5 1.3976 120.8560 -179.6280 119.3755 1.0895  
 IC C3 C4 C9 C8 1.5056 119.7435 178.3467 120.6934 1.3953  
 IC C3 C4 C9 H9 1.5056 119.7435 -2.0891 119.4182 1.0897  
 IC C8 C4 \*C9 H9 1.3953 120.6934 179.5642 119.4182 1.0897  
 IC C4 C5 C6 C7 1.3997 120.8560 0.2478 120.0493 1.3962  
 IC C4 C5 C6 H6 1.3997 120.8560 -179.7411 119.7998 1.0872  
 IC C7 C5 \*C6 H6 1.3962 120.0493 -179.9888 119.7998 1.0872  
 IC C5 C6 C7 C8 1.3976 120.0493 -0.1717 119.5998 1.3969  
 IC C5 C6 C7 H7 1.3976 120.0493 -179.9595 120.1440 1.0872  
 IC C8 C6 \*C7 H7 1.3969 119.5998 -179.7878 120.1440 1.0872  
 IC C6 C7 C8 C9 1.3962 119.5998 0.1778 120.2030 1.3953  
 IC C6 C7 C8 H8 1.3962 119.5998 -179.8605 120.0247 1.0877  
 IC C9 C7 \*C8 H8 1.3953 120.2030 179.9617 120.0247 1.0877  
 IC C4 C9 C8 C7 1.4037 120.6934 -0.2588 120.2030 1.3969  
 IC N10 C12 C13 C14 1.4644 111.9207 126.8237 121.2254 1.3994  
 IC N10 C12 C13 C18 1.4644 111.9207 -53.4315 119.7779 1.4022  
 IC C14 C18 \*C13 C12 1.3994 118.9963 -179.7504 119.7779 1.5066  
 IC C12 C13 C14 C15 1.5066 121.2254 179.5693 120.6655 1.3976  
 IC C12 C13 C14 H14 1.5066 121.2254 -0.0140 119.5147 1.0897  
 IC C15 C13 \*C14 H14 1.3976 120.6655 -179.5833 119.5147 1.0897  
 IC C12 C13 C18 C17 1.5066 119.7779 -179.7848 120.4528 1.3940  
 IC C12 C13 C18 H18 1.5066 119.7779 1.3930 118.7870 1.0877  
 IC C17 C13 \*C18 H18 1.3940 120.4528 -178.8222 118.7870 1.0877  
 IC C13 C14 C15 C16 1.3994 120.6655 0.2852 119.9409 1.3963  
 IC C13 C14 C15 H15 1.3994 120.6655 -179.8763 119.9840 1.0876  
 IC C16 C14 \*C15 H15 1.3963 119.9409 179.8385 119.9840 1.0876  
 IC C14 C15 C16 C17 1.3976 119.9409 -0.1791 119.7274 1.3982  
 IC C14 C15 C16 H16 1.3976 119.9409 179.8021 120.1125 1.0877  
 IC C17 C15 \*C16 H16 1.3982 119.7274 179.9812 120.1125 1.0877  
 IC C15 C16 C17 C18 1.3963 119.7274 -0.0311 120.2166 1.3940  
 IC C15 C16 C17 H17 1.3963 119.7274 179.9840 119.9361 1.0881  
 IC C18 C16 \*C17 H17 1.3940 120.2166 -179.9849 119.9361 1.0881  
 IC C13 C18 C17 C16 1.4022 120.4528 0.1384 120.2166 1.3982

PATCHING FIRS NONE LAST NONE

!BONDS

CT1 NC2 235.000 1.4540 ! trimethylamine,

!ANGLES

CT1 NC2 CT3 53.000 110.90 ! trimethylamine, admjr.

CT1 NC2 CT2 53.000 110.90 ! trimethylamine, admjr.

CT3 NC2 CT2 53.000 110.90 ! trimethylamine, admjr.

```

NC2 CT1 HA 51.50 107.50 ! ALLOW ALI POL !arg, (DS)
NC2 CT1 CT3 67.70 107.50 ! ALLOW ALI POL !arg, (DS)
NC2 CT1 CT2 67.70 107.50 ! ALLOW ALI POL !arg, (DS)
NC2 CT2 CA 67.70 107.50 ! ALLOW ALI POL !arg, (DS)
!DIHEDRALS
HA CT1 NC2 CT3 2.2500 2 180.00 ! ALLOW PEP POL ARO
! 9.0->2.25 GUANIDINIUM (KK)
HA CT1 NC2 CT2 2.2500 2 180.00 ! ALLOW PEP POL ARO
! 9.0->2.25 GUANIDINIUM (KK)
CT3 CT1 NC2 CT3 0.0000 6 180.00 ! ALLOW ALI POL
! methylguanidinium, admjr., 3/26/92
CT3 CT1 NC2 CT2 0.0000 6 180.00 ! ALLOW ALI POL
! methylguanidinium, admjr., 3/26/92
CT2 CT1 NC2 CT3 0.0000 6 180.00 ! ALLOW ALI POL
! methylguanidinium, admjr., 3/26/92
CT2 CT1 NC2 CT2 0.0000 6 180.00 ! ALLOW ALI POL
! methylguanidinium, admjr., 3/26/92
!IMPROPER
CA CACA CT2 90.0000 0 0.0000 ! ALLOW HEM
! Heme (6-liganded): substituents (KK 05/13/91)
CA CACA HP 20.0000 0 0.0000 ! ALLOW HEM
end

```

**(c) Substrate docking:** We used Autodock 4.02<sup>7a</sup> to dock benzphetamine into (a) the WT enzyme (PDB: 1SUO), and (b) the structures of the WT and F429H mutant snapshots from the long MD. Firstly, the substrate and the protein inputs were prepared using ADT tools.<sup>7b</sup> A grid of 70X70X66Å<sup>3</sup> was then defined with the proximal oxygen of Cpd 0 as the grid centre, and 50 docked substrate conformations were searched based on Lamarckian genetic algorithm<sup>8</sup> for all the snapshots. All other docking and grid parameters were maintained at their default settings. The substrate conformation with the lowest docked energy in the cluster was chosen for further QM/MM study. In the case of the long MD run-snapshots of LW2 and LM4, the benzphetamine could not be fitted into pocket because of the hindrance of the Arg98/Phe206 residues.

**(d) Snapshots details:** From the short MD run, we selected three snapshots labeled as S that signifies short MD: (a) Conf S (without the substrate at 46ps), (b) Conf S1 at 93ps, and (c) Conf S2 at 251ps with the substrate in different orientations. These snapshots were used then for the QM/MM study of the WT enzyme. Subsequently, we replaced the Phe429 residue in these snapshots with His and generated the F429H mutated (MT) snapshots.

In the long MD run (60 ns), we used an essential dynamics analysis, taking into account the Cpd0 complex and its protein host environment (Ala298, Gly299, Thr300, Glu301, Thr302; Pro428, Phe429/His in the F429H mutant, Ser430; Cys436, Leu437, Gly438, Glu439). [It is](#)

worth to note that such a technique is largely applied in literature for addressing the mechanical behavior of large and flexible molecular systems in different contexts (see Ref. 6b of the manuscript and the references cited therein). The essential dynamics consists of building the covariance matrix of the atomic positional fluctuations obtained from MD simulations; after its diagonalization, an orthonormal set of eigenvectors then defines a new set of internal (generalized) coordinates along which the fluctuations occur. In particular, the eigenvectors with the largest eigenvalues allow us to define the essential subspace where to search for the relevant conformational transitions. After carrying out essential dynamics analysis, the classical MD trajectories were then projected onto the respective planes defined by the first two essential eigenvectors. In so doing, we find that in the simulated conditions the reactive pocket, modeled in terms of Cpd 0 and its surrounding environment, mainly exhibits either for WT or MT four different conformational basins (see Figure S1). These are labeled as L to signify long MD, W for the WT enzyme and M for the MT,  $i$  for the number of the conformational basin.

Looking at the occurrence frequency within the first essential plane we find that the WT enzyme prefers LW3 (most sampled) and LW1 conformations, with the latter resembling the crystallographic structure. Similarly, in the F429H mutant LM3 represents the most recurring conformational rearrangement under physiological condition, and secondly LM1. Interestingly, we have also observed that the less sampled basin, labeled as LM2, spontaneously decays to LM3 and, to a lesser extent, to LM1. This analysis also reveals that LM4 and LW4 conformations always switch to their most sampled (i.e., LM3 and LW3) local counterparts, respectively. We explored without substrate Conf LW1-LW3 for WT, and LM1-LM4 for the MT enzymes and with substrate LW1 and LW3 and LM1-LM3.

**(e) The QM region:** All the above snapshots were minimized using CHARMM force field in CHARMM before being subjected to subsequent QM/MM study. For the protein delivery pathways Conf S included Cpd 0, the crucial Thr302, Glu301, and three water molecules that may be involved in the proton shuttle. In all other snapshots, we included also the Phe/His429 residues and additional water molecules. For the investigation of electronic structural features of Cpd 0 we considered only the Cpd 0 complex.

**(f) The optimized QM/MM region:** The MM region that is relaxed during QM/MM geometry optimization comprises of all the residues within 6 Å around Cpd 0 (Arg98, Ile114, Phe115, Trp121, Arg125, Ile179, Leu295, Phe297, Glu301, Thr302, Gln357, Ile363, Val367, Phe429,

Ser430, Arg434, Cys436 (including Cpd 0), Leu437, Glu438, Glu439, Ile441, Ala442, Glu445, and 30 surrounding water molecules). In the substrate containing snapshots, the benzphetamine is also relaxed during optimization.

**(g) QM/MM Methodology and software:** All QM/MM calculations were performed using ChemShell<sup>9</sup> interfaced QM part: Turbomole and MM part: DL\_POLY(MM part).<sup>10</sup> The electronic embedding scheme<sup>11</sup> was used to account for the polarization effect of the QM part induced by the protein environment and to treat QM/MM boundary, we used hydrogen link atoms and the charge shift model.<sup>12</sup> QM subsystem was computed with the unrestricted B3LYP functional with two basis sets; a split valence LACVP basis set (B1) was used for geometry optimization, while the energy was corrected by use of a larger, triple-zeta valence polarized (TZVP) basis set (B2).

**(h) Intrinsic Protein Electric Field Calculation:** The intrinsic electric field generated by the MM charges of the protein<sup>13</sup> at any position was computed using the built in feature of ChemShell 3.1. We evaluated the electric field at the location of iron and its surrounding ligand atoms and computed their average in magnitude and direction. The vector is projected on the iron atom. The direction of the electric field defined in the Chemshell is from + to -. This procedure is similar to our earlier published report.<sup>13</sup>

**(i) References:**

1. Schöneboom, J. C.; Lin, H.; Reuter, N.; Thiel, W.; Cohen, S.; Ogliaro, F.; Shaik, S. *J. Am. Chem. Soc.* **2002**, *124*, 8142. (b) Zheng, J.; Altun, A.; Theil, W.; *J. Comput. Chem.* **2007**, *28*, 2147-2158.
2. Bas D. C.; Rogers D. M.; Jensen J. H. *Proteins* **2008**, *73*, 765-83.
3. Brooks, B. R.; Burccoleri, R. E.; Olafson, B. D.; States D. J.; Karplus, M. *J. Comput. Chem.* **1983**, *4*, 187-217.
4. CHARMM force field: MacKerell, A. D., Jr.; Bashford, D.; Bellott, M.; Dunbrack, R. L., Jr.; Evanseck, J. D.; Field, M. J.; Fischer, S.; Gao, J.; Guo, H.; Ha, S.; Joseph-McCarthy, D.; Kuchnir, L.; Kuczera, K.; Lau, F.T. K.; Mattos, C.; Michnick, S.; Ngo, T.; Nguyen, D. T.; Prodhom, B.; Reiher, W. E., III; Roux, B.; Schlenkrich, M.; Smith, J. C.; Stote, R.; Straub, J.; Watanabe, M.; Wiorkiewicz-Kuczera, J.; Yin, D.; Karplus, M. *J. Phys. Chem. B* **1998**, *102*, 3586.
5. (a) Berendsen, et al. *Comp. Phys. Comm.* **1995**, *91*, 43-56. (b) van der Spoel, et al. *J. Comput. Chem.* **2005**, *26*, 1701-1718. (c) Hess, et al. *J. Chem. Theory. Comput.* **2008**, *4*, 435-447.

6. van Gunsteren, W. F.; Billeter, S. R.; Eising, A. A.; Hunenberger, P. H.; Kruger, P.; Mark, A. E.; Scott, V. R. P.; Tironi, I. G. Biomolecular Simulation: The GROMOS96 Manual and User Guide; vdfHochschverlag AG an der ETH Zurich: Zurich, 1996.
7. (a) AUTODOCK, 10550, North Torrey Pines Road, La Jolla, CA 92037-1000, USA. (b) Michel F.; Sanner. *J. Mol. Graphics Mod.* **1999**, *17*, 57-61.
8. (a) Morris, G. H.; Goodshell, D. S.; Halliday, R. S.; Huey, R.; Hart, W. E.; Belew, R. K.; Olson, A. J. *J. Comput. Chem.* **1998**, *19*, 1639-1662. (b) Hu, X.; Balaz, S.; Shelver, W. H. *J. Mol. Graph. Model.* **2004**, *22*, 293-307.
9. Full reference of Chemshell :Sherwood, P.; De Vries, A. H.; Guest, M. F.; Schreckenbach, G.; Catlow, C. R. A.; French, S. A.; Sokol, A. A.; Bromley, S. T.; Thiel, W.; Turner, A. J.; Billeter, S.; Terstegen, F.; Thiel, S.; Kendrick, J.; Rogers, S. C.; Casci, J.; Watson, M.; King, F.; Karlsen, E.; Sjøvoll, M.; Fahmi, A.; Schäfer, A.; Lennartz, C. *J. Mol. Struct. (THEOCHEM)* **2003**, *632*, 1-28.
10. Smith, W.; Forester, T. *J. Mol. Graph.* **1996**, *14*, 136-141.
11. Bakowies, D.; Thiel, W. *J. Phys. Chem.* **1996**, *100*, 10580-10594.
12. (a) Sherwood, P.; De Vries, A. H.; Collins, S. J.; Greatbanks, S. P.; Burton, N. A.; Vincent, M. A.; Hillier, I. H. *Faraday Discuss.* **1997**, *106*, 79-92. (b) de Vries, A. H.; Sherwood, P.; Collins, S. J.; Rigby, A. M.; Rigutto, M.; Kramer, G. J. *J. Phys. Chem. B* **1999**, *103*, 6133.
13. Cho, K.-B.; Hirao, H.; Chen, H.; Carvajal, M. A.; Cohen, S.; Derat, E.; Thiel, W.; Shaik, S. *J. Phys. Chem. A* **2008**, *112*, 13128-13138.



### 3. Proton delivery mechanism of 2B4 wild (WT) and F429H mutant (MT) types in various snapshots of the short and long MD runs

Note the small differences in the  $TS_{OO}$  barriers for heterolytic cleavage between the **WT** and **MT** enzymes in the snapshots of the short MD.

**Table S1.** Relative energies (kcal/mol) of 2B4 **WT** and **MT** short MD snapshots at UB3LYP/CHARMM level (B1- LACVP, B2-def-TZVP basis set).<sup>a</sup>

| Without substrate |        |           |        |           |
|-------------------|--------|-----------|--------|-----------|
| Conf S-WT         | QM(B1) | QM/MM(B1) | QM(B2) | QM/MM(B2) |
| RC                | 0.0    | 0.0       | 0.0    | 0.0       |
| $TS_{OO}$         | 8.7    | 11.0      | 11.4   | 13.8      |
| TShooh            | 4.3    | 4.4       | 6.2    | 6.3       |
| Cpd I             | -15.2  | -12.7     | -27.5  | -25.0     |
| Fe RS             | -0.8   | 1.2       | -5.1   | -3.1      |
| Conf S-MT         | QM(B1) | QM/MM(B1) | QM(B2) | QM/MM(B2) |
| RC                | 0.0    | 0.0       | 0.0    | 0.0       |
| $TS_{OO}$         | 11.7   | 11.7      | 10.7   | 10.6      |
| Cpd I             | -11.2  | -9.7      | -28.1  | -26.6     |
| With substrate    |        |           |        |           |
| Conf S1-WT        | QM(B1) | QM/MM(B1) | QM(B2) | QM/MM(B2) |
| RC                | 0.0    | 0.0       | 0.0    | 0.0       |
| $TS_{OO}$         | 13.7   | 12.2      | 13.0   | 11.6      |
| IC1               | 8.2    | 5.1       | 8.4    | 5.2       |
| Cpd I             | -24.2  | -19.7     | -36.6  | -32.0     |
| Conf S1-MT        | QM(B1) | QM/MM(B1) | QM(B2) | QM/MM(B2) |
| RC                | 0.0    | 0.0       | 0.0    | 0.0       |
| $TS_{OO}$         | 13.9   | 13.4      | 13.5   | 12.9      |
| IC1               | 8.5    | 6.4       | 9.2    | 7.1       |
| Cpd I             | -17.7  | -14.4     | -30.6  | -27.3     |
| Conf S2-WT        | QM(B1) | QM/MM(B1) | QM(B2) | QM/MM(B2) |
| RC                | 0.0    | 0.0       | 0.0    | 0.0       |
| $TS_{OO}$         | 12.6   | 12.6      | 12.6   | 12.7      |
| Cpd I             | -26.0  | -24.5     | -39.3  | -37.9     |
| Conf S2-MT        | QM(B1) | QM/MM(B1) | QM(B2) | QM/MM(B2) |
| RC                | 0.0    | 0.0       | 0.0    | 0.0       |
| $TS_{OO}$         | 12.1   | 11.4      | 13.2   | 12.5      |
| IC1               | 2.3    | 0.9       | 4.8    | 3.4       |
| Cpd I             | -30.2  | -23.3     | -40.8  | -33.9     |

<sup>a</sup>RC is Cpd 0.  $TS_{OO}$  is the O-OH cleavage TS. TShooh is the TS for uncoupling, Fe RS is the resting state. IC1 is an intermediate along the O-OH cleavage coordinate that is observed in some snapshots and has a tiny barrier to collapse to Cpd I. The same terminology is used in other tables.

Note from **Table S2** that the differences in the  $TS_{OO}$  barriers for heterolytic cleavage of the WT enzyme are somewhat lower than those in the MT enzyme, during the snapshots of the long MD in the absence of the substrate. But the differences are not sufficiently consistent to suggest a longer living Cpd 0 in the MT.

**Table S2.** Relative energies (kcal/mol) of 2B4 **WT** and **MT** long MD snapshots in the absence of substrate at UB3LYP /CHARMM level (B1- LACVP, B2-def-TZVP basis set)

|           |        |           |        |           |
|-----------|--------|-----------|--------|-----------|
| Conf LW1  | QM(B1) | QM/MM(B1) | QM(B2) | QM/MM(B2) |
| RC        | 0.0    | 0.0       | 0.0    | 0.0       |
| $TS_{OO}$ | 12.3   | 12.2      | 13.1   | 13.0      |
| Cpd I     | -35.7  | -33.4     | -39.3  | -37.0     |
| Conf LW2  | QM(B1) | QM/MM(B1) | QM(B2) | QM/MM(B2) |
| RC        | 0.0    | 0.0       | 0.0    | 0.0       |
| $TS_{OO}$ | 9.7    | 11.1      | 9.3    | 10.7      |
| Cpd I     | -31.2  | -19.4     | -35.5  | -23.7     |
| Conf LW3  | QM(B1) | QM/MM(B1) | QM(B2) | QM/MM(B2) |
| RC        | 0.0    | 0.0       | 0.0    | 0.0       |
| $TS_{OO}$ | 13.4   | 12.1      | 13.6   | 12.3      |
| IC1       | 0.3    | 4.7       | -2.9   | 1.4       |
| Cpd I     | -9.6   | -5.2      | -19.8  | -15.5     |
| RC1       | 0.0    | 0.0       | 0.0    | 0.0       |
| TShooh    | 10.5   | 12.1      | 13.4   | 15.1      |
| Fe RS     | 7.2    | 9.6       | 5.5    | 8.0       |
| Conf LM1  | QM(B1) | QM/MM(B1) | QM(B2) | QM/MM(B2) |
| RC        | 0.0    | 0.0       | 0.0    | 0.0       |
| $TS_{OO}$ | 12.6   | 15.9      | 11.8   | 15.1      |
| Cpd I     | -26.6  | -9.3      | -33.4  | -16.0     |
| Conf LM2  | QM(B1) | QM/MM(B1) | QM(B2) | QM/MM(B2) |
| RC        | 0.0    | 0.0       | 0.0    | 0.0       |
| $TS_{OO}$ | 14.5   | 14.4      | 16.3   | 16.3      |
| IC1       | 12.2   | 12.4      | 14.2   | 14.4      |
| Cpd I     | -16.0  | -7.1      | -27.4  | -18.6     |
| Conf LM3  | QM(B1) | QM/MM(B1) | QM(B2) | QM/MM(B2) |
| RC        | 0.0    | 0.0       | 0.0    | 0.0       |
| TShooh    | 9.1    | 9.1       | 12.4   | 12.3      |
| Fe RS     | 8.5    | 9.0       | 9.6    | 10.0      |
| Conf LM4  | QM(B1) | QM/MM(B1) | QM(B2) | QM/MM(B2) |
| RC        | 0.0    | 0.0       | 0.0    | 0.0       |
| $TS_{OO}$ | 17.3   | 17.3      | 18.0   | 18.1      |
| Cpd I     | -20.4  | -9.2      | -24.2  | -12.9     |

**Table S3.** Mulliken spin density distribution for 2B4 **WT** and **MT** short MD snapshots in the presence and absence of substrate at QM/MM B1 level.

| Without substrate         |       | Conf S-WT        |        |       |            | Conf S-MT        |                  |       |  |
|---------------------------|-------|------------------|--------|-------|------------|------------------|------------------|-------|--|
| Spin                      | RC    | TS <sub>00</sub> | TShooh | Cpd I | Fe RS      | RC               | TS <sub>00</sub> | Cpd I |  |
| Fe                        | 1.07  | 1.54             | 1.10   | 1.42  | 1.20       | 1.08             | 1.48             | 1.41  |  |
| Op                        | 0.05  | 0.10             | 0.03   | 0.73  | 0.01       | 0.05             | 0.15             | 0.74  |  |
| OH                        | 0.00  | -0.42            | 0.00   | 0.01  | 0.00       | 0.00             | -0.42            | 0.01  |  |
| SH                        | -0.04 | -0.10            | -0.05  | -0.25 | -0.11      | -0.04            | -0.09            | -0.23 |  |
| Por                       | -0.08 | -0.12            | -0.08  | -0.91 | -0.10      | -0.08            | -0.11            | -0.93 |  |
| Glu301                    | 0.00  | 0.00             | 0.00   | 0.00  | 0.00       | 0.00             | 0.00             | 0.00  |  |
| Thr302                    | 0.00  | 0.00             | 0.00   | 0.00  | 0.00       | 0.00             | 0.00             | 0.00  |  |
| rest                      | 0.00  | 0.01             | 0.00   | 0.00  | 0.00       | 0.00             | 0.00             | 0.00  |  |
| With substrate Conf S1-WT |       |                  |        |       | Conf S2-WT |                  |                  |       |  |
| Spin                      | RC    | TS <sub>00</sub> | IC1    | Cpd I | RC         | TS <sub>00</sub> | IC1              | Cpd I |  |
| Fe                        | 1.00  | 1.28             | 1.35   | 1.26  | 1.01       | 1.27             | 1.23             |       |  |
| Op                        | 0.09  | 0.39             | 0.77   | 0.86  | 0.08       | 0.40             | 0.89             |       |  |
| OH                        | 0.00  | -0.52            | -0.77  | 0.00  | 0.00       | -0.52            | 0.00             |       |  |
| SH                        | -0.02 | -0.06            | -0.10  | -0.22 | -0.03      | -0.06            | -0.24            |       |  |
| Por                       | -0.07 | -0.09            | -0.26  | -0.90 | -0.07      | -0.08            | -0.88            |       |  |
| Glu301                    | 0.00  | 0.00             | 0.00   | 0.00  | 0.00       | 0.00             | 0.00             |       |  |
| Thr302                    | 0.00  | 0.00             | 0.01   | 0.00  | 0.00       | -0.01            | 0.00             |       |  |
| Phe429                    | 0.00  | 0.00             | 0.00   | 0.00  | 0.00       | 0.00             | 0.00             |       |  |
| rest                      | 0.00  | 0.00             | 0.00   | 0.00  | 0.00       | 0.00             | 0.00             |       |  |
| With substrate Conf S1-MT |       |                  |        |       | Conf S2-MT |                  |                  |       |  |
| Spin                      | RC    | TS <sub>00</sub> | IC1    | Cpd I | RC         | TS <sub>00</sub> | IC1              | Cpd I |  |
| Fe                        | 1.01  | 1.34             | 1.38   | 1.25  | 1.01       | 1.19             | 1.43             | 1.19  |  |
| Op                        | 0.09  | 0.42             | 0.74   | 0.87  | 0.09       | 0.42             | 0.68             | 0.93  |  |
| OH                        | 0.00  | -0.61            | -0.86  | 0.00  | 0.00       | -0.47            | -0.99            | 0.00  |  |
| SH                        | -0.03 | -0.07            | -0.08  | -0.22 | -0.03      | -0.05            | -0.04            | -0.23 |  |
| Por                       | -0.07 | -0.09            | -0.19  | -0.90 | -0.07      | -0.08            | -0.09            | -0.88 |  |
| Glu301                    | 0.00  | 0.00             | 0.00   | 0.00  | 0.00       | 0.00             | 0.00             | 0.00  |  |
| Thr302                    | 0.00  | 0.00             | 0.01   | 0.00  | 0.00       | -0.01            | 0.01             | 0.00  |  |
| His429                    | 0.00  | 0.00             | 0.00   | 0.00  | 0.00       | 0.00             | 0.00             | 0.00  |  |
| rest                      | 0.00  | 0.00             | 0.00   | 0.00  | 0.00       | 0.00             | 0.00             | 0.00  |  |

**Table S4.** Mulliken spin density distribution for 2B4 WT long MD snapshots in the absence of substrate at QM/MM B1 level.

| Without substrate |       | Conf LW1         |       |  | Conf LW2 |                  |       |
|-------------------|-------|------------------|-------|--|----------|------------------|-------|
| Spin              | RC    | TS <sub>OO</sub> | Cpd I |  | RC       | TS <sub>OO</sub> | Cpd I |
| Fe                | 1.19  | 1.63             | 1.54  |  | 1.07     | 1.56             | 1.53  |
| Op                | 0.02  | 0.00             | 0.62  |  | 0.01     | -0.08            | 0.61  |
| OH                | 0.00  | -0.41            | 0.00  |  | 0.00     | -0.36            | 0.00  |
| SH                | -0.13 | -0.11            | -0.26 |  | -0.01    | -0.03            | -0.33 |
| Por               | -0.07 | -0.12            | -0.91 |  | -0.06    | -0.09            | -0.82 |
| Glu301            | 0.00  | 0.00             | 0.00  |  | 0.00     | 0.00             | 0.00  |
| Thr302            | 0.00  | 0.00             | 0.00  |  | 0.00     | 0.00             | 0.00  |
| Phe429            | 0.00  | 0.00             | 0.00  |  | 0.00     | 0.00             | 0.00  |
| rest              | 0.00  | 0.01             | 0.01  |  | 0.00     | 0.00             | 0.01  |

  

| Without substrate |       | Conf LW3         |       |       |       |        |       |
|-------------------|-------|------------------|-------|-------|-------|--------|-------|
| Spin              | RC    | TS <sub>OO</sub> | IC1   | Cpd I | RC1   | TShooh | Fe RS |
| Fe                | 1.03  | 1.35             | 1.21  | 1.37  | 1.05  | 1.11   | 1.14  |
| Op                | 0.01  | 0.13             | 0.85  | 0.73  | 0.01  | -0.01  | -0.01 |
| OH                | 0.00  | -0.39            | 0.03  | 0.01  | 0.00  | 0.00   | 0.00  |
| SH                | 0.02  | -0.01            | -0.18 | -0.18 | 0.01  | -0.03  | -0.05 |
| Por               | -0.06 | -0.09            | -0.90 | -0.92 | -0.07 | -0.08  | -0.09 |
| Glu301            | 0.00  | 0.00             | 0.00  | 0.00  | 0.00  | 0.00   | 0.00  |
| Thr302            | 0.00  | 0.00             | 0.00  | 0.00  | 0.00  | 0.00   | 0.00  |
| Phe429            | 0.00  | 0.00             | 0.00  | 0.00  | 0.00  | 0.00   | 0.00  |
| rest              | 0.00  | 0.01             | 0.00  | 0.00  | 0.00  | 0.00   | 0.00  |

**Table S5.** Mulliken spin density distribution for 2B4 MT long MD snapshots in the absence of substrate at QM/MM B1 level.

| Without substrate |       | Conf LM1         |       | Conf LM2 |                  |       |       |
|-------------------|-------|------------------|-------|----------|------------------|-------|-------|
| Spin              | RC    | TS <sub>OO</sub> | Cpd I | RC       | TS <sub>OO</sub> | IC1   | Cpd I |
| Fe                | 1.12  | 1.67             | 1.45  | 1.12     | 1.81             | 1.79  | 1.54  |
| Op                | 0.03  | 0.27             | 0.69  | 0.03     | 0.26             | 0.35  | 0.60  |
| OH                | 0.00  | -0.61            | 0.00  | 0.00     | -0.83            | -0.98 | 0.01  |
| SH                | -0.08 | -0.15            | -0.18 | -0.08    | -0.11            | -0.04 | -0.21 |
| Por               | -0.07 | -0.19            | -0.96 | -0.07    | -0.15            | -0.13 | -0.93 |
| Glu301            | 0.00  | 0.00             | 0.00  | 0.00     | 0.00             | 0.00  | 0.00  |
| Thr302            | 0.00  | -0.01            | 0.00  | 0.00     | 0.01             | 0.00  | -0.01 |
| His429            | 0.00  | 0.00             | 0.00  | 0.00     | 0.00             | 0.00  | 0.00  |
| rest              | 0.00  | 0.02             | 0.01  | 0.00     | 0.02             | 0.02  | 0.01  |
| Without substrate |       | Conf LM3         |       | Conf LM4 |                  |       |       |
| Spin              | RC    | TShooh           | Fe RS | RC       | TS <sub>OO</sub> | Cpd I |       |
| Fe                | 1.07  | 1.08             | 1.09  | 1.11     | 1.25             | 1.37  |       |
| Op                | -0.02 | -0.01            | -0.01 | 0.02     | 0.28             | 0.75  |       |
| OH                | 0.01  | 0.00             | 0.00  | -0.01    | -0.39            | 0.01  |       |
| SH                | -0.01 | -0.02            | -0.02 | -0.05    | -0.06            | -0.30 |       |
| Por               | -0.06 | -0.06            | -0.06 | -0.07    | -0.08            | -0.82 |       |
| Glu301            | 0.00  | 0.00             | 0.00  | 0.00     | 0.00             | 0.00  |       |
| Thr302            | 0.00  | 0.00             | 0.00  | 0.00     | 0.00             | 0.00  |       |
| His429            | 0.00  | 0.00             | 0.00  | 0.00     | 0.00             | -0.01 |       |
| rest              | 0.00  | 0.00             | 0.00  | 0.00     | 0.00             | 0.00  |       |

**Table S6.** Mulliken spin density distribution for 2B4 **WT** and **MT** long MD snapshots in the presence of substrate at QM/MM B1 level.

| With substrate Conf LW1 |       |                  |                | Conf LW3 |                  |                |         |
|-------------------------|-------|------------------|----------------|----------|------------------|----------------|---------|
| Spin                    | RC    | TS <sub>OO</sub> | Cpd I          | RC       | TS <sub>OO</sub> | IC1            | Cpd I   |
| Fe                      | 1.11  | 1.53             | 1.46           | 1.01     | 1.48             | 1.58           | 1.47    |
| Op                      | 0.04  | 0.04             | 0.69           | 0.04     | 0.25             | 0.46           | 0.65    |
| OH                      | 0.00  | -0.39            | 0.01           | 0.00     | -0.61            | -0.87          | 0.01    |
| SH                      | -0.08 | -0.08            | -0.30          | 0.02     | -0.03            | -0.04          | -0.17   |
| Por                     | -0.06 | -0.11            | -0.84          | 0.07     | -0.10            | -0.15          | -0.95   |
| Glu301                  | 0.00  | 0.00             | 0.00           | 0.00     | 0.00             | 0.00           | 0.00    |
| Thr302                  | 0.00  | 0.00             | -0.01          | 0.00     | 0.00             | 0.00           | 0.00    |
| Phe429                  | 0.00  | 0.00             | 0.00           | 0.00     | 0.00             | 0.00           | 0.00    |
| rest                    | 0.00  | 0.01             | 0.00           | 0.00     | 0.01             | 0.01           | 0.00    |
| With substrate Conf LM2 |       |                  |                | Conf LM1 |                  |                |         |
| Spin                    | RC    | TS <sub>OO</sub> | Cpd I          | RC       | TS <sub>OO</sub> | I <sub>H</sub> | Heme-OH |
| Fe                      | 1.05  | 1.54             | 1.35           | 1.07     | 1.58             | 1.53           | 1.56    |
| Op                      | 0.07  | 0.24             | 0.77           | 0.05     | 0.35             | 0.59           | 0.57    |
| OH                      | -0.01 | -0.51            | 0.01           | -0.01    | -0.61            | -0.52          | -0.02   |
| SH                      | -0.06 | -0.08            | -0.27          | -0.06    | -0.09            | -0.07          | -0.07   |
| Por                     | -0.06 | -0.18            | -0.85          | -0.06    | -0.23            | -0.54          | -1.04   |
| Glu301                  | 0.00  | 0.00             | 0.00           | 0.00     | 0.00             | 0.00           | 0.00    |
| Thr302                  | 0.00  | -0.01            | -0.01          | 0.00     | -0.01            | 0.01           | 0.00    |
| His429                  | 0.00  | 0.00             | 0.00           | 0.00     | 0.00             | 0.00           | 0.00    |
| rest                    | 0.00  | 0.00             | 0.00           | 0.00     | 0.01             | 0.01           | 0.00    |
| With substrate Conf LM3 |       |                  |                |          |                  |                |         |
| Spin                    | RC    | TS <sub>OO</sub> | I <sub>H</sub> | Heme-OH  |                  |                |         |
| Fe                      | 1.10  | 1.50             | 1.58           | 1.51     |                  |                |         |
| Op                      | 0.05  | 0.46             | 0.54           | 0.62     |                  |                |         |
| OH                      | 0.00  | -0.77            | -0.99          | -0.02    |                  |                |         |
| SH                      | -0.08 | -0.07            | -0.05          | -0.09    |                  |                |         |
| Por                     | -0.06 | -0.13            | -0.14          | -1.04    |                  |                |         |
| Glu301                  | 0.00  | 0.00             | 0.00           | 0.00     |                  |                |         |
| Thr302                  | 0.00  | 0.01             | 0.01           | 0.00     |                  |                |         |
| His 429                 | 0.00  | 0.00             | 0.00           | 0.00     |                  |                |         |
| rest                    | 0.00  | 0.01             | 0.01           | 0.01     |                  |                |         |

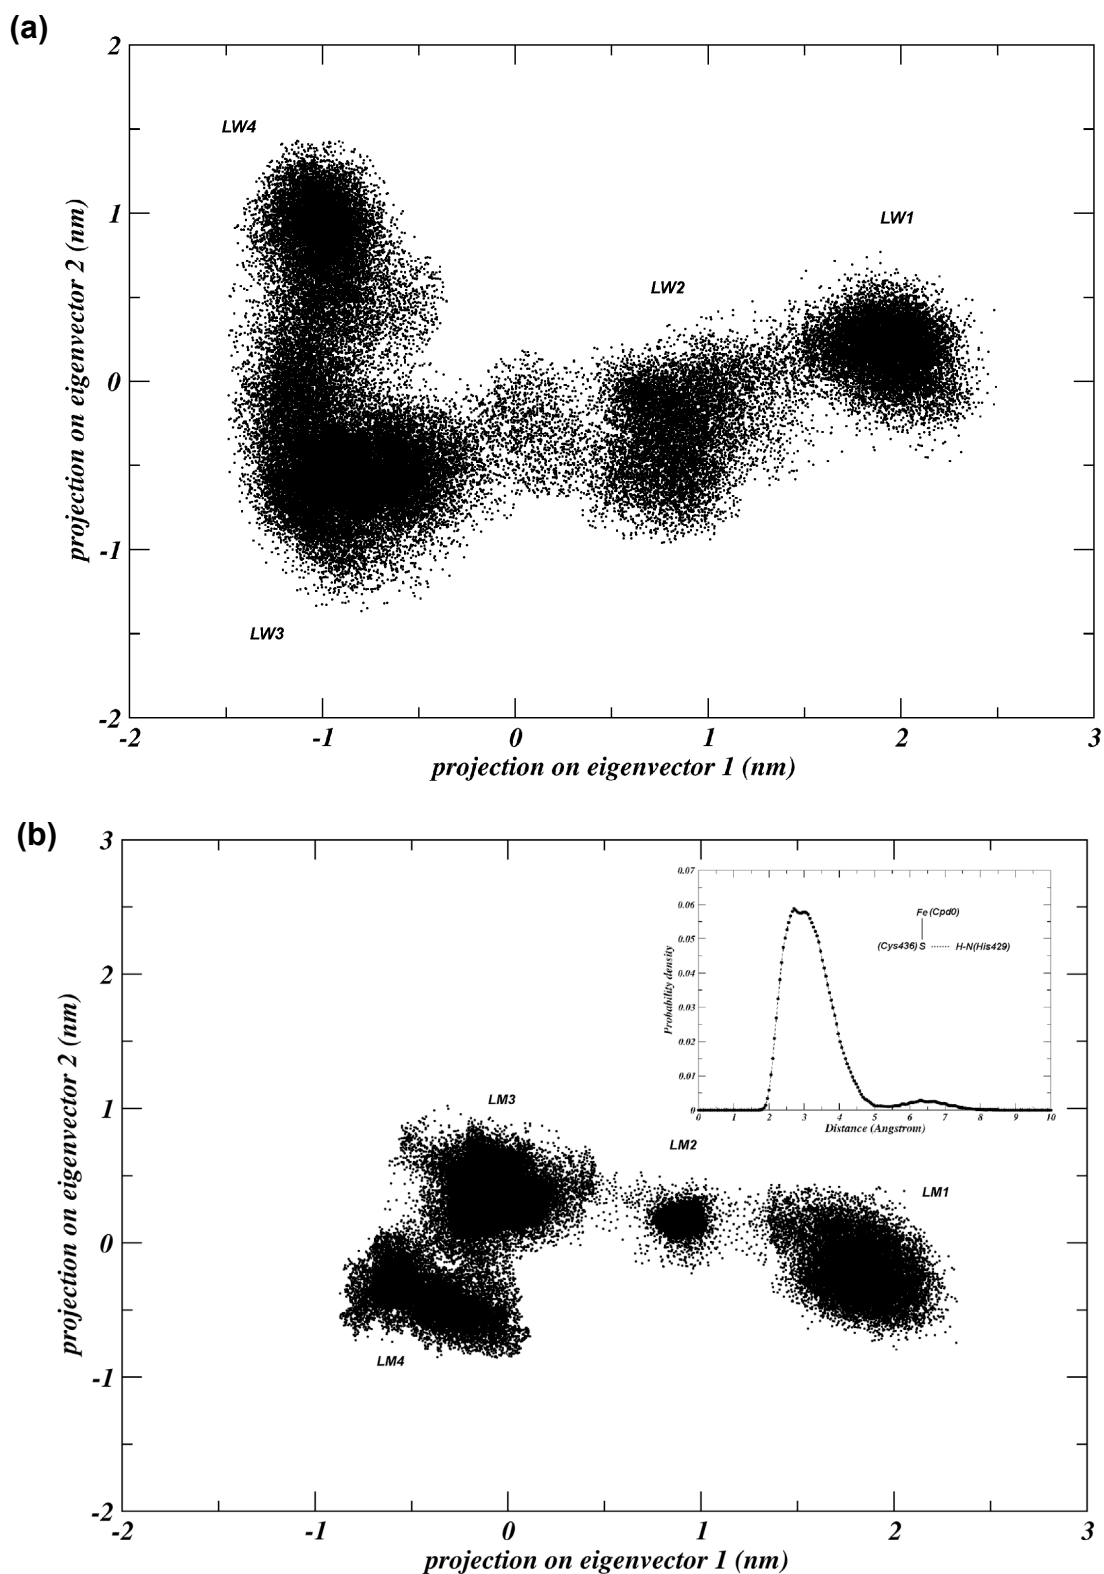

**Figure S1.** Projection of the trajectory of the active site residues and Cpd 0 species onto the essential plane as obtained from the diagonalization of the related covariance matrix extracted from the 60 ns MD sampling of (a) WT and (b) MT enzymes in physiological conditions (i.e. wet CYP 2B4 enzymes at 298 K).

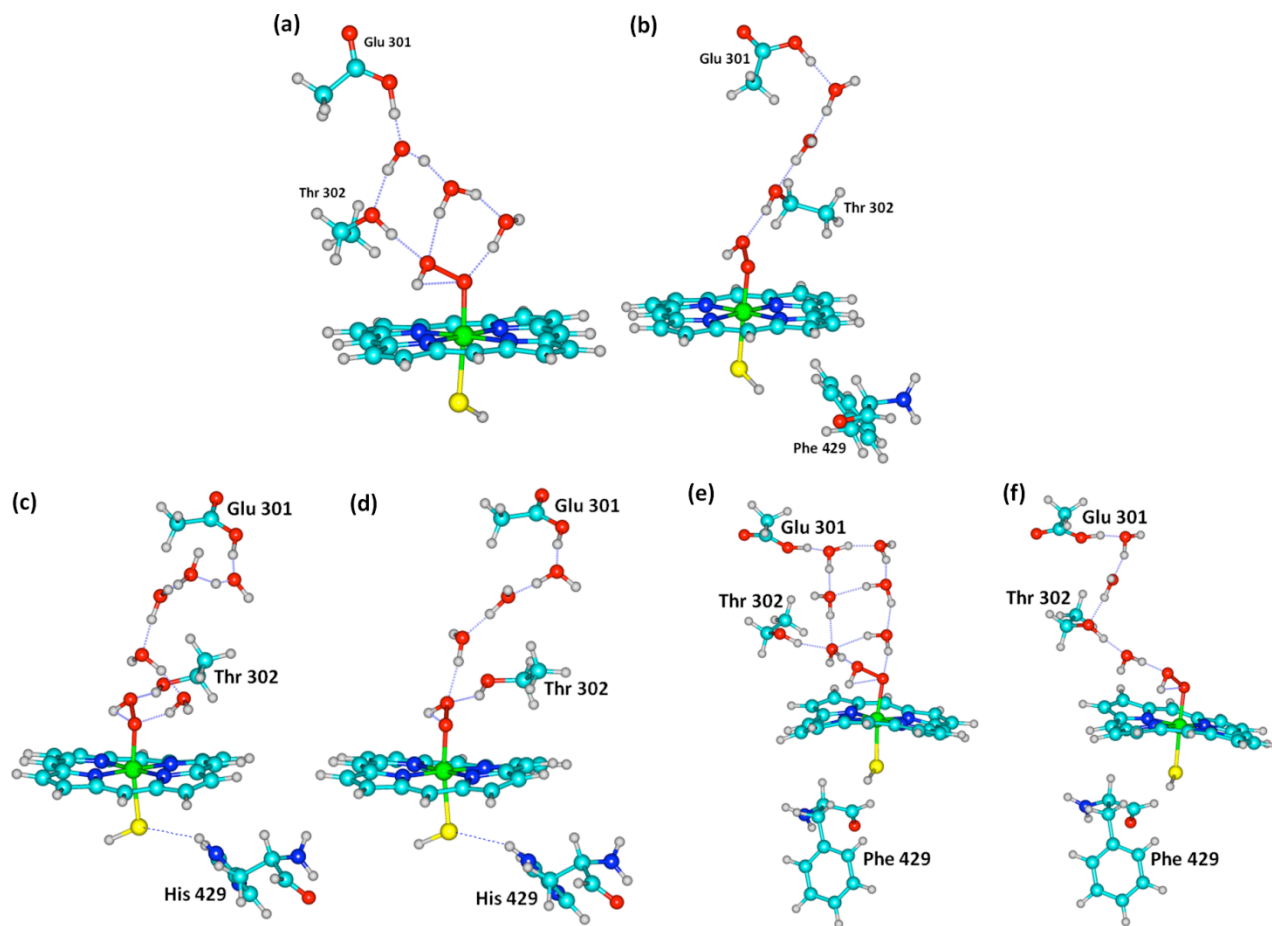

**Figure S2.** Water cluster arrangement of 2B4 **WT** and **MT** snapshots in Conf S (a), Conf S1 (b), Conf LM2 (c), Conf LM2 with substrate (d), Conf LW3 (e) and Conf LW3 with substrate (f). Only the QM region is shown. Note that water structure of the active site in the presence of substrate prefers the protonation of the distal OH group. On the other hand in the absence of the substrate, waters are close also to the proximal oxygen, thus prepared for uncoupling and H<sub>2</sub>O<sub>2</sub> production.



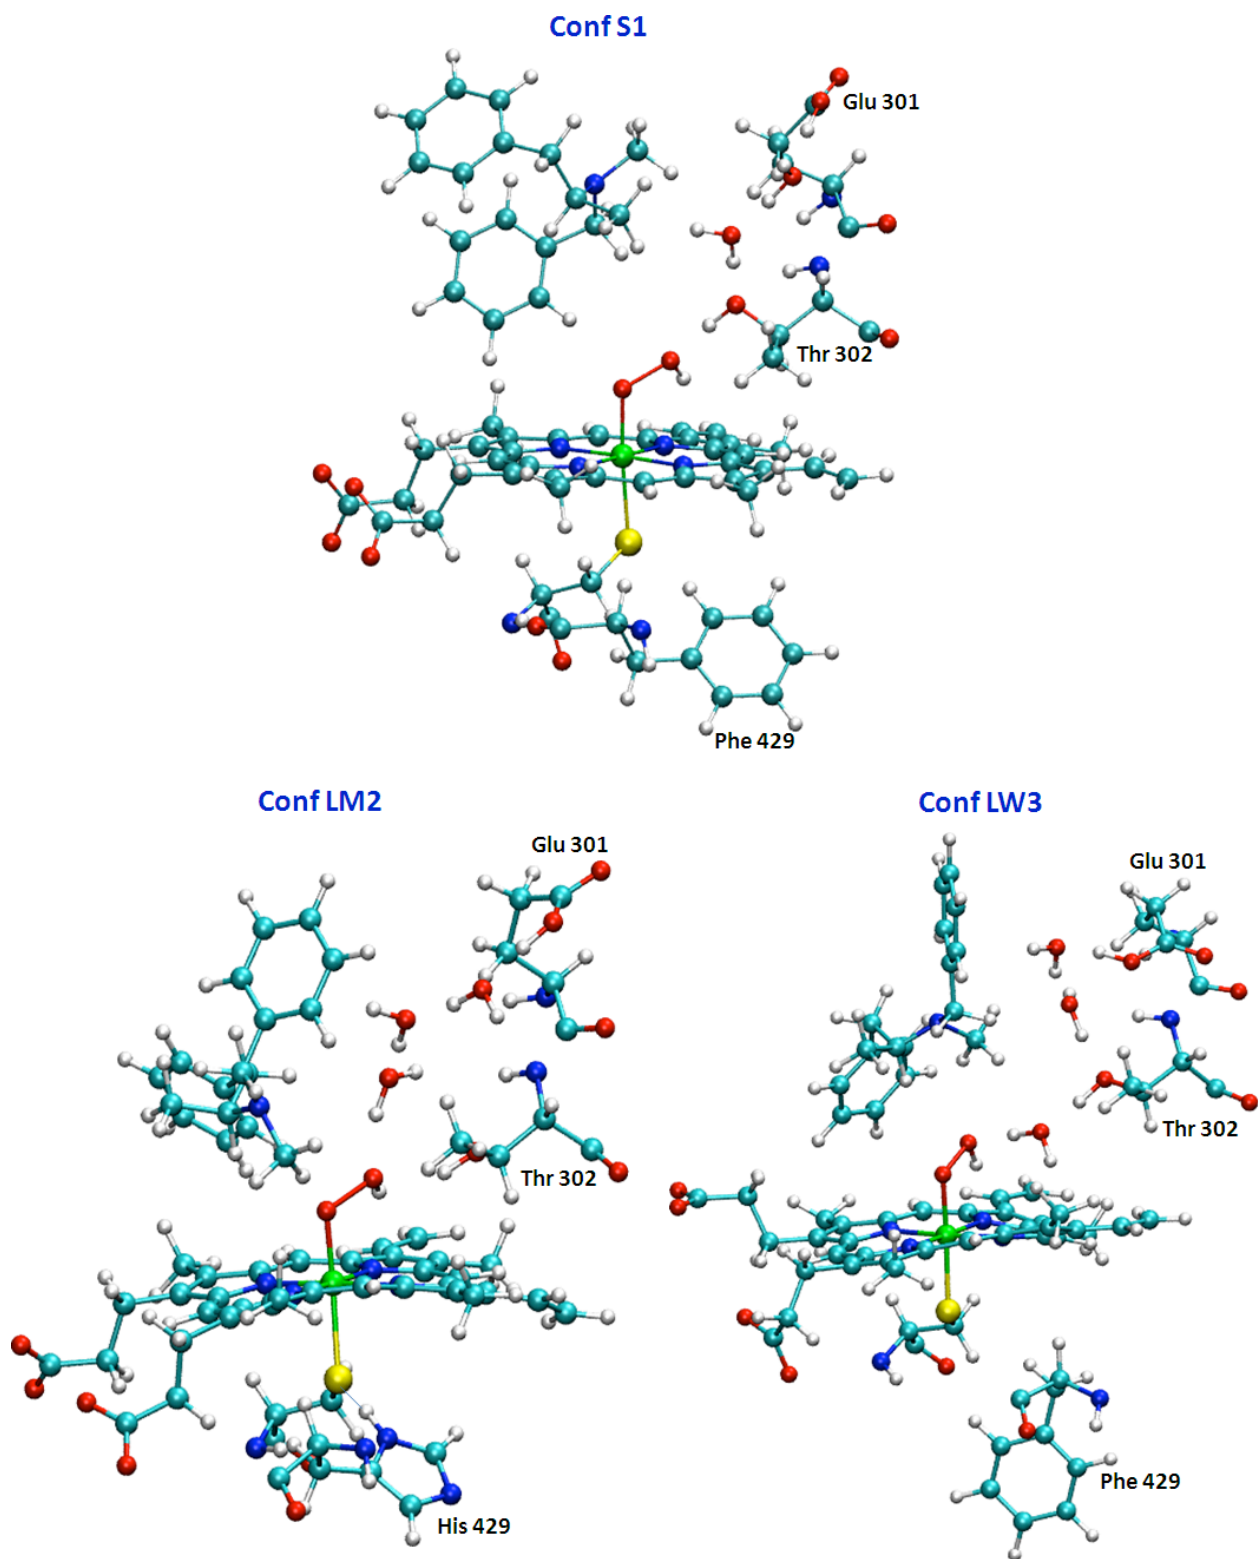

**Figure S3.** Benzphetamine in the active site region of WT and MT 2B4 enzymes

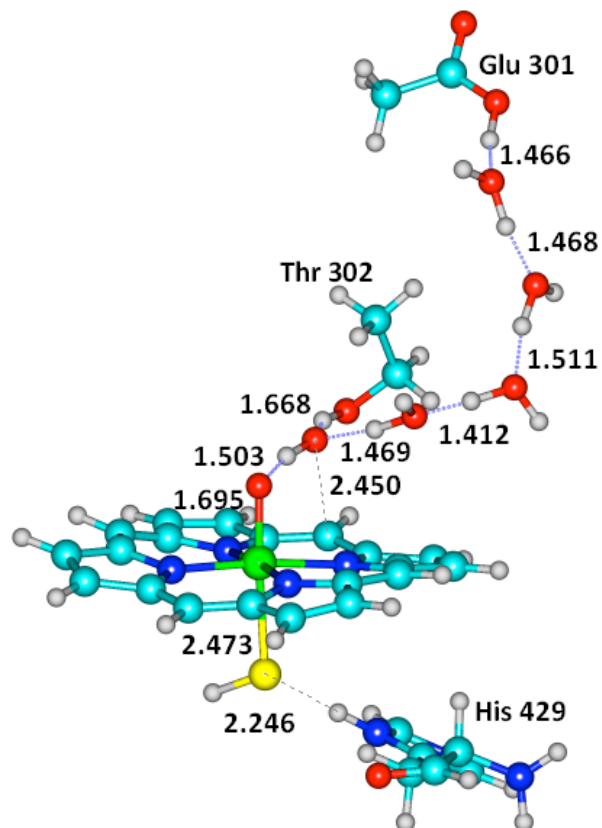

**Figure S4.** Key bond distances (in Å) in the I<sub>H</sub> LM1 of 2B4 enzyme at (UB3LYP/B1/CHARMM) level. Only the QM region is shown. The spin density of the nascent OH is -0.52 (See Table S6).

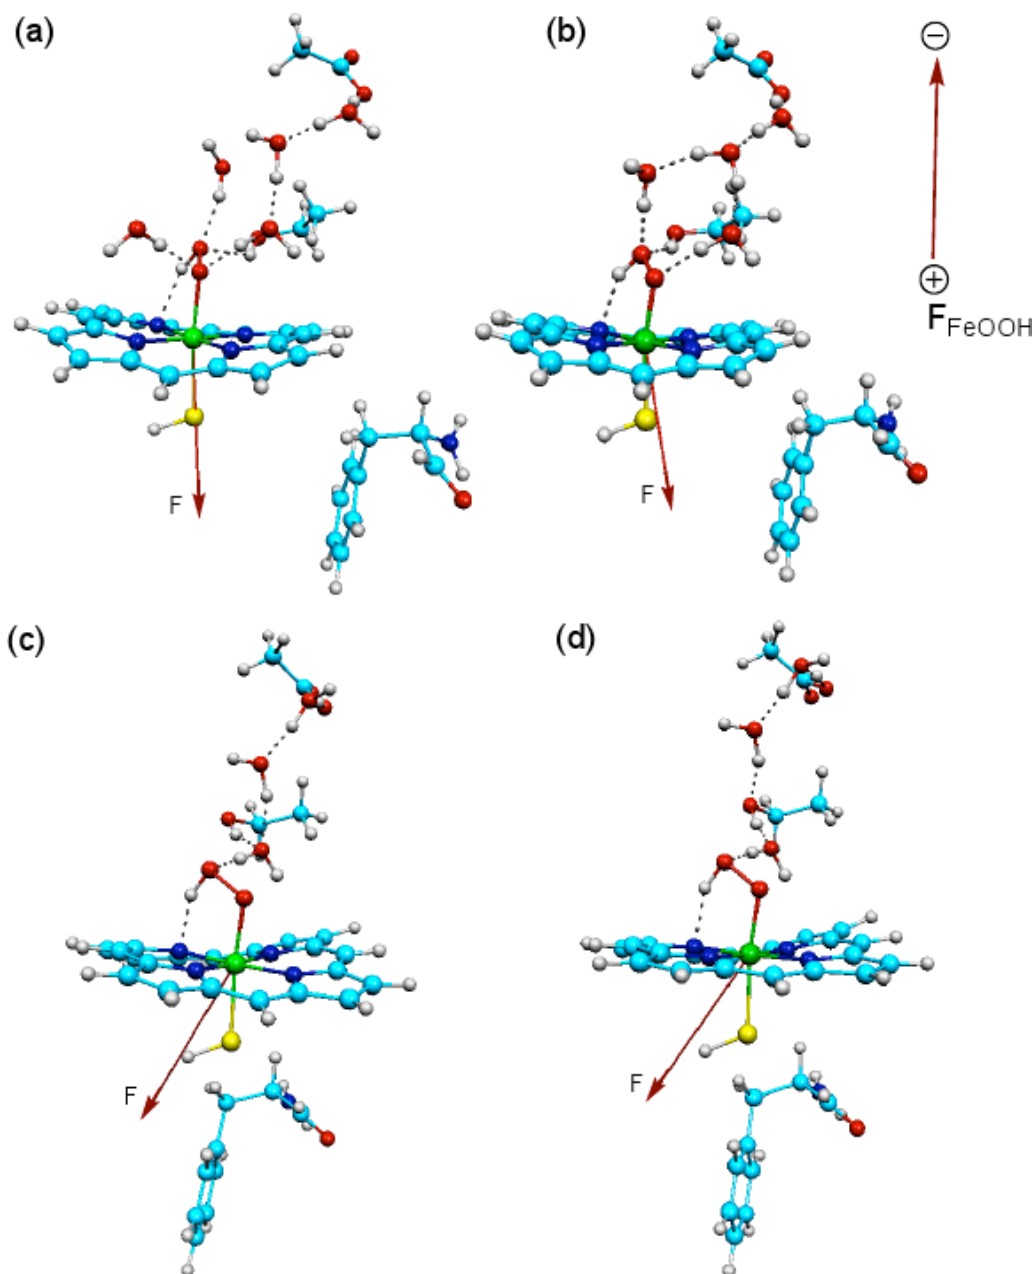

**Figure S5:** The protein electrical field closest to S-Fe-OOH axis, in various CYP 2B4 WT snapshots Conf LW1 (a), Conf LW1 with substrate (b) Conf LW3 (c), Conf LW3 with substrate (d). The conventional direction of electric field is also represented. In all WT cases the negative pole is away from the FeOOH moiety.

Figure S6 shows the intrinsic electric field vector for the mutant conformations LM1-LM3. It is apparent that in LM1 and LM3, in the presence of substrate the intrinsic field switches direction: Now, the negative pole is pointing towards OOH group. This will retard the electron flow from the heme to the nascent OH radical and will retard the PCET step thus preferring meso hydroxylation by the  $\text{OH}\cdot$ . Note also, that in the unimportant LM2 conformation this change does not occur.

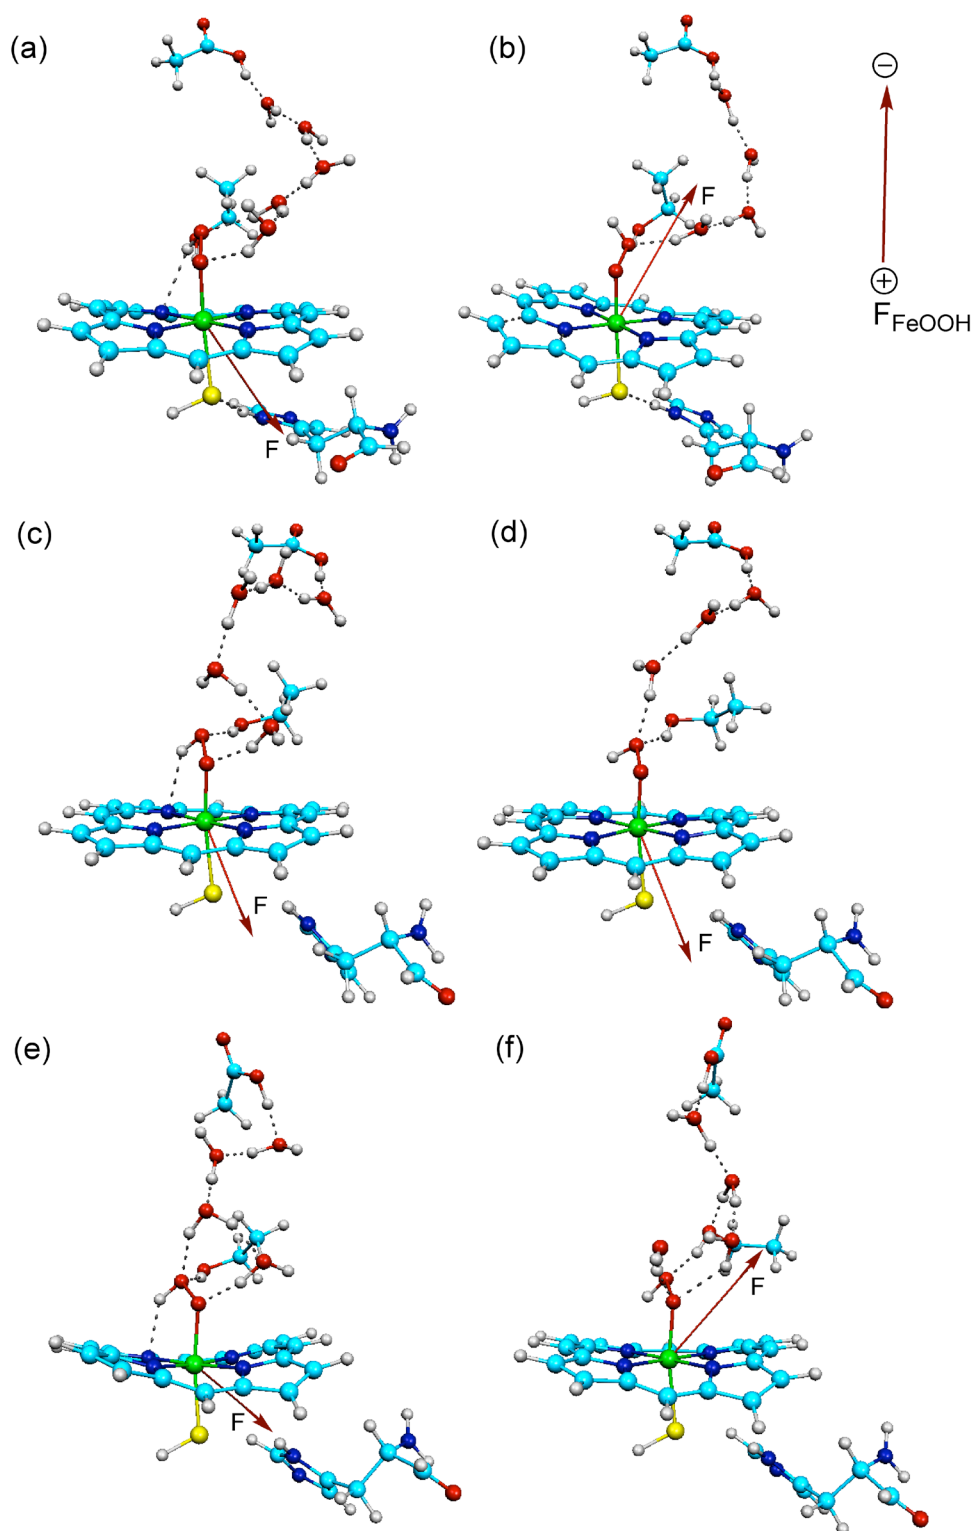

**Figure S6:** The protein electrical field or its component closest to S-Fe-OOH axis, various CYP 2B4 MT snapshots Conf LM1 (a), Conf LM1 with substrate (b) Conf LM2 (c), Conf LM2 with substrate (d) Conf LM3 (e), Conf LM3 with substrate (f) are shown. The conventional direction of electric field is also represented.

### 3. Cartesian coordinates of the QM region

#### Conf LW1-<sup>2</sup>Cpd 0

N -2.444071 -8.312338 -0.168943  
H -3.121662 -8.975618 0.163945  
C -1.238758 -8.090481 0.605464  
H -0.521548 -7.504482 0.005819  
C -1.480462 -7.224346 1.914967  
H -0.659771 -7.404929 2.623602  
H -1.405090 -6.171583 1.628351  
C -2.814726 -7.448584 2.581778  
C -3.022739 -8.485235 3.506489  
H -2.203992 -9.156853 3.749876  
C -4.264134 -8.639510 4.134325  
H -4.412883 -9.427158 4.865232  
C -5.318223 -7.772339 3.828753  
H -6.281687 -7.891958 4.310734  
C -3.882637 -6.587131 2.279792  
H -3.736242 -5.776979 1.572572  
C -5.127081 -6.753946 2.890468  
H -5.941401 -6.090057 2.628187  
C -0.516815 -9.423802 0.895946  
O -1.091453 -10.520290 0.742846  
S -0.525713 -3.521057 5.371785  
H 0.710267 0.540111 3.012833  
O 1.900858 -0.978020 2.787590  
O 1.184481 0.230626 2.204047  
FE 0.814790 -1.972236 4.018546  
N 1.697958 -3.655402 3.371063  
N -0.642160 -2.118653 2.654233  
N -0.037362 -0.256954 4.707838  
N 2.259818 -1.832288 5.401821  
C 2.639945 -4.436083 4.018741  
C 2.975266 -5.604638 3.197365  
C 2.254867 -5.472316 2.029243  
C 1.408849 -4.286189 2.180585  
C -0.652656 -2.999008 1.595355  
C -1.888631 -2.845348 0.822192  
C -2.625031 -1.839642 1.423876  
C -1.818792 -1.395617 2.580302  
C -1.318709 0.206212 4.428983  
C -1.595748 1.414254 5.198796  
C -0.451781 1.709933 5.925739  
C 0.509232 0.637286 5.621462  
C 2.553819 -0.700530 6.143820  
C 3.687015 -0.961639 7.028296  
C 3.999115 -2.298658 6.883334  
C 3.136708 -2.823369 5.826782  
C 3.251404 -4.071048 5.215910  
H 3.935603 -4.787465 5.654796  
C 0.355373 -3.931832 1.333892  
H 0.256251 -4.518532 0.425612  
C -2.133864 -0.349515 3.448067  
H -3.083976 0.141473 3.283278

C 1.766707 0.449403 6.198477  
H 2.139866 1.233747 6.849956  
h -0.776239 -2.941534 6.598870  
h 3.690351 -6.381588 3.467677  
h 2.273034 -6.068681 1.117056  
h -2.123636 -3.489959 -0.024753  
h -3.561130 -1.352539 1.150898  
h -2.531822 1.968760 5.132811  
h -0.205400 2.523180 6.608375  
h 4.167769 -0.192298 7.632495  
h 4.705659 -2.874248 7.481296  
h -2.609597 -7.898878 -1.064278  
h 0.530028 -9.355143 1.191703

#### Conf LW1-<sup>4</sup>Cpd 0

N -2.447651 -8.310790 -0.167305  
H -3.126748 -8.973462 0.163892  
C -1.244379 -8.091925 0.610768  
H -0.526984 -7.501710 0.015628  
C -1.490758 -7.231485 1.922356  
H -0.663498 -7.401937 2.625791  
H -1.430363 -6.177924 1.635065  
C -2.817287 -7.469188 2.600109  
C -3.001265 -8.488433 3.548903  
H -2.170199 -9.141875 3.799875  
C -4.232231 -8.643475 4.196731  
H -4.359244 -9.413224 4.950545  
C -5.301627 -7.797576 3.885038  
H -6.256418 -7.918142 4.384028  
C -3.900627 -6.629467 2.292418  
H -3.773369 -5.832409 1.566952  
C -5.135386 -6.798622 2.921388  
H -5.959582 -6.148935 2.654357  
C -0.520729 -9.425325 0.896860  
O -1.093531 -10.521802 0.738037  
S -0.656760 -3.602097 5.422810  
H 0.815671 0.594816 2.924464  
O 2.019534 -0.890658 2.559509  
O 1.247967 0.330406 2.081087  
FE 0.860315 -1.991161 3.993917  
N 1.728568 -3.677663 3.332650  
N -0.595127 -2.137120 2.617298  
N 0.045174 -0.244037 4.658306  
N 2.307147 -1.842932 5.365951  
C 2.665721 -4.459024 3.987597  
C 2.992326 -5.630929 3.172953  
C 2.272459 -5.501798 2.002216  
C 1.433972 -4.313303 2.143677  
C -0.623901 -3.024821 1.565870  
C -1.868728 -2.870279 0.810067  
C -2.590015 -1.853328 1.412165  
C -1.763965 -1.400260 2.550354

C -1.229187 0.229943 4.367491  
C -1.490622 1.451281 5.118672  
C -0.341599 1.743815 5.842385  
C 0.602445 0.655072 5.559522  
C 2.620032 -0.708602 6.100601  
C 3.745183 -0.984590 6.985258  
C 4.030155 -2.330020 6.854761  
C 3.167091 -2.847332 5.797643  
C 3.273040 -4.096477 5.188006  
H 3.947742 -4.816824 5.633900  
C 0.378418 -3.962556 1.299762  
H 0.271096 -4.555064 0.396507  
C -2.056295 -0.333933 3.400499  
H -2.995962 0.173592 3.227459  
C 1.856186 0.455089 6.141828  
H 2.242671 1.240098 6.783857  
h -0.871667 -3.017605 6.654285  
h 3.702335 -6.410197 3.449892  
h 2.285888 -6.104934 1.094410  
h -2.121652 -3.521685 -0.026453  
h -3.531518 -1.369966 1.151397  
h -2.423750 2.010610 5.051665  
h -0.081620 2.564562 6.510854  
h 4.237935 -0.222164 7.588556  
h 4.723122 -2.911805 7.462535  
h -2.610525 -7.898537 -1.063681  
h 0.525552 -9.356991 1.194673

#### Conf LM1-<sup>2</sup>Cpd 0

N -3.781801 -5.025591 4.007525  
H -4.564263 -5.044218 4.655731  
C -2.503266 -4.470957 4.495931  
H -1.864613 -4.214314 3.637387  
C -2.759745 -3.167121 5.306089  
H -3.221571 -3.463763 6.257325  
H -1.777527 -2.774659 5.579575  
N -3.116729 -0.743317 4.718386  
H -2.128146 -0.498439 4.875186  
C -3.582130 -2.055004 4.713979  
C -4.136103 0.087993 4.341671  
H -4.020776 1.155150 4.250949  
N -5.253779 -0.606460 4.099266  
C -4.903438 -1.941384 4.318568  
H -5.594111 -2.719280 4.076547  
C -1.687157 -5.441241 5.416828  
O -1.103349 -4.973796 6.415871  
S 0.093084 -0.637594 5.235126  
H 2.080538 0.967852 0.963473  
O 2.914017 -0.514137 1.948548  
O 2.535804 0.158916 0.635166  
FE 1.605812 -0.400823 3.323203  
N 1.881895 -2.353109 3.645904

|   |           |           |          |    |           |           |          |    |           |           |           |
|---|-----------|-----------|----------|----|-----------|-----------|----------|----|-----------|-----------|-----------|
| N | -0.030236 | -0.758376 | 2.142599 | O  | -1.088369 | -4.967750 | 6.403878 | O  | 0.353193  | 1.189199  | -1.873611 |
| N | 1.315527  | 1.606694  | 3.011894 | S  | 0.008345  | -0.657297 | 5.327678 | H  | 0.554963  | 0.822983  | -0.969176 |
| N | 3.164476  | -0.006074 | 4.504160 | H  | 2.312476  | 0.893390  | 0.670895 | C  | -1.818964 | 0.146895  | -2.437339 |
| C | 2.677844  | -2.954943 | 4.610853 | O  | 3.164787  | -0.490668 | 1.794663 | H  | -1.391497 | -0.294791 | -3.345054 |
| C | 2.499629  | -4.409934 | 4.560427 | O  | 2.762915  | 0.057265  | 0.426084 | H  | -2.887918 | 0.326535  | -2.603836 |
| C | 1.634796  | -4.667505 | 3.523595 | FE | 1.603676  | -0.380058 | 3.246597 | H  | -1.739121 | -0.574236 | -1.621018 |
| C | 1.219658  | -3.370866 | 2.993855 | N  | 1.880261  | -2.343528 | 3.572584 | S  | -1.010929 | -0.924642 | 5.076340  |
| C | -0.461795 | -2.010209 | 1.760858 | N  | -0.012966 | -0.757380 | 2.069629 | H  | 1.100222  | 1.166635  | 1.465517  |
| C | -1.742517 | -1.918446 | 1.066155 | N  | 1.323398  | 1.619681  | 2.954873 | O  | 1.543336  | -0.744887 | 1.579056  |
| C | -2.097850 | -0.581642 | 1.020476 | N  | 3.170367  | 0.023770  | 4.434330 | O  | 1.379144  | 0.549121  | 0.746176  |
| C | -1.011485 | 0.136561  | 1.715046 | C  | 2.673928  | -2.931466 | 4.548974 | FE | 0.434073  | -0.873923 | 3.167615  |
| C | 0.176768  | 2.194998  | 2.484153 | C  | 2.496522  | -4.387153 | 4.515201 | N  | 0.428774  | -2.863031 | 2.807438  |
| C | 0.304035  | 3.644772  | 2.492992 | C  | 1.637297  | -4.658353 | 3.475963 | N  | -1.224070 | -0.598039 | 2.017011  |
| C | 1.544413  | 3.947402  | 3.041792 | C  | 1.224850  | -3.370244 | 2.928620 | N  | 0.496071  | 1.145204  | 3.527112  |
| C | 2.163521  | 2.657695  | 3.383408 | C  | -0.452324 | -2.013941 | 1.696450 | N  | 2.072571  | -1.168398 | 4.373705  |
| C | 3.803304  | 1.220442  | 4.606800 | C  | -1.740621 | -1.919472 | 1.025971 | C  | 1.318705  | -3.826920 | 3.262112  |
| C | 4.929337  | 1.113745  | 5.530749 | C  | -2.097725 | -0.580788 | 0.988441 | C  | 0.980145  | -5.131899 | 2.703468  |
| C | 4.923565  | -0.182030 | 6.008229 | C  | -1.005488 | 0.138701  | 1.664559 | C  | -0.152557 | -4.955620 | 1.943001  |
| C | 3.840607  | -0.885401 | 5.335039 | C  | 0.177622  | 2.199454  | 2.437330 | C  | -0.494547 | -3.535859 | 2.024574  |
| C | 3.565620  | -2.253604 | 5.418747 | C  | 0.295172  | 3.648938  | 2.452575 | C  | -1.939510 | -1.600794 | 1.390028  |
| H | 4.156334  | -2.832816 | 6.121009 | C  | 1.540725  | 3.958182  | 2.988597 | C  | -3.096937 | -1.040898 | 0.685501  |
| C | 0.185154  | -3.200230 | 2.079883 | C  | 2.172406  | 2.674016  | 3.317965 | C  | -3.079244 | 0.327350  | 0.900444  |
| H | -0.218221 | -4.107168 | 1.645135 | C  | 3.819787  | 1.244646  | 4.529415 | C  | -1.896989 | 0.580569  | 1.754839  |
| C | -0.911446 | 1.502538  | 1.948570 | C  | 4.937422  | 1.135140  | 5.458712 | C  | -0.440351 | 2.092196  | 3.123733  |
| H | -1.752461 | 2.126193  | 1.696297 | C  | 4.913999  | -0.156479 | 5.952518 | C  | -0.137420 | 3.389073  | 3.718689  |
| C | 3.374114  | 2.420587  | 4.030479 | C  | 3.834232  | -0.857687 | 5.274004 | C  | 0.981350  | 3.222437  | 4.520953  |
| H | 4.059964  | 3.247270  | 4.151431 | C  | 3.554268  | -2.224802 | 5.359981 | C  | 1.359504  | 1.802722  | 4.399413  |
| h | 0.304418  | 0.432538  | 6.080407 | H  | 4.135290  | -2.800995 | 6.072264 | C  | 2.723003  | -0.187284 | 5.097562  |
| h | 2.927534  | -5.125664 | 5.262349 | C  | 0.190533  | -3.205509 | 2.014398 | C  | 3.780741  | -0.779616 | 5.923239  |
| h | 1.275492  | -5.612398 | 3.115987 | H  | -0.220431 | -4.113464 | 1.590298 | C  | 3.755077  | -2.139421 | 5.694933  |
| h | -2.281103 | -2.791596 | 0.697914 | C  | -0.912414 | 1.502875  | 1.910086 | C  | 2.690953  | -2.365423 | 4.714135  |
| h | -3.008317 | -0.238984 | 0.528846 | H  | -1.764127 | 2.120375  | 1.680046 | C  | 2.346635  | -3.593077 | 4.168300  |
| h | -0.488363 | 4.302724  | 2.136241 | C  | 3.391096  | 2.442985  | 3.951231 | H  | 2.916815  | -4.455801 | 4.490632  |
| h | 1.897977  | 4.971233  | 3.163567 | H  | 4.076195  | 3.270606  | 4.066981 | C  | -1.600926 | -2.951816 | 1.417854  |
| h | 5.599598  | 1.938537  | 5.772692 | h  | 0.250113  | 0.431666  | 6.140116 | H  | -2.264796 | -3.639352 | 0.905068  |
| h | 5.544974  | -0.605775 | 6.797126 | h  | 2.925594  | -5.096939 | 5.222425 | C  | -1.515436 | 1.815805  | 2.280538  |
| h | -3.851284 | -5.641168 | 3.222534 | h  | 1.271194  | -5.608478 | 3.086993 | H  | -2.162049 | 2.653732  | 2.047330  |
| h | -1.675361 | -6.510855 | 5.207418 | h  | -2.285969 | -2.792348 | 0.667154 | C  | 2.396800  | 1.165596  | 5.083316  |
|   |           |           |          | h  | -3.015475 | -0.238687 | 0.510142 | H  | 3.020460  | 1.786601  | 5.720051  |
|   |           |           |          | h  | -0.506006 | 4.303560  | 2.109573 | O  | 3.545721  | 0.299078  | -1.092062 |
|   |           |           |          | h  | 1.886958  | 4.984154  | 3.113377 | H  | 3.676130  | -0.654287 | -0.777308 |
|   |           |           |          | h  | 5.613983  | 1.955791  | 5.697172 | H  | 2.927323  | 0.686031  | -0.427929 |
|   |           |           |          | h  | 5.526937  | -0.576994 | 6.749727 | O  | 3.405816  | -1.938220 | 0.173106  |
|   |           |           |          | h  | -3.852470 | -5.641662 | 3.222166 | H  | 3.206802  | -2.859036 | -0.061915 |
|   |           |           |          | h  | -1.678674 | -6.506440 | 5.207518 | H  | 2.710699  | -1.571485 | 0.811021  |
|   |           |           |          |    |           |           |          | O  | 2.526355  | 0.802442  | -3.349278 |
|   |           |           |          |    |           |           |          | H  | 1.586822  | 0.872508  | -3.032795 |
|   |           |           |          |    |           |           |          | H  | 3.092052  | 0.581467  | -2.507825 |
|   |           |           |          |    |           |           |          | h  | -1.346052 | -2.209098 | 5.453448  |
|   |           |           |          |    |           |           |          | h  | 1.550477  | -6.042290 | 2.887797  |
|   |           |           |          |    |           |           |          | h  | -0.715302 | -5.688827 | 1.365254  |
|   |           |           |          |    |           |           |          | h  | -3.774105 | -1.658707 | 0.095738  |
|   |           |           |          |    |           |           |          | h  | -3.735454 | 1.130056  | 0.564115  |
|   |           |           |          |    |           |           |          | h  | -0.735763 | 4.279662  | 3.526587  |
|   |           |           |          |    |           |           |          | h  | 1.530759  | 3.914336  | 5.159305  |
|   |           |           |          |    |           |           |          | h  | 4.460669  | -0.206608 | 6.553657  |

  

|                        |           |           |          |
|------------------------|-----------|-----------|----------|
| <b>Conf LM1-4Cpd 0</b> |           |           |          |
| N                      | -3.786072 | -5.026299 | 4.007590 |
| H                      | -4.573725 | -5.041903 | 4.649054 |
| C                      | -2.513950 | -4.464528 | 4.504114 |
| H                      | -1.878294 | -4.187198 | 3.649397 |
| C                      | -2.793132 | -3.178353 | 5.333384 |
| H                      | -3.269222 | -3.495994 | 6.270759 |
| H                      | -1.819466 | -2.782569 | 5.631695 |
| N                      | -3.155956 | -0.747469 | 4.803806 |
| H                      | -2.169965 | -0.507789 | 5.002859 |
| C                      | -3.613091 | -2.060192 | 4.747627 |
| C                      | -4.166086 | 0.089283  | 4.418918 |
| H                      | -4.055995 | 1.159563  | 4.364316 |
| N                      | -5.272144 | -0.602567 | 4.120268 |
| C                      | -4.922389 | -1.942650 | 4.312538 |
| H                      | -5.602427 | -2.714653 | 4.026037 |
| C                      | -1.686486 | -5.436237 | 5.414088 |

  

|                      |           |          |           |
|----------------------|-----------|----------|-----------|
| <b>WT Conf S -RC</b> |           |          |           |
| C                    | 1.973546  | 3.027600 | -5.884230 |
| H                    | 1.698849  | 3.683102 | -6.714525 |
| H                    | 1.074564  | 2.480414 | -5.574464 |
| C                    | 3.001385  | 2.031174 | -6.403667 |
| O                    | 3.473827  | 2.178531 | -7.564138 |
| O                    | 3.326104  | 1.003412 | -5.634677 |
| H                    | 2.924488  | 0.928769 | -4.572338 |
| C                    | -1.083558 | 1.434020 | -2.057735 |
| H                    | -1.472737 | 1.832303 | -1.112967 |

h 4.393315 -2.908059 6.130724  
h 2.308619 3.646370 -5.051814  
h -1.168657 2.191685 -2.836688

### Conf S -TSoo

C 1.988692 2.994370 -5.849001  
H 1.714959 3.636292 -6.691113  
H 1.088743 2.450913 -5.531644  
C 3.032504 1.982182 -6.339711  
O 3.491568 2.140855 -7.518943  
O 3.354599 0.994748 -5.551241  
H 2.888751 0.853419 -4.224157  
C -1.076447 1.426380 -2.117755  
H -1.467106 1.806776 -1.165457  
O 0.354224 1.185673 -1.936929  
H 0.586585 0.886611 -0.993755  
C -1.810476 0.143876 -2.516895  
H -1.400379 -0.270139 -3.445354  
H -2.884420 0.317565 -2.656735  
H -1.701935 -0.598589 -1.723262  
S -0.977518 -0.934971 5.076098  
H 1.135384 1.304565 1.189815  
O 1.566263 -0.720789 1.776484  
O 1.385371 0.702162 0.457493  
FE 0.496026 -0.847281 3.123776  
N 0.433293 -2.856150 2.823000  
N -1.185143 -0.602907 2.013521  
N 0.499172 1.128515 3.584294  
N 2.087987 -1.156454 4.407122  
C 1.331490 -3.814176 3.279901  
C 0.998717 -5.118582 2.720698  
C -0.132609 -4.948586 1.955610  
C -0.480011 -3.533153 2.032221  
C -1.902368 -1.602087 1.379043  
C -3.050114 -1.035026 0.667987  
C -3.031120 0.330726 0.890738  
C -1.853187 0.578623 1.751657  
C -0.411184 2.076995 3.140857  
C -0.101437 3.380839 3.717680  
C 1.001913 3.216326 4.539780  
C 1.367408 1.791999 4.446524  
C 2.739300 -0.182310 5.136494  
C 3.798657 -0.780203 5.952728  
C 3.770843 -2.137796 5.713978  
C 2.704158 -2.356947 4.734891  
C 2.358478 -3.581389 4.185118  
H 2.929509 -4.444761 4.502810  
C -1.576693 -2.952478 1.408647  
H -2.235946 -3.637760 0.888072  
C -1.474250 1.808778 2.282233  
H -2.107976 2.650907 2.033458  
C 2.406965 1.166593 5.132707  
H 3.029851 1.790272 5.766342  
O 3.495982 0.241800 -1.040355  
H 3.650002 -0.703397 -0.713935  
H 2.822520 0.614192 -0.388194

O 3.367435 -1.952817 0.280419  
H 3.151251 -2.878818 0.083400  
H 2.698829 -1.563847 0.924299  
O 2.550612 0.722100 -3.213710  
H 1.588033 0.851488 -2.963692  
H 3.118571 0.470747 -2.281043  
h -1.333907 -2.214070 5.451917  
h 1.568909 -6.028665 2.906966  
h -0.690989 -5.685347 1.378149  
h -3.723589 -1.648937 0.069981  
h -3.688505 1.133634 0.557198  
h -0.681874 4.277188 3.499238  
h 1.548322 3.913653 5.174790  
h 4.480887 -0.210529 6.583680  
h 4.406352 -2.910407 6.146723  
h 2.316801 3.627327 -5.024516  
h -1.171347 2.199376 -2.880341

### Conf S -TShooH

C 1.970622 3.029501 -5.894627  
H 1.696895 3.685232 -6.725237  
H 1.070083 2.485188 -5.583394  
C 2.997382 2.027199 -6.412915  
O 3.472221 2.183928 -7.574538  
O 3.310779 1.000254 -5.647536  
H 2.900555 0.906369 -4.538460  
C -1.062566 1.445544 -2.057808  
H -1.446962 1.847899 -1.112647  
O 0.378409 1.211002 -1.883842  
H 0.587036 0.844035 -0.982280  
C -1.791416 0.153186 -2.428564  
H -1.375999 -0.280857 -3.345496  
H -2.864657 0.321995 -2.576787  
H -1.689994 -0.571245 -1.617722  
S -1.019054 -0.929457 5.074894  
H 1.065179 1.178219 1.497429  
O 1.552792 -0.705831 1.569143  
O 1.369059 0.590689 0.762321  
FE 0.425739 -0.880670 3.180768  
N 0.428366 -2.866260 2.807632  
N -1.227553 -0.603446 2.021680  
N 0.483682 1.139446 3.538957  
N 2.064579 -1.173366 4.379999  
C 1.318226 -3.830956 3.262873  
C 0.980585 -5.135210 2.703554  
C -0.151198 -4.959128 1.941783  
C -0.493574 -3.539706 2.022729  
C -1.938984 -1.605812 1.388489  
C -3.094668 -1.046423 0.681613  
C -3.082385 0.320814 0.902880  
C -1.905027 0.574428 1.762981  
C -0.456456 2.085952 3.139838  
C -0.150732 3.382929 3.731816  
C 0.973140 3.217735 4.527833  
C 1.350842 1.798507 4.407115  
C 2.716351 -0.191213 5.102232

C 3.777116 -0.782790 5.923865  
C 3.752543 -2.142651 5.694898  
C 2.686105 -2.369851 4.717850  
C 2.345348 -3.597096 4.169241  
H 2.918070 -4.458946 4.488941  
C -1.597781 -2.956027 1.412421  
H -2.257462 -3.643027 0.893897  
C -1.530942 1.808548 2.296180  
H -2.179278 2.645120 2.063272  
C 2.390090 1.161581 5.088212  
H 3.016546 1.783138 5.721503  
O 3.594987 0.279090 -1.172576  
H 3.572564 -0.672953 -0.734126  
H 3.095320 0.827761 -0.532353  
O 3.217229 -1.742241 0.226232  
H 3.081189 -2.683743 0.036262  
H 2.458478 -1.317680 0.904078  
O 2.533369 0.768680 -3.371442  
H 1.596896 0.860370 -3.053227  
H 3.113703 0.525612 -2.522843  
h -1.347645 -2.215631 5.451896  
h 1.550058 -6.045930 2.888913  
h -0.712545 -5.693010 1.363534  
h -3.768625 -1.663956 0.087895  
h -3.740265 1.122108 0.566447  
h -0.747911 4.274448 3.540410  
h 1.526569 3.911187 5.161006  
h 4.459781 -0.209751 6.551290  
h 4.391243 -2.911103 6.130341  
h 2.307260 3.647974 -5.062622  
h -1.157842 2.200245 -2.838458

### Conf S -Cpdl

C 1.836171 3.330454 -6.269875  
H 1.771401 4.133967 -7.013112  
H 0.824150 2.947987 -6.086300  
C 2.649812 2.173315 -6.874803  
O 3.326019 2.415337 -7.937398  
O 2.539170 1.010954 -6.315734  
H 2.649515 0.723759 -4.654854  
C -1.046168 1.410556 -2.268807  
H -1.320473 1.799143 -1.276304  
O 0.354264 1.052172 -2.256387  
H 0.777997 1.068580 -1.313602  
C -1.898732 0.182861 -2.610095  
H -1.590749 -0.236881 -3.573960  
H -2.972046 0.407748 -2.651443  
H -1.746613 -0.576696 -1.839321  
S -1.108267 -0.898517 5.174251  
H 1.568963 0.577592 0.676646  
O 1.611565 -0.701585 1.983509  
O 1.665462 1.151712 -0.114833  
FE 0.552409 -0.893518 3.261427  
N 0.424955 -2.888268 2.980115  
N -1.115722 -0.632591 2.103336  
N 0.545115 1.081527 3.741071

N 2.048375 -1.208138 4.615970  
C 1.331564 -3.850413 3.406108  
C 1.014254 -5.143814 2.822119  
C -0.120419 -4.971123 2.063159  
C -0.473655 -3.562831 2.165314  
C -1.852599 -1.609702 1.464055  
C -2.973439 -1.027664 0.726478  
C -2.921247 0.338819 0.932755  
C -1.748676 0.563026 1.803779  
C -0.288278 2.041802 3.214073  
C 0.031429 3.359087 3.754700  
C 1.066601 3.187355 4.656258  
C 1.387787 1.751776 4.618441  
C 2.715963 -0.241784 5.347591  
C 3.799824 -0.837444 6.120770  
C 3.786897 -2.189082 5.844273  
C 2.700169 -2.401884 4.895324  
C 2.365977 -3.614923 4.305287  
H 2.964258 -4.473539 4.584332  
C -1.550488 -2.967464 1.519390  
H -2.207630 -3.642916 0.982609  
C -1.333768 1.783115 2.323587  
H -1.919404 2.647505 2.034412  
C 2.388986 1.110062 5.342378  
H 3.008861 1.730282 5.981819  
O 3.856476 0.592257 -1.391122  
H 3.871098 -0.332089 -1.038122  
H 2.599437 1.070601 -0.527732  
O 3.106941 -1.764346 -0.134428  
H 2.383716 -1.989948 -0.749478  
H 2.702638 -1.454946 0.714385  
O 2.604494 0.578551 -3.664277  
H 1.673955 0.655230 -3.334323  
H 3.519707 0.607946 -2.352067  
h -1.447887 -2.183396 5.545856  
h 1.589413 -6.053444 2.994842  
h -0.664992 -5.701526 1.464813  
h -3.643950 -1.630826 0.114370  
h -3.553890 1.153288 0.579954  
h -0.467873 4.264066 3.408609  
h 1.585456 3.885148 5.313480  
h 4.499616 -0.272658 6.736703  
h 4.434365 -2.962201 6.257963  
h 2.209136 3.763590 -5.341782  
h -1.172308 2.212001 -2.996709

**Conf S –Fe RS**

C 1.798276 3.326209 -6.259630  
H 1.735602 4.116771 -7.015953  
H 0.783551 2.957987 -6.063478  
C 2.592396 2.150417 -6.848331  
O 3.274866 2.363141 -7.908676  
O 2.458103 0.993998 -6.271792  
H 2.403833 0.781680 -4.686612  
C -1.025580 1.468472 -2.090462  
H -1.395510 1.873741 -1.139859

O 0.420487 1.250546 -1.949766  
H 0.653789 0.918337 -1.045300  
C -1.749900 0.168311 -2.441929  
H -1.343969 -0.265733 -3.362607  
H -2.826714 0.327429 -2.575264  
H -1.628422 -0.551911 -1.629866  
S -1.052464 -0.920361 5.095979  
H 0.887966 1.283312 1.482110  
O 1.609863 -0.504705 1.544094  
O 1.261531 0.742162 0.745632  
FE 0.403365 -0.855873 3.237796  
N 0.433342 -2.830740 2.824662  
N -1.224670 -0.577807 2.047004  
N 0.445144 1.157805 3.606581  
N 2.050175 -1.145738 4.416301  
C 1.320348 -3.799750 3.286253  
C 0.986389 -5.102019 2.724460  
C -0.141955 -4.926162 1.956822  
C -0.485247 -3.508416 2.035298  
C -1.926849 -1.577368 1.396023  
C -3.073020 -1.016898 0.676556  
C -3.068669 0.348194 0.907319  
C -1.909211 0.599352 1.790213  
C -0.505863 2.100669 3.222104  
C -0.212761 3.392772 3.830085  
C 0.936119 3.236852 4.591923  
C 1.321441 1.820734 4.461880  
C 2.703344 -0.162302 5.139217  
C 3.769958 -0.752287 5.951927  
C 3.745418 -2.113160 5.723955  
C 2.677313 -2.341962 4.751903  
C 2.340311 -3.568755 4.200123  
H 2.909971 -4.431306 4.523172  
C -1.585020 -2.926296 1.416947  
H -2.238924 -3.611514 0.889404  
C -1.559678 1.827487 2.351079  
H -2.197562 2.664886 2.097907  
C 2.372740 1.189124 5.128402  
H 3.006328 1.813295 5.751550  
O 4.067596 -0.134647 -2.035838  
H 3.504170 -0.931760 -0.926874  
H 4.577145 0.632785 -1.723546  
O 3.106271 -1.484301 -0.134877  
H 3.149141 -2.441836 -0.273039  
H 2.278130 -0.993169 0.832621  
O 2.420764 0.693533 -3.675299  
H 1.561416 0.835787 -3.209297  
H 3.393105 0.171271 -2.801459  
h -1.363836 -2.213435 5.463882  
h 1.556184 -6.012800 2.908516  
h -0.698990 -5.661750 1.376573  
h -3.732449 -1.631941 0.064231  
h -3.722912 1.148963 0.562645  
h -0.848297 4.270247 3.710920  
h 1.507841 3.938446 5.199349  
h 4.455738 -0.179570 6.576240

h 4.388549 -2.880960 6.153991  
h 2.186747 3.771580 -5.343770  
h -1.142435 2.218927 -2.872273

**MT Conf S –RC**

C 1.886526 3.000914 -5.764405  
H 1.553152 3.616554 -6.604169  
H 1.019902 2.436889 -5.396254  
C 2.929174 2.020340 -6.282957  
O 3.356844 2.168884 -7.471207  
O 3.298439 1.038829 -5.492191  
H 2.809984 0.890946 -4.160362  
C -1.075800 1.515050 -1.930606  
H -1.451864 1.902205 -0.978681  
O 0.368979 1.279715 -1.759949  
H 0.569115 0.922147 -0.854614  
C -1.787348 0.222064 -2.332500  
H -1.382992 -0.172760 -3.272360  
H -2.865456 0.377625 -2.455493  
H -1.660524 -0.529686 -1.550926  
S -1.204592 -0.998757 5.011104  
H 1.190649 1.189008 1.576046  
O 1.553404 -0.736204 1.664733  
O 1.451000 0.571655 0.848360  
FE 0.385132 -0.872382 3.198684  
N 0.397046 -2.852871 2.808813  
N -1.231909 -0.572290 2.007241  
N 0.463840 1.146470 3.564505  
N 1.994897 -1.179596 4.447909  
C 1.288061 -3.818407 3.258199  
C 0.967533 -5.112260 2.665997  
C -0.155337 -4.927131 1.890169  
C -0.507815 -3.512656 1.993566  
C -1.946780 -1.568143 1.365967  
C -3.106707 -0.998303 0.673161  
C -3.089612 0.367241 0.907643  
C -1.902800 0.610916 1.756811  
C -0.449156 2.109133 3.136439  
C -0.126504 3.411207 3.711842  
C 0.984163 3.233874 4.522673  
C 1.333774 1.803358 4.431762  
C 2.655468 -0.201244 5.167716  
C 3.725216 -0.797089 5.973772  
C 3.705681 -2.155176 5.729703  
C 2.629228 -2.377267 4.762119  
C 2.301845 -3.594763 4.184633  
H 2.883494 -4.456174 4.489109  
C -1.604717 -2.918786 1.375509  
H -2.258615 -3.597489 0.838505  
C -1.520077 1.842946 2.288665  
H -2.143431 2.689625 2.034369  
C 2.346785 1.156542 5.141156  
H 2.974726 1.776012 5.775025  
O 3.473338 0.128511 -1.015119  
H 3.581659 -0.832407 -0.699792  
H 2.923864 0.560840 -0.314755



|   |           |           |           |   |           |           |           |   |           |           |          |
|---|-----------|-----------|-----------|---|-----------|-----------|-----------|---|-----------|-----------|----------|
| O | 3.321342  | -2.063487 | 0.280107  | C | 3.722693  | -0.808722 | 5.956685  | N | 1.932387  | -1.238391 | 4.681167 |
| H | 3.084197  | -2.984851 | 0.086544  | C | 3.697230  | -2.166520 | 5.712658  | C | 1.234995  | -3.863770 | 3.415244 |
| H | 2.653219  | -1.646349 | 0.918783  | C | 2.615785  | -2.384980 | 4.749764  | C | 0.924320  | -5.146632 | 2.804529 |
| O | 2.476787  | 0.758045  | -3.151951 | C | 2.281200  | -3.602553 | 4.179073  | C | -0.197166 | -4.956143 | 2.027560 |
| H | 1.540221  | 0.963277  | -2.844514 | H | 2.864731  | -4.462993 | 4.480889  | C | -0.551481 | -3.549648 | 2.150251 |
| H | 3.051074  | 0.443543  | -2.287069 | C | -1.623191 | -2.944832 | 1.361530  | C | -1.914191 | -1.580040 | 1.449840 |
| h | -1.460889 | -2.293583 | 5.413700  | H | -2.274342 | -3.623358 | 0.822125  | C | -3.022118 | -0.979006 | 0.707381 |
| h | 1.544718  | -6.020579 | 2.838858  | C | -1.526932 | 1.813955  | 2.272568  | C | -2.948973 | 0.387497  | 0.911647 |
| h | -0.708915 | -5.648244 | 1.288825  | H | -2.141837 | 2.662113  | 2.006391  | C | -1.777392 | 0.595438  | 1.787493 |
| h | -3.787909 | -1.605379 | 0.076932  | C | 2.337689  | 1.144323  | 5.135172  | C | -0.361007 | 2.047193  | 3.261092 |
| h | -3.746382 | 1.172726  | 0.579142  | H | 2.971039  | 1.768968  | 5.757449  | C | -0.037983 | 3.359606  | 3.815522 |
| h | -0.703899 | 4.310951  | 3.499375  | O | 3.496662  | 0.210623  | -1.016729 | C | 1.031204  | 3.179429  | 4.674787 |
| h | 1.543841  | 3.926628  | 5.151099  | H | 3.618431  | -0.737790 | -0.692551 | C | 1.314761  | 1.733966  | 4.660346 |
| h | 4.418283  | -0.227995 | 6.593334  | H | 2.869544  | 0.616961  | -0.345036 | C | 2.619379  | -0.275476 | 5.396951 |
| h | 4.362859  | -2.920256 | 6.143025  | O | 3.316982  | -1.995923 | 0.314464  | C | 3.722095  | -0.872281 | 6.138945 |
| h | 2.232280  | 3.662456  | -4.970124 | H | 3.020933  | -2.889789 | 0.073871  | C | 3.706303  | -2.224194 | 5.854049 |
| h | -1.188006 | 2.283762  | -2.695170 | H | 2.663815  | -1.585394 | 0.960549  | C | 2.598310  | -2.431921 | 4.930475 |

**Conf S -TSoo**

|    |           |           |           |
|----|-----------|-----------|-----------|
| C  | 1.899198  | 3.013054  | -5.796328 |
| H  | 1.567198  | 3.636646  | -6.631111 |
| H  | 1.031741  | 2.445048  | -5.435656 |
| C  | 2.944130  | 2.036131  | -6.322124 |
| O  | 3.362615  | 2.191110  | -7.515375 |
| O  | 3.321429  | 1.057592  | -5.536483 |
| H  | 2.830400  | 0.889982  | -4.147470 |
| C  | -1.056463 | 1.518497  | -1.970508 |
| H  | -1.411738 | 1.906132  | -1.009667 |
| O  | 0.382092  | 1.275673  | -1.833758 |
| H  | 0.625408  | 0.973026  | -0.899815 |
| C  | -1.786782 | 0.230219  | -2.357819 |
| H  | -1.404206 | -0.165553 | -3.306424 |
| H  | -2.866938 | 0.389496  | -2.457732 |
| H  | -1.640479 | -0.522792 | -1.580838 |
| S  | -1.184796 | -1.010144 | 5.007882  |
| H  | 1.189526  | 1.317452  | 1.305615  |
| O  | 1.513268  | -0.751577 | 1.804896  |
| O  | 1.436339  | 0.736605  | 0.553913  |
| FE | 0.414926  | -0.861736 | 3.129448  |
| N  | 0.365519  | -2.870104 | 2.807475  |
| N  | -1.237939 | -0.598790 | 1.991012  |
| N  | 0.431125  | 1.113225  | 3.585424  |
| N  | 1.986128  | -1.184197 | 4.440925  |
| C  | 1.263905  | -3.829400 | 3.259764  |
| C  | 0.945619  | -5.125762 | 2.674014  |
| C  | -0.175099 | -4.946689 | 1.893418  |
| C  | -0.531597 | -3.534788 | 1.989340  |
| C  | -1.956053 | -1.595010 | 1.349699  |
| C  | -3.113202 | -1.022255 | 0.657488  |
| C  | -3.092402 | 0.342675  | 0.890167  |
| C  | -1.906789 | 0.585038  | 1.739116  |
| C  | -0.465326 | 2.073953  | 3.131578  |
| C  | -0.136202 | 3.382293  | 3.690336  |
| C  | 0.973122  | 3.210724  | 4.502664  |
| C  | 1.314365  | 1.777325  | 4.432838  |
| C  | 2.651625  | -0.210181 | 5.157751  |

**Conf S -CpdI**

|    |           |           |           |
|----|-----------|-----------|-----------|
| C  | 1.850863  | 3.226362  | -6.106360 |
| H  | 1.608990  | 3.980126  | -6.863632 |
| H  | 0.924022  | 2.699580  | -5.844445 |
| C  | 2.807613  | 2.213129  | -6.737690 |
| O  | 3.318216  | 2.491750  | -7.878786 |
| O  | 2.996913  | 1.089510  | -6.111730 |
| H  | 2.708806  | 0.787877  | -4.451826 |
| C  | -1.063543 | 1.463138  | -2.138107 |
| H  | -1.342246 | 1.823264  | -1.139438 |
| O  | 0.339425  | 1.110259  | -2.126910 |
| H  | 0.769549  | 1.172124  | -1.194416 |
| C  | -1.896611 | 0.237230  | -2.534407 |
| H  | -1.585885 | -0.133434 | -3.518105 |
| H  | -2.973019 | 0.448692  | -2.565524 |
| H  | -1.734361 | -0.557042 | -1.801774 |
| S  | -1.372000 | -0.992170 | 5.102220  |
| H  | 1.556509  | 0.655980  | 0.795507  |
| O  | 1.555067  | -0.695087 | 2.068142  |
| O  | 1.673612  | 1.248428  | 0.021793  |
| FE | 0.453278  | -0.900757 | 3.302556  |
| N  | 0.331477  | -2.893802 | 2.991238  |
| N  | -1.173655 | -0.609062 | 2.105537  |
| N  | 0.446241  | 1.070024  | 3.800741  |

**WT-Conf S1 -RC**

|   |           |          |           |
|---|-----------|----------|-----------|
| C | 2.855527  | 3.380949 | -5.250311 |
| H | 2.048109  | 2.661831 | -5.100134 |
| H | 3.786079  | 2.794764 | -5.256956 |
| C | 2.733215  | 4.034702 | -6.611606 |
| O | 3.097912  | 5.184936 | -6.921188 |
| O | 2.226623  | 3.225098 | -7.574440 |
| H | 1.729053  | 2.380684 | -7.241154 |
| C | -0.866901 | 1.609147 | -2.031624 |
| H | -1.167262 | 1.981077 | -1.047245 |

|    |           |           |           |                      |           |           |           |    |           |           |           |
|----|-----------|-----------|-----------|----------------------|-----------|-----------|-----------|----|-----------|-----------|-----------|
| O  | 0.566237  | 1.257462  | -1.962764 | H                    | -2.060636 | 2.821584  | 1.928242  | H  | -8.920658 | -2.144240 | 3.916259  |
| H  | 0.807049  | 0.892633  | -1.053771 | C                    | 2.437552  | 1.237072  | 5.004325  | C  | -3.268423 | -6.274156 | 4.105193  |
| C  | -1.678155 | 0.375213  | -2.435529 | H                    | 3.085259  | 1.851029  | 5.624658  | O  | -2.414894 | -5.975328 | 4.963613  |
| H  | -1.325869 | -0.017861 | -3.396330 | O                    | 0.833346  | 1.190596  | -6.765519 | S  | -1.020476 | -0.820760 | 5.028323  |
| H  | -2.748811 | 0.593959  | -2.514542 | H                    | 0.956664  | 0.850653  | -5.808638 | H  | 0.785594  | 1.333159  | 1.065253  |
| H  | -1.563700 | -0.397368 | -1.671966 | H                    | 0.854299  | 0.488403  | -7.441632 | O  | 1.472456  | -0.661358 | 1.675309  |
| N  | -5.169558 | -5.639488 | 2.547888  | O                    | 1.257796  | 0.419121  | -4.333307 | O  | 1.308200  | 0.809814  | 0.417308  |
| H  | -6.055130 | -5.949745 | 2.924640  | H                    | 1.008331  | 0.774044  | -3.405334 | Fe | 0.463573  | -0.739886 | 3.066089  |
| C  | -4.140273 | -5.135485 | 3.476138  | H                    | 1.886991  | -0.316579 | -4.221688 | N  | 0.397617  | -2.760810 | 2.748693  |
| H  | -3.453340 | -4.452454 | 2.956248  | h                    | -1.349919 | -2.104838 | 5.391952  | N  | -1.205667 | -0.459469 | 1.963923  |
| C  | -4.825685 | -4.326759 | 4.625436  | h                    | 1.466974  | -5.963859 | 2.803262  | N  | 0.492431  | 1.229748  | 3.548760  |
| H  | -4.022907 | -4.004579 | 5.296248  | h                    | -0.748333 | -5.546359 | 1.223991  | N  | 2.090996  | -1.081726 | 4.308125  |
| H  | -5.458002 | -5.012756 | 5.203533  | h                    | -3.743811 | -1.460368 | -0.031088 | C  | 1.276250  | -3.735467 | 3.198532  |
| C  | -5.655825 | -3.150547 | 4.152133  | h                    | -3.623165 | 1.328461  | 0.392351  | C  | 0.920300  | -5.036160 | 2.634541  |
| C  | -5.047084 | -2.005586 | 3.606210  | h                    | -0.771416 | 4.364185  | 3.644580  | C  | -0.193617 | -4.833708 | 1.852091  |
| H  | -3.965142 | -1.943699 | 3.530045  | h                    | 1.571135  | 3.979424  | 5.159539  | C  | -0.520702 | -3.410352 | 1.948479  |
| C  | -5.822831 | -0.925292 | 3.169034  | h                    | 4.593176  | -0.142580 | 6.331203  | C  | -1.925243 | -1.445398 | 1.317642  |
| H  | -5.327639 | -0.059334 | 2.742108  | h                    | 4.467496  | -2.846372 | 5.931768  | C  | -3.049577 | -0.854511 | 0.585516  |
| C  | -7.219996 | -0.968617 | 3.276868  | h                    | -5.087079 | -5.625941 | 1.551402  | C  | -2.989552 | 0.514925  | 0.781468  |
| H  | -7.821307 | -0.121927 | 2.954858  | h                    | -3.480988 | -7.287028 | 3.766030  | C  | -1.830723 | 0.737157  | 1.674831  |
| C  | -7.058568 | -3.182252 | 4.255221  | h                    | 2.900602  | 4.030986  | -4.376533 | C  | -0.416103 | 2.192267  | 3.138152  |
| H  | -7.541732 | -4.053963 | 4.690571  | h                    | -0.941965 | 2.419769  | -2.756416 | C  | -0.116474 | 3.478870  | 3.765847  |
| C  | -7.837490 | -2.101025 | 3.822647  |                      |           |           |           | C  | 1.015319  | 3.295477  | 4.542931  |
| H  | -8.918254 | -2.139982 | 3.917887  |                      |           |           |           | C  | 1.379079  | 1.871002  | 4.403296  |
| C  | -3.267785 | -6.273356 | 4.105265  | <b>Conf S1 –TSoo</b> |           |           |           | C  | 2.784212  | -0.114879 | 5.005369  |
| O  | -2.414973 | -5.974938 | 4.964482  | C                    | 2.866219  | 3.377042  | -5.250016 | C  | 3.883872  | -0.719363 | 5.762986  |
| S  | -1.018476 | -0.817408 | 5.021796  | H                    | 2.074263  | 2.640790  | -5.098096 | C  | 3.829236  | -2.077343 | 5.530749  |
| H  | 0.948151  | 1.279545  | 1.316281  | H                    | 3.809046  | 2.810203  | -5.261401 | C  | 2.710812  | -2.287018 | 4.607102  |
| O  | 1.468788  | -0.629755 | 1.497984  | C                    | 2.733387  | 4.028570  | -6.610949 | C  | 2.328438  | -3.510776 | 4.077136  |
| O  | 1.220178  | 0.622935  | 0.635813  | O                    | 3.098764  | 5.179098  | -6.921660 | H  | 2.904351  | -4.377820 | 4.377594  |
| Fe | 0.436805  | -0.757047 | 3.073345  | O                    | 2.227291  | 3.218760  | -7.571768 | C  | -1.611627 | -2.802241 | 1.334998  |
| N  | 0.411377  | -2.758266 | 2.720184  | H                    | 1.725331  | 2.370507  | -7.243136 | H  | -2.276954 | -3.472863 | 0.803766  |
| N  | -1.226202 | -0.458790 | 1.958274  | C                    | -0.860960 | 1.600583  | -2.086036 | C  | -1.444156 | 1.958622  | 2.226909  |
| N  | 0.496272  | 1.244010  | 3.500275  | H                    | -1.130815 | 1.963653  | -1.088659 | H  | -2.025776 | 2.821867  | 1.931105  |
| N  | 2.096999  | -1.083049 | 4.266933  | O                    | 0.559650  | 1.224422  | -2.063102 | C  | 2.446578  | 1.233657  | 5.035466  |
| C  | 1.287088  | -3.735431 | 3.168538  | H                    | 0.849452  | 0.915373  | -1.125651 | H  | 3.102633  | 1.850979  | 5.642832  |
| C  | 0.924215  | -5.038125 | 2.612227  | C                    | -1.705203 | 0.384837  | -2.478543 | O  | 0.837745  | 1.185870  | -6.801350 |
| C  | -0.192573 | -4.834439 | 1.834209  | H                    | -1.389405 | -0.002700 | -3.453992 | H  | 0.953496  | 0.825685  | -5.845905 |
| C  | -0.515553 | -3.408359 | 1.928707  | H                    | -2.774908 | 0.618394  | -2.519775 | H  | 0.855389  | 0.499480  | -7.493709 |
| C  | -1.938270 | -1.445810 | 1.309056  | H                    | -1.573056 | -0.398669 | -1.728970 | O  | 1.220516  | 0.374471  | -4.398415 |
| C  | -3.063600 | -0.859496 | 0.572511  | N                    | -5.170206 | -5.639279 | 2.547931  | H  | 0.974899  | 0.743897  | -3.465776 |
| C  | -3.011369 | 0.510161  | 0.772034  | H                    | -6.055650 | -5.950702 | 2.924073  | H  | 1.829485  | -0.376799 | -4.279885 |
| C  | -1.854669 | 0.735682  | 1.668479  | C                    | -4.141743 | -5.136254 | 3.477110  | h  | -1.362581 | -2.104377 | 5.402004  |
| C  | -0.428722 | 2.205074  | 3.111316  | H                    | -3.455230 | -4.451815 | 2.958646  | h  | 1.466069  | -5.960843 | 2.822060  |
| C  | -0.132947 | 3.486867  | 3.748202  | C                    | -4.827820 | -4.329416 | 4.627487  | h  | -0.744699 | -5.544113 | 1.235894  |
| C  | 1.001187  | 3.301856  | 4.523828  | H                    | -4.025244 | -4.008210 | 5.299067  | h  | -3.736228 | -1.452741 | -0.013398 |
| C  | 1.373325  | 1.881127  | 4.369264  | H                    | -5.460087 | -5.016474 | 5.204289  | h  | -3.598073 | 1.335355  | 0.401121  |
| C  | 2.778747  | -0.111839 | 4.972364  | C                    | -5.657902 | -3.152510 | 4.155857  | h  | -0.752444 | 4.357706  | 3.659759  |
| C  | 3.873854  | -0.711777 | 5.742427  | C                    | -5.049001 | -2.005264 | 3.614866  | h  | 1.587777  | 3.976679  | 5.172473  |
| C  | 3.829179  | -2.070200 | 5.509660  | H                    | -3.966879 | -1.942120 | 3.541915  | h  | 4.611572  | -0.152851 | 6.344004  |
| C  | 2.720409  | -2.284705 | 4.575083  | C                    | -5.824660 | -0.924459 | 3.178810  | h  | 4.466842  | -2.856751 | 5.947941  |
| C  | 2.341612  | -3.510272 | 4.046028  | H                    | -5.329482 | -0.056354 | 2.756133  | h  | -5.087258 | -5.625886 | 1.551481  |
| H  | 2.917019  | -4.376911 | 4.349564  | C                    | -7.222071 | -0.969527 | 3.282774  | h  | -3.481655 | -7.287771 | 3.765806  |
| C  | -1.612472 | -2.801797 | 1.322312  | H                    | -7.823476 | -0.122787 | 2.961260  | h  | 2.905937  | 4.027333  | -4.376168 |
| H  | -2.277571 | -3.475051 | 0.793602  | C                    | -7.060885 | -3.185697 | 4.255569  | h  | -0.944502 | 2.424947  | -2.794210 |
| C  | -1.469034 | 1.961795  | 2.215636  | H                    | -7.544337 | -4.059011 | 4.687289  |    |           |           |           |
|    |           |           |           | C                    | -7.839713 | -2.104008 | 3.824026  |    |           |           |           |

**Conf S1 –IC1**

C 2.741751 3.375854 -5.345399  
H 1.852481 2.745935 -5.243428  
H 3.597020 2.685116 -5.345075  
C 2.726751 4.062542 -6.699713  
O 3.053800 5.243665 -6.935490  
O 2.358469 3.263507 -7.723940  
H 1.931471 2.329675 -7.481613  
C -0.802202 1.563341 -2.312244  
H -0.903967 1.853136 -1.260567  
O 0.584141 1.130560 -2.543928  
H 1.043113 0.937172 -1.655363  
C -1.743671 0.408889 -2.657654  
H -1.581005 0.080428 -3.689746  
H -2.798247 0.676531 -2.533795  
H -1.540871 -0.426879 -1.983304  
N -5.169423 -5.637878 2.547852  
H -6.053331 -5.951397 2.925971  
C -4.139817 -5.133707 3.474771  
H -3.451978 -4.451811 2.954018  
C -4.822830 -4.316660 4.618791  
H -4.021283 -4.006685 5.296889  
H -5.470718 -4.993418 5.190394  
C -5.629236 -3.127014 4.137284  
C -4.995864 -1.995361 3.591302  
H -3.912436 -1.953291 3.521795  
C -5.747877 -0.901194 3.147917  
H -5.233404 -0.045215 2.723093  
C -7.146168 -0.916305 3.250835  
H -7.728676 -0.057729 2.925838  
C -7.032678 -3.131384 4.233093  
H -7.534934 -3.992807 4.667324  
C -7.788253 -2.035322 3.795986  
H -8.869950 -2.052402 3.887845  
C -3.266975 -6.270933 4.105694  
O -2.414565 -5.969854 4.964345  
S -1.045191 -0.791359 5.078904  
H 1.561132 0.324720 0.730841  
O 1.585266 -0.401928 1.892553  
O 1.691459 0.853340 -0.200385  
Fe 0.595748 -0.714626 3.219939  
N 0.512204 -2.716183 2.876303  
N -1.044290 -0.426010 2.040282  
N 0.584792 1.250495 3.749398  
N 2.158507 -1.052545 4.509696  
C 1.391295 -3.691343 3.325978  
C 1.042298 -4.987942 2.753448  
C -0.074895 -4.789153 1.974974  
C -0.400718 -3.367088 2.064726  
C -1.762072 -1.399643 1.377574  
C -2.853858 -0.793891 0.610132  
C -2.778932 0.574406 0.808514  
C -1.639434 0.781973 1.732706  
C -0.287863 2.212715 3.278468  
C -0.000817 3.506163 3.902679  
C 1.111433 3.327642 4.707702

C 1.462046 1.897572 4.602054  
C 2.856190 -0.085897 5.209240  
C 3.969922 -0.692077 5.939239  
C 3.925354 -2.045425 5.680840  
C 2.797775 -2.254941 4.773378  
C 2.432505 -3.473381 4.218503  
H 3.009024 -4.342116 4.513895  
C -1.472524 -2.760792 1.418934  
H -2.128333 -3.430365 0.872737  
C -1.265581 1.993701 2.311866  
H -1.809973 2.871317 1.985207  
C 2.521988 1.261805 5.247563  
H 3.181344 1.880441 5.849800  
O 1.159874 1.120137 -7.229987  
H 1.096073 0.663889 -6.318147  
H 1.044352 0.555230 -8.020222  
O 0.992485 0.104583 -4.877951  
H 0.843032 0.566906 -3.971104  
H 1.443578 -0.742190 -4.713936  
h -1.376469 -2.083829 5.431212  
h 1.592255 -5.911359 2.934875  
h -0.639183 -5.502795 1.374674  
h -3.535370 -1.388845 0.002154  
h -3.378999 1.400253 0.426462  
h -0.648508 4.376720 3.799268  
h 1.680380 4.016310 5.332283  
h 4.701070 -0.131376 6.521565  
h 4.564858 -2.829818 6.085597  
h -5.087039 -5.625510 1.551342  
h -3.478369 -7.284887 3.766168  
h 2.832623 4.001008 -4.457148  
h -0.933972 2.452857 -2.928251

**Conf S1 –Cpdl**

C 2.693520 3.404852 -5.422171  
H 1.786968 2.796028 -5.324994  
H 3.527014 2.687102 -5.419014  
C 2.696174 4.067841 -6.808812  
O 2.955449 5.299445 -6.990560  
O 2.438014 3.240972 -7.794577  
H 1.702097 1.908838 -7.481331  
C -0.794766 1.553644 -2.342612  
H -0.869471 1.839491 -1.291159  
O 0.587959 1.112791 -2.515488  
H 1.253430 1.238128 -0.890735  
C -1.749488 0.406306 -2.687091  
H -1.608296 0.090314 -3.725437  
H -2.802991 0.669962 -2.538481  
H -1.523057 -0.439873 -2.032404  
N -5.170961 -5.638543 2.548316  
H -6.054461 -5.955923 2.924648  
C -4.145547 -5.135915 3.477121  
H -3.463422 -4.445062 2.961177  
C -4.833514 -4.329199 4.626298  
H -4.034921 -4.019198 5.308210  
H -5.478132 -5.012563 5.192849

C -5.645955 -3.141744 4.149044  
C -5.019277 -2.007752 3.600855  
H -3.936104 -1.963660 3.528381  
C -5.775164 -0.915410 3.160269  
H -5.267180 -0.055888 2.734255  
C -7.172876 -0.935221 3.268318  
H -7.759657 -0.079567 2.944364  
C -7.048777 -3.150586 4.249812  
H -7.547159 -4.013803 4.684493  
C -7.808823 -2.056635 3.815202  
H -8.889980 -2.077748 3.908842  
C -3.261220 -6.268571 4.101226  
O -2.399430 -5.957963 4.948093  
S -1.087414 -0.782877 5.114286  
H 1.473750 0.685088 0.623704  
O 1.711928 -0.556231 2.015783  
O 1.333584 1.478720 0.064730  
Fe 0.653203 -0.760172 3.272151  
N 0.522698 -2.762236 2.957194  
N -0.967532 -0.457340 2.081296  
N 0.652613 1.197358 3.795870  
N 2.170559 -1.109958 4.606586  
C 1.400429 -3.746724 3.399738  
C 1.055075 -5.035264 2.818046  
C -0.058968 -4.829480 2.035553  
C -0.375497 -3.409856 2.131718  
C -1.705111 -1.421282 1.415472  
C -2.783277 -0.805787 0.639327  
C -2.682049 0.560662 0.823941  
C -1.542075 0.751918 1.746787  
C -0.199275 2.167708 3.321313  
C 0.067424 3.454135 3.961823  
C 1.167829 3.274297 4.780005  
C 1.515585 1.847754 4.669840  
C 2.888070 -0.151160 5.295483  
C 4.005563 -0.754240 6.009330  
C 3.956750 -2.107471 5.743363  
C 2.819126 -2.310899 4.856978  
C 2.444632 -3.523837 4.287720  
H 3.031397 -4.391501 4.566286  
C -1.429961 -2.782148 1.466277  
H -2.085583 -3.443001 0.908576  
C -1.151672 1.959760 2.321443  
H -1.648292 2.851171 1.958810  
C 2.562829 1.203164 5.317425  
H 3.227832 1.820565 5.913984  
O 1.143005 1.053900 -7.331484  
H 0.925493 0.495555 -5.922717  
H 0.983117 0.601926 -8.188960  
O 0.811799 0.114901 -4.977510  
H 0.728545 0.806896 -3.464311  
H 1.410022 -0.643439 -4.851664  
h -1.415038 -2.076106 5.467228  
h 1.600318 -5.961314 3.000276  
h -0.617924 -5.540788 1.427542  
h -3.461077 -1.392408 0.019223

|   |           |           |           |   |           |           |          |   |           |           |          |
|---|-----------|-----------|-----------|---|-----------|-----------|----------|---|-----------|-----------|----------|
| h | -3.261826 | 1.394441  | 0.428040  | C | -1.944002 | -1.438327 | 1.251733 | N | -5.164485 | -5.584629 | 2.434061 |
| h | -0.585035 | 4.320242  | 3.851266  | C | -3.067301 | -0.849370 | 0.515667 | H | -6.040652 | -5.919714 | 2.812498 |
| h | 1.734170  | 3.966276  | 5.403295  | C | -3.019987 | 0.518628  | 0.726173 | C | -4.146004 | -5.071868 | 3.366762 |
| h | 4.741716  | -0.194787 | 6.586528  | C | -1.863320 | 0.742603  | 1.621483 | H | -3.408023 | -4.459164 | 2.828834 |
| h | 4.596155  | -2.893502 | 6.145087  | C | -0.448693 | 2.206204  | 3.078276 | C | -4.821930 | -4.148508 | 4.438335 |
| h | -5.087486 | -5.625693 | 1.551903  | C | -0.144055 | 3.491078  | 3.703971 | H | -5.627233 | -4.718060 | 4.918359 |
| h | -3.473898 | -7.283919 | 3.766707  | C | 0.995249  | 3.307783  | 4.472065 | H | -4.072419 | -3.960714 | 5.212918 |
| h | 2.800866  | 4.017118  | -4.526809 | C | 1.356373  | 1.883004  | 4.330242 | N | -4.646917 | -1.733587 | 3.611197 |
| h | -0.934516 | 2.449354  | -2.947790 | C | 2.736312  | -0.116358 | 4.963462 | H | -3.661093 | -1.571106 | 3.815347 |

**MT-Conf S1 –RC**

C 2.867322 3.397346 -5.232230  
H 2.060937 2.676182 -5.086219  
H 3.801700 2.817354 -5.260448  
C 2.732715 4.094821 -6.572801  
O 3.246448 5.189512 -6.873102  
O 2.042844 3.413692 -7.520151  
H 1.528177 2.561837 -7.232354  
C -0.854994 1.661381 -2.074813  
H -1.110563 2.021119 -1.073466  
O 0.569683 1.260109 -2.063152  
H 0.825572 0.886182 -1.168631  
C -1.718439 0.465164 -2.481979  
H -1.418575 0.091098 -3.467276  
H -2.783701 0.718346 -2.511633  
H -1.602756 -0.332348 -1.745062  
N -5.163106 -5.584652 2.434035  
H -6.038500 -5.920908 2.813230  
C -4.142728 -5.071288 3.365298  
H -3.404657 -4.460154 2.825505  
C -4.817542 -4.146474 4.436787  
H -5.623582 -4.716187 4.915387  
H -4.067748 -3.960474 5.211514  
N -4.646753 -1.730105 3.611182  
H -3.659241 -1.568730 3.807096  
C -5.388948 -2.880317 3.886954  
C -5.495463 -0.809816 3.041423  
H -5.160210 0.154680 2.702695  
N -6.735135 -1.295119 2.932756  
C -6.672855 -2.581997 3.469238  
H -7.551547 -3.202724 3.541859  
C -3.333575 -6.208619 4.074955  
O -2.540953 -5.905923 4.989015  
S -1.167697 -0.865796 4.953061  
H 0.960614 1.283219 1.280060  
O 1.493970 -0.615261 1.510323  
O 1.230067 0.608976 0.615291  
FE 0.407317 -0.759919 3.043981  
N 0.373928 -2.761798 2.704584  
N -1.232382 -0.453012 1.906066  
N 0.470953 1.241732 3.472799  
N 2.043308 -1.089180 4.270085  
C 1.236202 -3.742726 3.171900  
C 0.872611 -5.046080 2.617927  
C -0.232038 -4.838763 1.822270  
C -0.547277 -3.409787 1.904586

C -1.944002 -1.438327 1.251733  
C -3.067301 -0.849370 0.515667  
C -3.019987 0.518628 0.726173  
C -1.863320 0.742603 1.621483  
C -0.448693 2.206204 3.078276  
C -0.144055 3.491078 3.703971  
C 0.995249 3.307783 4.472065  
C 1.356373 1.883004 4.330242  
C 2.736312 -0.116358 4.963462  
C 3.834973 -0.715722 5.727574  
C 3.788189 -2.074264 5.497177  
C 2.668798 -2.290311 4.576875  
C 2.282713 -3.517150 4.058520  
H 2.854665 -4.382169 4.372350  
C -1.631213 -2.797081 1.279911  
H -2.292703 -3.465407 0.741020  
C -1.488549 1.964763 2.182863  
H -2.084555 2.823253 1.902463  
C 2.410982 1.236310 4.977667  
H 3.064401 1.850930 5.591025  
O 0.671721 1.340310 -6.913890  
H 0.765546 0.943446 -5.978481  
H 0.633133 0.675948 -7.627402  
O 1.072233 0.405967 -4.506184  
H 0.920522 0.776635 -3.567908  
H 1.480590 -0.473171 -4.417995  
h -1.431885 -2.156273 5.364427  
h 1.413109 -5.972833 2.810429  
h -0.779565 -5.548217 1.201822  
h -3.752623 -1.448213 -0.084156  
h -3.642329 1.336482 0.363032  
h -0.783857 4.367028 3.597060  
h 1.575555 3.988135 5.095308  
h 4.556294 -0.146063 6.313452  
h 4.443571 -2.846958 5.899029  
h -5.074477 -5.588566 1.437993  
h -3.516223 -7.226142 3.729481  
h 2.931348 4.035542 -4.350940  
h -0.922505 2.494167 -2.774796

**Conf S1 –TSoo**

C 2.859350 3.390983 -5.240046  
H 2.048550 2.674643 -5.091994  
H 3.788861 2.802885 -5.268514  
C 2.730571 4.088049 -6.582009  
O 3.249284 5.182068 -6.879046  
O 2.043205 3.411119 -7.532861  
H 1.522463 2.555771 -7.255312  
C -0.843742 1.650146 -2.159717  
H -1.068919 1.987216 -1.142515  
O 0.567845 1.232305 -2.196717  
H 0.882471 0.941295 -1.267260  
C -1.733818 0.473044 -2.568412  
H -1.464829 0.119505 -3.569947  
H -2.797872 0.733860 -2.562268  
H -1.598590 -0.342973 -1.855150

N -5.164485 -5.584629 2.434061  
H -6.040652 -5.919714 2.812498  
C -4.146004 -5.071868 3.366762  
H -3.408023 -4.459164 2.828834  
C -4.821930 -4.148508 4.438335  
H -5.627233 -4.718060 4.918359  
H -4.072419 -3.960714 5.212918  
N -4.646917 -1.733587 3.611197  
H -3.661093 -1.571106 3.815347  
C -5.391819 -2.882451 3.886656  
C -5.491654 -0.815071 3.032495  
H -5.155292 0.149690 2.695164  
N -6.730889 -1.300049 2.918377  
C -6.672753 -2.585111 3.459564  
H -7.552374 -3.204890 3.528767  
C -3.335136 -6.208771 4.075190  
O -2.539878 -5.905084 4.986672  
S -1.179045 -0.869272 4.962215  
H 0.797673 1.353224 0.958403  
O 1.504063 -0.607759 1.693050  
O 1.367823 0.884773 0.308068  
FE 0.478230 -0.752050 3.018539  
N 0.378827 -2.770343 2.729278  
N -1.177002 -0.467603 1.897759  
N 0.489546 1.213337 3.532157  
N 2.053121 -1.094902 4.318126  
C 1.244786 -3.747955 3.198722  
C 0.885573 -5.050741 2.643263  
C -0.215390 -4.846186 1.841608  
C -0.533522 -3.420337 1.921410  
C -1.900627 -1.448664 1.246438  
C -3.015937 -0.850845 0.508807  
C -2.957380 0.516478 0.717421  
C -1.799305 0.732567 1.612587  
C -0.408200 2.178154 3.104400  
C -0.109868 3.467122 3.727742  
C 1.020141 3.287594 4.507624  
C 1.376114 1.859720 4.382508  
C 2.754141 -0.129306 5.011481  
C 3.855026 -0.735185 5.761272  
C 3.801548 -2.091795 5.522920  
C 2.676171 -2.300377 4.609839  
C 2.287885 -3.523946 4.087447  
H 2.858167 -4.390199 4.399493  
C -1.608251 -2.808475 1.284013  
H -2.272798 -3.474819 0.747095  
C -1.424686 1.949799 2.180595  
H -2.002646 2.813531 1.882139  
C 2.430787 1.221536 5.032167  
H 3.086452 1.837201 5.640979  
O 0.664171 1.342705 -6.965134  
H 0.765776 0.924700 -6.034352  
H 0.615845 0.695429 -7.694176  
O 1.064999 0.377337 -4.593705  
H 0.904440 0.748607 -3.646830  
H 1.502293 -0.487687 -4.509360

h -1.451876 -2.157123 5.376159  
h 1.425899 -5.977435 2.836533  
h -0.760149 -5.557112 1.220410  
h -3.704689 -1.443564 -0.093165  
h -3.576891 1.336991 0.355438  
h -0.750770 4.342299 3.621078  
h 1.598513 3.972284 5.127909  
h 4.581623 -0.169705 6.344672  
h 4.453213 -2.869219 5.921683  
h -5.074857 -5.588559 1.438107  
h -3.518632 -7.226413 3.730515  
h 2.929261 4.030221 -4.359958  
h -0.922764 2.505068 -2.831230

**Conf S1 –IC1**

C 2.774437 3.368212 -5.266182  
H 1.909018 2.715708 -5.123477  
H 3.655011 2.709317 -5.285655  
C 2.700876 4.062246 -6.615067  
O 3.221183 5.162037 -6.890772  
O 2.062799 3.378682 -7.592622  
H 1.525371 2.513867 -7.354512  
C -0.802688 1.626322 -2.341262  
H -0.895184 1.907159 -1.286045  
O 0.572568 1.164419 -2.576572  
H 1.053428 1.023279 -1.688448  
C -1.769683 0.496899 -2.699901  
H -1.624361 0.189111 -3.740615  
H -2.818158 0.781590 -2.562530  
H -1.579177 -0.355578 -2.043525  
N -5.164488 -5.583306 2.434081  
H -6.039830 -5.919404 2.813668  
C -4.146512 -5.067810 3.365503  
H -3.406299 -4.459468 2.825464  
C -4.819661 -4.133923 4.429514  
H -5.633419 -4.693588 4.906793  
H -4.072769 -3.949955 5.207472  
N -4.613673 -1.725884 3.589036  
H -3.630198 -1.567827 3.807510  
C -5.373194 -2.864491 3.868190  
C -5.444467 -0.801766 2.999109  
H -5.094795 0.157622 2.659381  
N -6.688600 -1.273438 2.881665  
C -6.648126 -2.555399 3.431491  
H -7.535032 -3.164806 3.498572  
C -3.336733 -6.203232 4.078785  
O -2.543371 -5.896904 4.990930  
S -1.216823 -0.845232 5.021067  
H 1.554813 0.506728 0.594319  
O 1.595138 -0.462460 1.896801  
O 1.698850 1.087916 -0.237239  
FE 0.566294 -0.750176 3.185345  
N 0.449492 -2.751242 2.854244  
N -1.052442 -0.435766 1.992781  
N 0.572023 1.209184 3.727496  
N 2.095608 -1.107040 4.508431

C 1.310187 -3.739636 3.314378  
C 0.951204 -5.031527 2.736785  
C -0.150435 -4.814931 1.939247  
C -0.460849 -3.389392 2.032418  
C -1.783980 -1.400364 1.327133  
C -2.864156 -0.779813 0.556432  
C -2.775597 0.586346 0.761214  
C -1.632995 0.778251 1.683212  
C -0.286167 2.182339 3.254768  
C 0.006737 3.469979 3.884783  
C 1.122737 3.285125 4.680824  
C 1.453332 1.851664 4.580920  
C 2.810822 -0.148128 5.203528  
C 3.928116 -0.762207 5.916438  
C 3.875580 -2.113187 5.648084  
C 2.734305 -2.312822 4.758249  
C 2.350998 -3.528222 4.208242  
H 2.926440 -4.398364 4.500720  
C -1.521211 -2.765234 1.381039  
H -2.186848 -3.423684 0.833455  
C -1.251849 1.983956 2.272413  
H -1.777607 2.874133 1.947733  
C 2.498708 1.204579 5.234774  
H 3.167156 1.818799 5.831267  
O 0.634221 1.327512 -7.171827  
H 0.726170 0.813691 -6.282532  
H 0.551267 0.756761 -7.963032  
O 0.911124 0.171762 -4.912963  
H 0.816964 0.598156 -3.977649  
H 1.056101 -0.784041 -4.824949  
h -1.478374 -2.140334 5.419374  
h 1.489434 -5.961484 2.919963  
h -0.700357 -5.513886 1.309077  
h -3.554660 -1.362997 -0.052803  
h -3.376062 1.419272 0.395508  
h -0.654858 4.331895 3.798411  
h 1.709271 3.977616 5.284563  
h 4.664219 -0.206726 6.497523  
h 4.529087 -2.896718 6.031586  
h -5.074859 -5.588204 1.438132  
h -3.517707 -7.221262 3.733922  
h 2.880766 4.006046 -4.388726  
h -0.920621 2.527799 -2.942508

**Conf S1 –CpdI**

C 2.759185 3.416110 -5.342270  
H 1.902011 2.748060 -5.213110  
H 3.647187 2.765147 -5.375149  
C 2.670099 4.112569 -6.709959  
O 3.178982 5.261363 -6.913805  
O 2.091759 3.416148 -7.656440  
H 1.251095 2.185130 -7.439031  
C -0.814618 1.589194 -2.367637  
H -0.887011 1.863425 -1.311896  
O 0.547843 1.101530 -2.541571  
H 1.390995 1.211446 -1.018880

C -1.809075 0.482178 -2.735785  
H -1.691705 0.197525 -3.785894  
H -2.852619 0.770559 -2.564914  
H -1.599827 -0.392930 -2.114769  
N -5.168239 -5.583041 2.434184  
H -6.043176 -5.924090 2.810828  
C -4.157007 -5.067997 3.369066  
H -3.421805 -4.449722 2.833979  
C -4.839921 -4.144186 4.437049  
H -5.648827 -4.712841 4.910906  
H -4.096854 -3.955954 5.218143  
N -4.648107 -1.739889 3.586088  
H -3.668409 -1.578014 3.806783  
C -5.403846 -2.879228 3.876134  
C -5.485228 -0.819309 2.995934  
H -5.143181 0.141876 2.652667  
N -6.726418 -1.295830 2.888072  
C -6.681020 -2.574934 3.444021  
H -7.566470 -3.185362 3.516893  
C -3.335052 -6.199180 4.076703  
O -2.530607 -5.882920 4.976385  
S -1.240179 -0.847077 5.022629  
H 1.641813 0.645945 0.484850  
O 1.676229 -0.582106 1.974289  
O 1.700580 1.425924 -0.103400  
FE 0.601067 -0.779926 3.215923  
N 0.452458 -2.780662 2.901832  
N -1.008119 -0.456795 2.017401  
N 0.609033 1.175952 3.750025  
N 2.099991 -1.143003 4.565551  
C 1.315272 -3.774877 3.350949  
C 0.961094 -5.060374 2.765113  
C -0.138223 -4.838687 1.964266  
C -0.445474 -3.416854 2.066857  
C -1.753932 -1.412870 1.349114  
C -2.828750 -0.787781 0.577295  
C -2.723013 0.577079 0.771519  
C -1.580071 0.759502 1.690559  
C -0.233917 2.153833 3.278101  
C 0.044784 3.438664 3.915753  
C 1.150947 3.253191 4.723858  
C 1.480910 1.822222 4.620283  
C 2.826066 -0.190657 5.253902  
C 3.945376 -0.799764 5.957316  
C 3.894903 -2.150996 5.680069  
C 2.748805 -2.346936 4.803754  
C 2.363142 -3.556757 4.236766  
H 2.951678 -4.424493 4.510185  
C -1.493910 -2.777440 1.402842  
H -2.158575 -3.429894 0.845933  
C -1.189818 1.960137 2.277527  
H -1.683078 2.858122 1.926538  
C 2.516134 1.168150 5.274126  
H 3.186654 1.779990 5.869911  
O 0.598725 1.376657 -7.326166  
H 0.674341 0.684848 -5.937326

H 0.519243 0.853533 -8.151697  
O 0.816133 0.225118 -5.032793  
H 0.686490 0.795892 -3.492646  
H 1.572736 -0.383147 -5.086502  
h -1.497771 -2.141177 5.426728  
h 1.497020 -5.991419 2.949520  
h -0.687969 -5.531662 1.327374  
h -3.515067 -1.366055 -0.041278  
h -3.308353 1.414771 0.392422  
h -0.614337 4.300447 3.811081  
h 1.732951 3.946706 5.330796  
h 4.683956 -0.244595 6.535548  
h 4.547733 -2.935068 6.063618  
h -5.075896 -5.588131 1.438484  
h -3.517279 -7.218553 3.736500  
h 2.866610 4.032965 -4.450072  
h -0.928500 2.500141 -2.955237

**WT-Conf S2 -RC-**

C 2.429143 3.138050 -5.295100  
H 1.476517 2.607727 -5.189917  
H 3.204823 2.359749 -5.270858  
C 2.474727 3.801321 -6.660033  
O 2.762394 4.985152 -6.898398  
O 2.171278 2.975810 -7.702699  
H 1.892492 2.026715 -7.447358  
C -0.990974 1.535119 -1.976119  
H -1.201936 1.884910 -0.960815  
O 0.441857 1.149671 -2.037048  
H 0.741859 0.812346 -1.144058  
C -1.857004 0.328179 -2.336596  
H -1.587431 -0.049900 -3.329771  
H -2.924842 0.571212 -2.330702  
H -1.704875 -0.461605 -1.597608  
N -5.215937 -5.820105 2.647495  
H -6.136168 -6.016233 3.008922  
C -4.185527 -5.302711 3.568038  
H -3.467603 -4.673475 3.023102  
C -4.870992 -4.414779 4.653165  
H -4.083650 -4.121549 5.353524  
H -5.572050 -5.043082 5.219253  
C -5.596942 -3.197783 4.116509  
C -4.903072 -2.015861 3.795554  
H -3.823277 -1.964694 3.900768  
C -5.593558 -0.877587 3.361907  
H -5.033696 0.017417 3.115638  
C -6.988612 -0.901420 3.234131  
H -7.521250 -0.009154 2.912905  
C -6.996239 -3.210662 3.973138  
H -7.548882 -4.110124 4.234295  
C -7.691473 -2.076503 3.532549  
H -8.772599 -2.108470 3.429545  
C -3.360396 -6.430308 4.283655  
O -2.517473 -6.093228 5.137772  
S -1.084065 -0.863640 5.187463  
H 0.968568 1.272853 1.393252

O 1.486638 -0.623886 1.680371  
O 1.199547 0.568976 0.745159  
Fe 0.407912 -0.755952 3.231334  
N 0.377671 -2.751423 2.885571  
N -1.248315 -0.457508 2.102639  
N 0.470426 1.245193 3.652860  
N 2.031621 -1.084127 4.474830  
C 1.259026 -3.725295 3.331543  
C 0.915848 -5.023969 2.756589  
C -0.208971 -4.827884 1.989387  
C -0.546586 -3.405989 2.094085  
C -1.973536 -1.447946 1.472699  
C -3.114733 -0.867047 0.757610  
C -3.062625 0.503766 0.953332  
C -1.882258 0.735856 1.817043  
C -0.422109 2.214632 3.215499  
C -0.109301 3.508303 3.819920  
C 0.980650 3.314333 4.653332  
C 1.331195 1.883441 4.537400  
C 2.698689 -0.116436 5.199447  
C 3.770853 -0.722314 5.997105  
C 3.728134 -2.080291 5.759014  
C 2.641149 -2.289600 4.799999  
C 2.285363 -3.509502 4.243042  
H 2.854881 -4.378366 4.549253  
C -1.650967 -2.804730 1.495596  
H -2.322548 -3.481446 0.977764  
C -1.477961 1.966343 2.338870  
H -2.079203 2.825597 2.066882  
C 2.367454 1.235306 5.213685  
H 2.998524 1.848556 5.851634  
O 1.369502 0.570752 -7.063353  
H 1.207599 0.395444 -6.074097  
H 0.657688 0.223183 -7.635630  
O 0.914210 0.082613 -4.488150  
H 0.824396 0.565780 -3.601887  
H 0.918812 -0.872386 -4.298167  
h -1.386029 -2.158981 5.555233  
h 1.483377 -5.939617 2.922623  
h -0.760000 -5.548410 1.385005  
h -3.811508 -1.473944 0.179469  
h -3.695177 1.318046 0.599929  
h -0.685813 4.409365 3.610667  
h 1.526667 3.989440 5.312242  
h 4.477789 -0.161956 6.608911  
h 4.361656 -2.858754 6.184117  
h -5.130978 -5.888179 1.653453  
h -3.583634 -7.457319 3.994726  
h 2.576699 3.774152 -4.422364  
h -1.111467 2.367835 -2.669033

**Conf S2 -TSoo**

C 2.434154 3.140480 -5.297993  
H 1.484492 2.606211 -5.187983  
H 3.212368 2.364750 -5.273291  
C 2.473908 3.800546 -6.664440

O 2.759927 4.984614 -6.906094  
O 2.168394 2.973093 -7.704370  
H 1.888296 2.023339 -7.445167  
C -0.988304 1.528172 -2.023929  
H -1.183850 1.868427 -1.001751  
O 0.432877 1.131712 -2.107619  
H 0.764154 0.839609 -1.186389  
C -1.870586 0.331016 -2.380653  
H -1.616166 -0.041775 -3.379562  
H -2.937410 0.578370 -2.357644  
H -1.706946 -0.465328 -1.651069  
N -5.215529 -5.820446 2.647649  
H -6.135227 -6.018065 3.009609  
C -4.184974 -5.303250 3.567687  
H -3.467025 -4.674441 3.022418  
C -4.869047 -4.414444 4.653017  
H -4.080528 -4.120392 5.351722  
H -5.568735 -5.042440 5.221059  
C -5.596800 -3.198634 4.116061  
C -4.904630 -2.016039 3.794089  
H -3.824899 -1.963810 3.899516  
C -5.596480 -0.879005 3.359404  
H -5.038171 0.017019 3.112863  
C -6.991595 -0.904546 3.232243  
H -7.525661 -0.013332 2.910540  
C -6.996083 -3.213257 3.973126  
H -7.547763 -4.113115 4.234868  
C -7.692765 -2.080294 3.531703  
H -8.773779 -2.113791 3.428492  
C -3.359040 -6.430569 4.282971  
O -2.515105 -6.092725 5.135917  
S -1.074709 -0.866224 5.193736  
H 0.783900 1.312074 1.079518  
O 1.481747 -0.618567 1.847937  
O 1.264821 0.744486 0.435734  
Fe 0.452895 -0.738012 3.197352  
N 0.369437 -2.751462 2.898797  
N -1.222324 -0.462253 2.100143  
N 0.469957 1.231321 3.694959  
N 2.035743 -1.078730 4.497885  
C 1.255674 -3.721711 3.346259  
C 0.916189 -5.020104 2.770213  
C -0.206694 -4.826875 1.999124  
C -0.548136 -3.408017 2.102714  
C -1.956319 -1.450193 1.471659  
C -3.093449 -0.862761 0.758839  
C -3.035821 0.506752 0.956808  
C -1.854608 0.733811 1.818894  
C -0.406247 2.200346 3.236414  
C -0.091060 3.498457 3.832096  
C 0.993794 3.307294 4.670588  
C 1.338262 1.874036 4.567795  
C 2.709736 -0.116551 5.220524  
C 3.783371 -0.727321 6.008813  
C 3.734417 -2.084171 5.766785  
C 2.642397 -2.287755 4.812748

C 2.282641 -3.505674 4.255141  
H 2.852715 -4.374586 4.559328  
C -1.647151 -2.807116 1.497002  
H -2.320084 -3.481047 0.978077  
C -1.450685 1.960059 2.345681  
H -2.045641 2.821325 2.068462  
C 2.378050 1.233380 5.240726  
H 3.013656 1.848312 5.871586  
O 1.371549 0.575697 -7.059540  
H 1.208736 0.400713 -6.065389  
H 0.659673 0.227737 -7.631210  
O 0.923477 0.086400 -4.506162  
H 0.809597 0.569504 -3.612417  
H 0.966132 -0.867113 -4.314384  
h -1.391715 -2.157697 5.562450  
h 1.484988 -5.935115 2.935409  
h -0.754499 -5.548734 1.393404  
h -3.792430 -1.464897 0.178387  
h -3.666096 1.323184 0.604303  
h -0.662898 4.400095 3.612740  
h 1.540367 3.985772 5.325564  
h 4.493618 -0.168951 6.618597  
h 4.366698 -2.864895 6.189582  
h -5.130875 -5.888265 1.653564  
h -3.582317 -7.457718 3.994563  
h 2.581755 3.778659 -4.426782  
h -1.114550 2.372173 -2.702008

#### Conf S2 -Cpd1

C 2.367424 3.189251 -5.437137  
H 1.403773 2.674582 -5.339279  
H 3.122630 2.389782 -5.436635  
C 2.420799 3.865360 -6.817894  
O 2.713157 5.091097 -6.964110  
O 2.149251 3.076422 -7.833961  
H 1.671345 1.707686 -7.636602  
C -0.939190 1.491483 -2.281688  
H -0.926804 1.769031 -1.223955  
O 0.409396 1.007504 -2.573493  
H 1.697399 0.878360 -1.237325  
C -1.957859 0.382045 -2.548099  
H -1.942121 0.110419 -3.607085  
H -2.980311 0.667892 -2.277760  
H -1.684008 -0.492485 -1.952293  
N -5.218015 -5.817252 2.647891  
H -6.135879 -6.024081 3.009546  
C -4.192269 -5.298468 3.567761  
H -3.479489 -4.662251 3.023819  
C -4.878242 -4.409975 4.652548  
H -4.092571 -4.118246 5.356008  
H -5.582210 -5.036282 5.216296  
C -5.597953 -3.191974 4.109056  
C -4.896018 -2.018345 3.775475  
H -3.816168 -1.977313 3.883641  
C -5.575652 -0.878094 3.331122  
H -5.011208 0.013023 3.078947

C -6.971309 -0.891389 3.207491  
H -7.497824 0.001699 2.879826  
C -6.996914 -3.194421 3.967773  
H -7.557128 -4.086880 4.235291  
C -7.682551 -2.057824 3.518195  
H -8.763529 -2.081885 3.415041  
C -3.353696 -6.419376 4.281112  
O -2.500629 -6.067147 5.119964  
S -1.090557 -0.816672 5.284132  
H 2.106293 0.439492 0.264190  
O 1.650692 -0.433610 2.125852  
O 2.414989 0.867001 -0.560175  
Fe 0.614634 -0.699741 3.392349  
N 0.511478 -2.698624 3.063186  
N -1.030306 -0.414801 2.224833  
N 0.589249 1.262148 3.928613  
N 2.109147 -1.049756 4.748323  
C 1.393738 -3.678378 3.500772  
C 1.066741 -4.968187 2.907461  
C -0.055235 -4.772214 2.135622  
C -0.390968 -3.356452 2.243715  
C -1.761764 -1.381803 1.568011  
C -2.868641 -0.784153 0.819910  
C -2.801378 0.581677 1.024556  
C -1.643301 0.789777 1.920859  
C -0.241415 2.234904 3.422217  
C 0.054215 3.538170 4.016923  
C 1.095169 3.345051 4.907933  
C 1.429100 1.911062 4.824545  
C 2.783701 -0.095010 5.486246  
C 3.870450 -0.703162 6.246483  
C 3.841367 -2.053962 5.965504  
C 2.747875 -2.252595 5.023251  
C 2.408788 -3.461568 4.424821  
H 2.989519 -4.330017 4.712086  
C -1.465420 -2.742828 1.607519  
H -2.124951 -3.409651 1.061074  
C -1.249914 1.999647 2.482516  
H -1.823751 2.869220 2.186453  
C 2.446200 1.256344 5.514327  
H 3.073621 1.864992 6.158443  
O 1.349600 0.701112 -7.543214  
H 0.802591 0.364285 -6.066030  
H 0.725558 0.449396 -8.260595  
O 0.383722 0.096529 -5.173677  
H 0.484681 0.739460 -3.537780  
H 0.415466 -0.873059 -5.083761  
h -1.403717 -2.118187 5.619299  
h 1.633643 -5.884368 3.072686  
h -0.613222 -5.485035 1.528496  
h -3.540184 -1.383747 0.205432  
h -3.415274 1.404084 0.657343  
h -0.478167 4.444525 3.728554  
h 1.617366 4.022620 5.583416  
h 4.583832 -0.151772 6.858955  
h 4.476780 -2.839723 6.374034

h -5.131582 -5.887377 1.654119  
h -3.576736 -7.448601 4.000018  
h 2.539747 3.796287 -4.548386  
h -1.110094 2.398808 -2.861016

#### MT-Conf S2 -RC

C 2.363827 3.104497 -5.339711  
H 1.404082 2.586531 -5.233088  
H 3.128305 2.314987 -5.320188  
C 2.414320 3.773642 -6.701945  
O 2.712097 4.956858 -6.930683  
O 2.104015 2.959921 -7.750994  
H 1.805736 2.011775 -7.510665  
C -1.055241 1.515571 -2.040038  
H -1.243920 1.858851 -1.018140  
O 0.369822 1.103185 -2.129927  
H 0.678048 0.760109 -1.246744  
C -1.946497 0.327429 -2.400915  
H -1.712950 -0.031925 -3.409669  
H -3.010396 0.583513 -2.358931  
H -1.785784 -0.478706 -1.681627  
N -5.170690 -5.791013 2.665451  
H -6.090198 -5.978093 3.034661  
C -4.128404 -5.297227 3.580182  
H -3.382649 -4.708410 3.027041  
C -4.787446 -4.356353 4.642454  
H -5.578853 -4.920358 5.153774  
H -4.027020 -4.152161 5.400913  
N -4.657676 -1.936047 3.808051  
H -3.669091 -1.757593 3.992815  
C -5.376437 -3.101356 4.081436  
C -5.529723 -1.018582 3.272386  
H -5.214858 -0.042996 2.945115  
N -6.766981 -1.518538 3.181627  
C -6.672865 -2.815962 3.691312  
H -7.538830 -3.454626 3.757622  
C -3.337664 -6.442074 4.307037  
O -2.491326 -6.119756 5.163551  
S -1.264925 -0.945216 5.104388  
H 0.920882 1.226769 1.381045  
O 1.460608 -0.656750 1.703317  
O 1.171223 0.515408 0.747825  
Fe 0.353729 -0.795207 3.222592  
N 0.335558 -2.788352 2.880154  
N -1.277365 -0.493779 2.065647  
N 0.412086 1.206567 3.649605  
N 1.958669 -1.119812 4.497742  
C 1.215880 -3.758885 3.334457  
C 0.884331 -5.057961 2.754079  
C -0.234568 -4.865445 1.977102  
C -0.578217 -3.444607 2.077951  
C -2.001052 -1.487476 1.437621  
C -3.142181 -0.907754 0.721668  
C -3.090018 0.463923 0.914880  
C -1.910404 0.698791 1.777927  
C -0.468966 2.178818 3.194548

|                     |           |           |           |    |           |           |           |                     |           |           |           |
|---------------------|-----------|-----------|-----------|----|-----------|-----------|-----------|---------------------|-----------|-----------|-----------|
| C                   | -0.150119 | 3.476685  | 3.787119  | H  | -5.586593 | -4.923127 | 5.150784  | h                   | -0.730111 | 4.368779  | 3.551657  |
| C                   | 0.939725  | 3.285873  | 4.620840  | H  | -4.037716 | -4.150276 | 5.404345  | h                   | 1.483482  | 3.964551  | 5.248665  |
| C                   | 1.277900  | 1.851044  | 4.524641  | N  | -4.666079 | -1.936101 | 3.809638  | h                   | 4.416913  | -0.184907 | 6.587333  |
| C                   | 2.631847  | -0.147894 | 5.211819  | H  | -3.677520 | -1.758688 | 3.992456  | h                   | 4.288046  | -2.883685 | 6.189219  |
| C                   | 3.709425  | -0.747632 | 6.005249  | C  | -5.384338 | -3.102182 | 4.082302  | h                   | -5.096232 | -5.854176 | 1.670205  |
| C                   | 3.667537  | -2.106804 | 5.774228  | C  | -5.539221 | -1.017638 | 3.276851  | h                   | -3.569510 | -7.461282 | 4.015197  |
| C                   | 2.576541  | -2.322597 | 4.821796  | H  | -5.225808 | -0.040647 | 2.952600  | h                   | 2.537308  | 3.743953  | -4.461646 |
| C                   | 2.231302  | -3.541966 | 4.258297  | N  | -6.776141 | -1.517746 | 3.186823  | h                   | -1.167866 | 2.363389  | -2.729330 |
| H                   | 2.802616  | -4.408631 | 4.566868  | C  | -6.681168 | -2.816418 | 3.694294  | <b>Conf S2 –IC1</b> |           |           |           |
| C                   | -1.679416 | -2.844733 | 1.470373  | H  | -7.546645 | -3.455544 | 3.760501  | C                   | 2.343862  | 3.103734  | -5.378079 |
| H                   | -2.343667 | -3.523232 | 0.946229  | C  | -3.336469 | -6.437170 | 4.306661  | H                   | 1.377213  | 2.597052  | -5.276133 |
| C                   | -1.512183 | 1.930062  | 2.304064  | O  | -2.489858 | -6.110996 | 5.161769  | H                   | 3.098834  | 2.304750  | -5.362930 |
| H                   | -2.109420 | 2.788855  | 2.023405  | S  | -1.260589 | -0.938423 | 5.121062  | C                   | 2.410936  | 3.783167  | -6.735292 |
| C                   | 2.307077  | 1.205136  | 5.212444  | H  | 0.774442  | 1.296912  | 1.116589  | O                   | 2.724171  | 4.967385  | -6.945383 |
| H                   | 2.946372  | 1.822256  | 5.837718  | O  | 1.425741  | -0.668997 | 1.832550  | O                   | 2.104085  | 2.990092  | -7.797923 |
| O                   | 1.253076  | 0.561377  | -7.176254 | O  | 1.178823  | 0.684534  | 0.461098  | H                   | 1.776046  | 2.034025  | -7.600387 |
| H                   | 1.068015  | 0.367537  | -6.196133 | Fe | 0.364721  | -0.780635 | 3.178724  | C                   | -1.007360 | 1.492855  | -2.248073 |
| H                   | 0.560339  | 0.220535  | -7.777366 | N  | 0.303264  | -2.792038 | 2.878534  | H                   | -1.022065 | 1.779895  | -1.190960 |
| O                   | 0.754163  | 0.036871  | -4.615903 | N  | -1.292471 | -0.505095 | 2.063287  | O                   | 0.353536  | 1.026134  | -2.591735 |
| H                   | 0.709505  | 0.510912  | -3.724518 | N  | 0.385518  | 1.192923  | 3.662794  | H                   | 0.841944  | 0.721455  | -1.762410 |
| H                   | 0.701350  | -0.920074 | -4.444441 | N  | 1.939810  | -1.115903 | 4.496477  | C                   | -2.003013 | 0.367476  | -2.524323 |
| h                   | -1.483910 | -2.243171 | 5.518762  | C  | 1.189640  | -3.759118 | 3.333231  | H                   | -1.930517 | 0.051242  | -3.569683 |
| h                   | 1.456466  | -5.969451 | 2.927037  | C  | 0.865886  | -5.057070 | 2.747550  | H                   | -3.036774 | 0.663481  | -2.320215 |
| h                   | -0.775136 | -5.589456 | 1.367462  | C  | -0.247820 | -4.866598 | 1.962248  | H                   | -1.777468 | -0.481111 | -1.874026 |
| h                   | -3.848308 | -1.512369 | 0.152553  | C  | -0.600527 | -3.450042 | 2.068066  | N                   | -5.171745 | -5.789870 | 2.665462  |
| h                   | -3.724189 | 1.277826  | 0.563518  | C  | -2.021292 | -1.498209 | 1.434801  | H                   | -6.090290 | -5.981982 | 3.034937  |
| h                   | -0.724122 | 4.378910  | 3.575985  | C  | -3.164286 | -0.915869 | 0.726323  | C                   | -4.132870 | -5.291152 | 3.580717  |
| h                   | 1.492838  | 3.965913  | 5.268665  | C  | -3.108144 | 0.455180  | 0.918639  | H                   | -3.388005 | -4.700865 | 3.028011  |
| h                   | 4.425520  | -0.185684 | 6.604823  | C  | -1.927494 | 0.688132  | 1.778773  | C                   | -4.795106 | -4.346269 | 4.638655  |
| h                   | 4.306449  | -2.879681 | 6.201451  | C  | -0.484874 | 2.163308  | 3.193627  | H                   | -5.592386 | -4.906188 | 5.144884  |
| h                   | -5.096191 | -5.854008 | 1.670235  | C  | -0.161146 | 3.466019  | 3.773847  | H                   | -4.038626 | -4.142137 | 5.401391  |
| h                   | -3.573890 | -7.464991 | 4.013945  | C  | 0.927281  | 3.279678  | 4.608622  | N                   | -4.643686 | -1.931900 | 3.791201  |
| h                   | 2.523234  | 3.736571  | -4.466132 | C  | 1.259721  | 1.842158  | 4.525605  | H                   | -3.656937 | -1.757751 | 3.985160  |
| h                   | -1.169108 | 2.359021  | -2.720987 | C  | 2.618114  | -0.147683 | 5.207836  | C                   | -5.373403 | -3.089199 | 4.070934  |
| <b>Conf S2–TSoo</b> |           |           |           | C  | 3.697385  | -0.750026 | 5.994892  | C                   | -5.506633 | -1.010111 | 3.247164  |
| C                   | 2.381565  | 3.105866  | -5.331505 | C  | 3.649460  | -2.109097 | 5.764616  | H                   | -5.182754 | -0.037506 | 2.918966  |
| H                   | 1.429735  | 2.576235  | -5.216498 | C  | 2.554550  | -2.321080 | 4.815246  | N                   | -6.747295 | -1.500968 | 3.156502  |
| H                   | 3.156523  | 2.326674  | -5.311793 | C  | 2.205854  | -3.539981 | 4.253737  | C                   | -6.666133 | -2.795247 | 3.675220  |
| C                   | 2.416099  | 3.767824  | -6.697374 | H  | 2.782624  | -4.404491 | 4.556707  | H                   | -7.537645 | -3.425943 | 3.743161  |
| O                   | 2.704978  | 4.951341  | -6.936919 | C  | -1.700087 | -2.853085 | 1.457399  | C                   | -3.338708 | -6.431239 | 4.309843  |
| O                   | 2.102370  | 2.944578  | -7.738111 | H  | -2.362046 | -3.530692 | 0.930515  | O                   | -2.492289 | -6.102130 | 5.163803  |
| H                   | 1.816825  | 1.996270  | -7.482117 | C  | -1.526565 | 1.917674  | 2.301727  | S                   | -1.271390 | -0.912742 | 5.169426  |
| C                   | -1.050275 | 1.520807  | -2.047939 | H  | -2.119060 | 2.777487  | 2.016156  | H                   | 1.537878  | 0.055686  | 0.643351  |
| H                   | -1.245569 | 1.865182  | -1.027359 | C  | 2.293045  | 1.203991  | 5.210473  | O                   | 1.499649  | -0.457143 | 2.029144  |
| O                   | 0.371474  | 1.115286  | -2.128025 | H  | 2.931516  | 1.823160  | 5.833954  | O                   | 1.680544  | 0.389340  | -0.354897 |
| H                   | 0.691681  | 0.812446  | -1.215215 | O  | 1.288314  | 0.547258  | -7.102033 | Fe                  | 0.483684  | -0.748543 | 3.333456  |
| C                   | -1.938297 | 0.328001  | -2.405226 | H  | 1.121652  | 0.372743  | -6.110748 | N                   | 0.404016  | -2.744525 | 2.992447  |
| H                   | -1.685727 | -0.046551 | -3.403909 | H  | 0.579619  | 0.200740  | -7.679023 | N                   | -1.147785 | -0.457584 | 2.146127  |
| H                   | -3.003584 | 0.581550  | -2.383675 | O  | 0.830460  | 0.059874  | -4.542299 | N                   | 0.474980  | 1.221923  | 3.857881  |
| H                   | -1.781366 | -0.469016 | -1.674858 | H  | 0.738878  | 0.542460  | -3.649429 | N                   | 1.997717  | -1.090438 | 4.680582  |
| N                   | -5.170851 | -5.791635 | 2.665439  | H  | 0.838468  | -0.895402 | -4.354686 | C                   | 1.291870  | -3.715250 | 3.435211  |
| H                   | -6.089403 | -5.982922 | 3.034937  | h  | -1.496036 | -2.234177 | 5.533290  | C                   | 0.966855  | -5.006938 | 2.839070  |
| C                   | -4.130515 | -5.295503 | 3.580810  | h  | 1.439058  | -5.968594 | 2.916857  | C                   | -0.155995 | -4.814358 | 2.066950  |
| H                   | -3.386431 | -4.703525 | 3.029025  | h  | -0.780383 | -5.590410 | 1.345370  | C                   | -0.505179 | -3.398772 | 2.179382  |
| C                   | -4.794679 | -4.356944 | 4.642966  | h  | -3.877537 | -1.515562 | 0.160897  | C                   | -1.886080 | -1.437190 | 1.511923  |
|                     |           |           |           | h  | -3.738264 | 1.269811  | 0.561719  |                     |           |           |           |







|    |           |            |           |                     |           |            |           |    |          |           |           |
|----|-----------|------------|-----------|---------------------|-----------|------------|-----------|----|----------|-----------|-----------|
| N  | -2.599786 | -8.397314  | -0.255755 | O                   | 2.702871  | -0.646554  | -4.201191 | C  | 2.221598 | -8.213840 | 2.361647  |
| H  | -3.065064 | -9.243906  | 0.025288  | H                   | 3.428018  | -0.704454  | -2.744499 | H  | 1.329516 | -7.879510 | 1.843491  |
| C  | -1.356425 | -8.067315  | 0.394719  | H                   | 2.223067  | -1.472741  | -4.391662 | C  | 2.116340 | -9.139869 | 3.403852  |
| H  | -0.663555 | -7.574906  | -0.312255 | O                   | 4.371617  | -1.063892  | 2.344150  | H  | 1.146425 | -9.531114 | 3.692476  |
| C  | -1.508783 | -7.053825  | 1.605541  | H                   | 4.801636  | -1.689767  | 2.955085  | C  | 5.108454 | -8.139155 | -0.764846 |
| H  | -0.572752 | -7.043628  | 2.186028  | H                   | 3.446366  | -0.864208  | 2.696964  | O  | 5.252366 | -9.380259 | -0.749330 |
| H  | -1.614194 | -6.056828  | 1.168848  | O                   | 3.823193  | -0.669773  | -1.820020 | S  | 5.076078 | -3.438612 | 3.508767  |
| C  | -2.686805 | -7.304735  | 2.515060  | H                   | 3.371272  | 0.565865   | -1.037875 | H  | 3.856080 | -0.776787 | -0.337143 |
| C  | -2.677469 | -8.322683  | 3.483875  | H                   | 3.595818  | -1.428968  | -1.210284 | O  | 4.539620 | 0.245075  | 1.202619  |
| H  | -1.809137 | -8.969111  | 3.580151  | O                   | 3.087170  | 1.396419   | -0.513552 | O  | 4.458613 | 0.005008  | -0.319763 |
| C  | -3.764439 | -8.488625  | 4.349143  | H                   | 3.772641  | 2.093711   | -0.608492 | Fe | 4.824242 | -1.457398 | 2.253388  |
| H  | -3.738170 | -9.255825  | 5.115052  | H                   | 2.061119  | 1.232259   | 0.582744  | N  | 6.263805 | -2.174659 | 1.051974  |
| C  | -4.887121 | -7.661297  | 4.238896  | h                   | -0.762123 | -2.769337  | 6.722078  | N  | 3.443389 | -2.345151 | 1.075460  |
| H  | -5.732596 | -7.808391  | 4.901296  | h                   | 3.708579  | -6.324688  | 3.603148  | N  | 3.378736 | -0.703863 | 3.425114  |
| C  | -3.820000 | -6.480929  | 2.413244  | h                   | 2.322256  | -6.015079  | 1.244717  | N  | 6.185497 | -0.485711 | 3.319985  |
| H  | -3.845597 | -5.692657  | 1.666181  | h                   | -2.046411 | -3.415791  | -0.039003 | C  | 7.611819 | -2.264509 | 1.368710  |
| C  | -4.915778 | -6.662348  | 3.261051  | h                   | -3.478548 | -1.301594  | 1.132273  | C  | 8.337947 | -2.924322 | 0.278921  |
| H  | -5.786465 | -6.028111  | 3.148502  | h                   | -2.465771 | 2.065468   | 5.020681  | C  | 7.420803 | -3.138262 | -0.729862 |
| C  | -0.653794 | -9.375056  | 0.809074  | h                   | -0.139216 | 2.675289   | 6.511266  | C  | 6.115691 | -2.739348 | -0.202032 |
| O  | -1.270168 | -10.459255 | 0.794773  | h                   | 4.068987  | -0.195362  | 7.872101  | C  | 3.635846 | -2.920611 | -0.174051 |
| S  | -0.584428 | -3.318242  | 5.468494  | h                   | 4.662638  | -2.865534  | 7.647790  | C  | 2.387294 | -3.502893 | -0.654209 |
| H  | 1.474549  | 0.454964   | 1.939821  | h                   | -2.975730 | -7.895301  | -1.034613 | C  | 1.461790 | -3.389445 | 0.373665  |
| O  | 1.857850  | -0.919802  | 3.037099  | h                   | 0.398045  | -9.315866  | 1.088713  | C  | 2.126974 | -2.606217 | 1.430442  |
| O  | 1.275560  | 1.102061   | 1.221351  | h                   | 2.272764  | 3.314597   | -3.413715 | C  | 2.071690 | -1.149445 | 3.463572  |
| Fe | 0.894664  | -1.856756  | 4.055724  | h                   | -1.310657 | 0.907205   | -1.818687 | C  | 1.313017 | -0.401992 | 4.468249  |
| N  | 1.689280  | -3.613272  | 3.488673  |                     |           |            |           | C  | 2.162121 | 0.564160  | 4.983223  |
| N  | -0.585501 | -2.069334  | 2.691540  | <b>Conf LW2 –RC</b> |           |            |           | C  | 3.475785 | 0.321017  | 4.354423  |
| N  | -0.025535 | -0.232919  | 4.804864  | C                   | -0.565605 | 4.256094   | -4.224035 | C  | 5.954242 | 0.546577  | 4.215114  |
| N  | 2.227110  | -1.799771  | 5.561942  | H                   | -1.274943 | 4.944052   | -4.689026 | C  | 7.223590 | 1.052140  | 4.723358  |
| C  | 2.630693  | -4.396710  | 4.156383  | H                   | 0.448685  | 4.645569   | -4.375459 | C  | 8.213643 | 0.248104  | 4.193441  |
| C  | 2.981745  | -5.555936  | 3.340852  | C                   | -0.686079 | 2.924682   | -4.934893 | C  | 7.554963 | -0.706028 | 3.302213  |
| C  | 2.275632  | -5.430319  | 2.163383  | O                   | -1.674302 | 2.621850   | -5.625434 | C  | 8.191183 | -1.624785 | 2.462020  |
| C  | 1.437159  | -4.248832  | 2.298847  | O                   | 0.358728  | 2.059790   | -4.847478 | H  | 9.251592 | -1.790349 | 2.615239  |
| C  | -0.597106 | -2.964752  | 1.630597  | H                   | 1.194222  | 2.355230   | -4.288371 | C  | 4.885453 | -3.020294 | -0.799057 |
| C  | -1.813281 | -2.801852  | 0.830938  | C                   | -0.673071 | -0.341232  | -1.088855 | H  | 4.910251 | -3.457112 | -1.792557 |
| C  | -2.537800 | -1.777528  | 1.408943  | H                   | -0.821948 | -1.419040  | -0.927543 | C  | 1.527909 | -2.079336 | 2.575291  |
| C  | -1.735696 | -1.322483  | 2.562487  | O                   | -0.488265 | 0.350687   | 0.176612  | H  | 0.487013 | -2.332304 | 2.742373  |
| C  | -1.242994 | 0.290148   | 4.409927  | H                   | 0.480298  | 0.373655   | 0.440351  | C  | 4.690538 | 0.941827  | 4.656333  |
| C  | -1.516900 | 1.537865   | 5.117352  | C                   | 0.540774  | -0.165894  | -2.018084 | H  | 4.675706 | 1.766443  | 5.363614  |
| C  | -0.401799 | 1.821972   | 5.885993  | H                   | 1.414844  | -0.640654  | -1.562261 | O  | 4.040138 | 2.161701  | -1.735790 |
| C  | 0.511109  | 0.683261   | 5.696874  | H                   | 0.381640  | -0.628387  | -2.999908 | H  | 4.920794 | 2.568563  | -1.863334 |
| C  | 2.508426  | -0.682447  | 6.329316  | H                   | 0.768040  | 0.892590   | -2.185696 | H  | 4.147092 | 1.294992  | -1.224693 |
| C  | 3.608545  | -0.955288  | 7.240775  | N                   | 2.685307  | -8.499796  | -0.834679 | O  | 2.457747 | 2.787389  | -3.740892 |
| C  | 3.934061  | -2.288847  | 7.077989  | H                   | 2.789950  | -9.405528  | -0.389420 | H  | 3.000382 | 2.520206  | -2.937324 |
| C  | 3.097087  | -2.792089  | 5.993545  | C                   | 3.714110  | -7.504059  | -0.607896 | H  | 2.988255 | 3.246482  | -4.438801 |
| C  | 3.218676  | -4.035056  | 5.363020  | H                   | 3.658432  | -6.708295  | -1.365469 | O  | 1.998145 | 0.991315  | 0.714341  |
| H  | 3.883797  | -4.762008  | 5.816692  | C                   | 3.569320  | -6.762719  | 0.790860  | H  | 2.293937 | 1.623691  | 0.033710  |
| C  | 0.405713  | -3.897882  | 1.415841  | H                   | 4.410328  | -6.070092  | 0.927266  | H  | 2.817517 | 0.647846  | 1.178127  |
| H  | 0.346248  | -4.489768  | 0.510325  | H                   | 2.667558  | -6.147826  | 0.717610  | h  | 4.682255 | -3.268760 | 4.820407  |
| C  | -2.026559 | -0.235430  | 3.388415  | C                   | 3.472675  | -7.705286  | 1.964940  | h  | 9.370664 | -3.270979 | 0.316225  |
| H  | -2.926370 | 0.320045   | 3.158447  | C                   | 4.620329  | -8.118393  | 2.666148  | h  | 7.587009 | -3.447756 | -1.761683 |
| C  | 1.733018  | 0.474854   | 6.338646  | H                   | 5.594001  | -7.718320  | 2.397578  | h  | 2.280225 | -3.883826 | -1.669834 |
| H  | 2.097644  | 1.265900   | 6.985238  | C                   | 4.516773  | -9.038130  | 3.719285  | h  | 0.460018 | -3.801376 | 0.495456  |
| O  | 3.263813  | -2.275708  | 0.192852  | H                   | 5.407951  | -9.341261  | 4.259254  | h  | 0.286377 | -0.664486 | 4.723538  |
| H  | 3.829426  | -1.874568  | 0.916761  | C                   | 3.268132  | -9.564636  | 4.079329  | h  | 1.989852 | 1.406957  | 5.652614  |
| H  | 2.335017  | -2.211356  | 0.483380  | H                   | 3.191273  | -10.296649 | 4.875820  | h  | 7.303959 | 1.927453  | 5.367899  |





|                      |           |           |           |    |           |            |           |                       |           |            |           |
|----------------------|-----------|-----------|-----------|----|-----------|------------|-----------|-----------------------|-----------|------------|-----------|
| C                    | -2.470031 | -3.021861 | 3.043456  | H  | -2.013336 | -7.019280  | -0.830050 | O                     | 5.737422  | 1.502979   | 0.015067  |
| C                    | -2.147450 | -2.984118 | 4.389300  | C  | -3.719346 | -7.697984  | 0.310743  | H                     | 5.018535  | 0.955227   | 0.528412  |
| C                    | -0.926801 | -3.789532 | 4.532211  | H  | -3.127048 | -7.427344  | 1.187962  | H                     | 6.645735  | 1.134982   | 0.150425  |
| C                    | 0.542052  | -5.308626 | 5.838015  | H  | -4.332306 | -6.822996  | 0.060838  | h                     | -1.655848 | -7.171256  | 3.467723  |
| C                    | 0.887850  | -5.967329 | 7.090991  | C  | -4.605216 | -8.885491  | 0.620654  | h                     | 4.740605  | -9.451046  | 2.940961  |
| C                    | 1.738360  | -7.002904 | 6.767047  | C  | -4.320177 | -9.732149  | 1.706603  | h                     | 4.784008  | -8.586273  | 0.344423  |
| C                    | 1.898818  | -6.992776 | 5.318878  | H  | -3.440316 | -9.552019  | 2.316193  | h                     | 2.220207  | -4.768526  | -2.367437 |
| C                    | 2.675465  | -7.884985 | 4.586481  | C  | -5.149477 | -10.814812 | 2.013954  | h                     | -0.179239 | -3.603064  | -2.068707 |
| H                    | 3.126636  | -8.716913 | 5.110947  | H  | -4.916773 | -11.442080 | 2.867899  | h                     | -3.257860 | -2.809477  | 2.303653  |
| C                    | 2.791949  | -6.266500 | 0.025993  | C  | -6.278624 | -11.079087 | 1.231989  | h                     | -2.494155 | -2.549769  | 5.014548  |
| H                    | 3.391518  | -6.475176 | -0.853056 | H  | -6.926733 | -11.913723 | 1.479324  | h                     | 0.535950  | -5.668862  | 7.881695  |
| C                    | -1.245562 | -3.787723 | 0.979112  | C  | -5.745622 | -9.161795  | -0.152542 | h                     | 2.362612  | -7.696724  | 7.331857  |
| H                    | -2.077708 | -3.414491 | 0.404318  | H  | -5.978689 | -8.515457  | -0.989326 | h                     | -3.677087 | -7.172150  | -2.681499 |
| C                    | -0.379994 | -4.269579 | 5.718284  | C  | -6.570337 | -10.252649 | 0.140238  | h                     | -1.146519 | -9.275330  | 0.102462  |
| H                    | -0.788705 | -3.889861 | 6.649424  | H  | -7.442425 | -10.447491 | -0.477760 | h                     | 3.830785  | 4.429699   | -0.157934 |
| O                    | 2.117149  | -1.895754 | 1.219375  | C  | -1.836920 | -9.141117  | -0.730244 | h                     | 0.749792  | 1.304173   | -1.556370 |
| H                    | 2.047716  | -2.169457 | 2.242167  | O  | -1.922494 | -10.044383 | -1.587403 |                       |           |            |           |
| H                    | 1.755258  | -2.608366 | 0.656227  | S  | -0.565345 | -7.356965  | 2.642700  |                       |           |            |           |
| O                    | 3.800385  | 0.134253  | 1.401482  | H  | 1.234096  | -2.633490  | 3.692181  | <b>Conf LW3 -CpdI</b> |           |            |           |
| H                    | 3.259827  | -0.668213 | 1.147925  | O  | 2.513419  | -4.612155  | 2.800556  | C                     | 4.558884  | 4.634359   | -1.014705 |
| H                    | 3.169462  | 0.845233  | 1.662566  | O  | 2.117796  | -2.224010  | 3.690964  | H                     | 4.454202  | 5.655388   | -1.390416 |
| O                    | 5.624859  | 1.418470  | 0.093525  | Fe | 1.166119  | -5.595036  | 2.687349  | H                     | 5.536239  | 4.537332   | -0.530095 |
| H                    | 4.929909  | 0.852981  | 0.563753  | N  | 2.450298  | -7.076291  | 2.234583  | C                     | 4.500312  | 3.657732   | -2.184999 |
| H                    | 6.536829  | 1.055136  | 0.233084  | N  | 0.956735  | -5.195452  | 0.715399  | O                     | 3.941123  | 4.016842   | -3.274315 |
| h                    | -1.620156 | -7.134343 | 3.463841  | N  | -0.339607 | -4.292073  | 3.082705  | O                     | 5.067751  | 2.495685   | -2.022722 |
| h                    | 4.665395  | -9.304232 | 3.002368  | N  | 1.251414  | -6.058400  | 4.626539  | H                     | 6.011240  | 2.324927   | -0.853324 |
| h                    | 4.636419  | -8.466281 | 0.404729  | C  | 3.015518  | -7.979577  | 3.119794  | C                     | 0.792179  | 0.206840   | -0.953286 |
| h                    | 2.072929  | -4.597401 | -2.220915 | C  | 4.059699  | -8.753575  | 2.453141  | H                     | -0.077476 | -0.018523  | -0.322553 |
| h                    | -0.324822 | -3.470654 | -1.918985 | C  | 4.126025  | -8.282572  | 1.158605  | O                     | 1.918196  | 0.118215   | -0.051252 |
| h                    | -3.369797 | -2.690643 | 2.525012  | C  | 3.121373  | -7.232565  | 1.042074  | H                     | 2.757094  | -0.207507  | -0.531265 |
| h                    | -2.610672 | -2.478737 | 5.236697  | C  | 1.893728  | -5.497593  | -0.260624 | C                     | 0.898730  | -0.827740  | -2.080677 |
| h                    | 0.464558  | -5.659845 | 8.047204  | C  | 1.557308  | -4.816006  | -1.503505 | H                     | 1.040582  | -1.818207  | -1.643193 |
| h                    | 2.344978  | -7.619916 | 7.429902  | C  | 0.345581  | -4.172010  | -1.301288 | H                     | -0.007274 | -0.852682  | -2.698115 |
| h                    | -3.676593 | -7.171723 | -2.679623 | C  | -0.007444 | -4.423610  | 0.100882  | H                     | 1.754987  | -0.625243  | -2.735222 |
| h                    | -1.148520 | -9.254181 | 0.125109  | C  | -1.283739 | -3.857166  | 2.164345  | N                     | -3.348469 | -7.971912  | -2.178235 |
| h                    | 3.835779  | 4.433274  | -0.144155 | C  | -2.363773 | -3.139434  | 2.832617  | H                     | -3.334826 | -8.870225  | -2.637953 |
| h                    | 0.751646  | 1.294823  | -1.541428 | C  | -2.028849 | -3.063865  | 4.173560  | C                     | -2.712432 | -7.870531  | -0.879260 |
|                      |           |           |           | C  | -2.028849 | -3.063865  | 4.173560  | H                     | -2.026498 | -7.007027  | -0.820763 |
| <b>Conf LW3 -IC1</b> |           |           |           | C  | -0.796475 | -3.855037  | 4.315960  | C                     | -3.738093 | -7.688361  | 0.312764  |
| C                    | 4.605536  | 4.532659  | -0.917689 | C  | 0.644888  | -5.375724  | 5.667908  | H                     | -3.154055 | -7.410826  | 1.193641  |
| H                    | 4.622322  | 5.575268  | -1.238599 | C  | 0.965359  | -6.008120  | 6.939051  | H                     | -4.353639 | -6.817475  | 0.055362  |
| H                    | 5.550565  | 4.304378  | -0.412693 | C  | 1.789179  | -7.073806  | 6.645407  | C                     | -4.620211 | -8.879878  | 0.618783  |
| C                    | 4.472271  | 3.654050  | -2.144377 | C  | 1.952577  | -7.100741  | 5.197595  | C                     | -4.331561 | -9.732267  | 1.699555  |
| O                    | 3.999658  | 4.095588  | -3.219678 | C  | 2.722881  | -8.017182  | 4.476867  | H                     | -3.452254 | -9.554281  | 2.310181  |
| O                    | 4.900178  | 2.398430  | -2.062139 | H  | 3.184475  | -8.824845  | 5.028618  | C                     | -5.156632 | -10.819462 | 2.001462  |
| H                    | 5.338464  | 2.019303  | -1.115979 | C  | 2.895349  | -6.445922  | -0.091277 | H                     | -4.920656 | -11.450521 | 2.851635  |
| C                    | 0.970162  | 0.291664  | -1.218242 | H  | 3.551956  | -6.628041  | -0.934313 | C                     | -6.285264 | -11.083367 | 1.218774  |
| H                    | 0.218294  | -0.405257 | -1.627107 | C  | -1.140993 | -3.976451  | 0.788473  | H                     | -6.929943 | -11.921705 | 1.462044  |
| O                    | 0.916024  | 0.328933  | 0.222680  | H  | -1.980934 | -3.646683  | 0.195789  | C                     | -5.760004 | -9.156297  | -0.155040 |
| H                    | 1.399212  | -0.471714 | 0.630500  | C  | -0.238228 | -4.312463  | 5.511388  | H                     | -5.996712 | -8.506014  | -0.987636 |
| C                    | 2.330985  | -0.153148 | -1.777469 | H  | -0.615549 | -3.878085  | 6.431814  | C                     | -6.580568 | -10.251868 | 0.131886  |
| H                    | 2.552418  | -1.170871 | -1.442592 | O  | 2.419627  | -1.599976  | 1.133039  | H                     | -7.452267 | -10.446163 | -0.486738 |
| H                    | 2.332790  | -0.159599 | -2.874216 | H  | 2.290521  | -1.972722  | 2.724781  | C                     | -1.846075 | -9.128731  | -0.705715 |
| H                    | 3.146393  | 0.491975  | -1.440192 | H  | 2.223351  | -2.323751  | 0.508511  | O                     | -1.932185 | -10.041732 | -1.553191 |
| N                    | -3.348431 | -7.974076 | -2.182627 | O  | 3.986650  | 0.279063   | 1.327133  | S                     | -0.553754 | -7.286193  | 2.678506  |
| H                    | -3.330087 | -8.868852 | -2.649413 | H  | 3.410366  | -0.584445  | 1.091000  | H                     | 1.916456  | -2.309401  | 2.412375  |
| C                    | -2.702919 | -7.879975 | -0.888468 | H  | 3.346466  | 0.953126   | 1.650694  | O                     | 2.106521  | -4.116327  | 3.118150  |

|                       |           |           |           |    |           |            |           |                         |           |           |           |
|-----------------------|-----------|-----------|-----------|----|-----------|------------|-----------|-------------------------|-----------|-----------|-----------|
| O                     | 2.392189  | -1.497143 | 2.143212  | H  | 5.566695  | 4.265090   | -0.361935 | C                       | 1.747563  | -7.004355 | 6.790654  |
| Fe                    | 1.020751  | -5.356194 | 2.854255  | C  | 4.484182  | 3.613699   | -2.090762 | C                       | 1.922056  | -6.968835 | 5.343722  |
| N                     | 2.432396  | -6.728096 | 2.422350  | O  | 4.036127  | 4.043206   | -3.177270 | C                       | 2.703595  | -7.852927 | 4.603886  |
| N                     | 0.792992  | -5.005081 | 0.882310  | O  | 4.868099  | 2.337136   | -1.986305 | H                       | 3.146123  | -8.693834 | 5.121770  |
| N                     | -0.577365 | -4.205564 | 3.223951  | H  | 5.269984  | 1.961422   | -1.065206 | C                       | 2.848099  | -6.219098 | 0.049591  |
| N                     | 1.101826  | -5.868648 | 4.775606  | C  | 0.956472  | 0.258753   | -1.200548 | H                       | 3.443117  | -6.436464 | -0.830384 |
| C                     | 2.964412  | -7.683541 | 3.273747  | H  | 0.212639  | -0.429098  | -1.627484 | C                       | -1.170073 | -3.705969 | 1.020054  |
| C                     | 4.014738  | -8.441378 | 2.600208  | O  | 0.841934  | 0.306371   | 0.250006  | H                       | -1.997756 | -3.319337 | 0.448602  |
| C                     | 4.122105  | -7.908700 | 1.331344  | H  | 1.023615  | -0.589962  | 0.632691  | C                       | -0.379896 | -4.269151 | 5.764012  |
| C                     | 3.122636  | -6.851186 | 1.236518  | C  | 2.336049  | -0.226376  | -1.652981 | H                       | -0.808428 | -3.916819 | 6.697441  |
| C                     | 1.743511  | -5.259765 | -0.084153 | H  | 2.491140  | -1.248375  | -1.284116 | O                       | 7.613523  | -0.089249 | 0.896973  |
| C                     | 1.301955  | -4.750258 | -1.373579 | H  | 2.415656  | -0.262764  | -2.745395 | H                       | 7.137771  | -0.599924 | 1.618886  |
| C                     | 0.006980  | -4.279639 | -1.208410 | H  | 3.145470  | 0.407938   | -1.281365 | H                       | 8.299943  | -0.613300 | 0.436099  |
| C                     | -0.280867 | -4.414618 | 0.228599  | N  | -3.345317 | -7.969243  | -2.174759 | O                       | 5.906939  | -1.130664 | 2.640264  |
| C                     | -1.520149 | -3.793713 | 2.306279  | H  | -3.329789 | -8.870128  | -2.629410 | H                       | 5.511187  | -2.028853 | 2.402989  |
| C                     | -2.576435 | -3.032114 | 2.966845  | C  | -2.697374 | -7.859206  | -0.880088 | H                       | 5.163605  | -0.501790 | 2.483802  |
| C                     | -2.214815 | -2.911646 | 4.298789  | H  | -2.007627 | -6.998432  | -0.832416 | O                       | 4.452638  | -3.153185 | 1.659781  |
| C                     | -0.996083 | -3.721352 | 4.452854  | C  | -3.712564 | -7.664851  | 0.319083  | H                       | 3.970643  | -2.742281 | 0.917073  |
| C                     | 0.467413  | -5.216205 | 5.816944  | H  | -3.117980 | -7.389966  | 1.193455  | H                       | 3.748650  | -3.612101 | 2.252899  |
| C                     | 0.789661  | -5.860902 | 7.081263  | H  | -4.323295 | -6.789675  | 0.065700  | O                       | 5.665178  | 1.350624  | 0.115837  |
| C                     | 1.633141  | -6.910740 | 6.778193  | C  | -4.598960 | -8.850995  | 0.633018  | H                       | 4.933673  | 0.880109  | 0.583696  |
| C                     | 1.815612  | -6.908392 | 5.336820  | C  | -4.316327 | -9.694253  | 1.722292  | H                       | 6.550094  | 0.866907  | 0.300007  |
| C                     | 2.617877  | -7.793833 | 4.611866  | H  | -3.442695 | -9.507041  | 2.338529  | h                       | -1.598279 | -7.103877 | 3.470161  |
| H                     | 3.054726  | -8.632741 | 5.137567  | C  | -5.139989 | -10.782747 | 2.024823  | h                       | 4.688083  | -9.281043 | 3.025329  |
| C                     | 2.852505  | -6.081908 | 0.105626  | H  | -4.907699 | -11.408619 | 2.879870  | h                       | 4.688065  | -8.425195 | 0.432731  |
| H                     | 3.521126  | -6.213090 | -0.737909 | C  | -6.262593 | -11.054979 | 1.236149  | h                       | 2.090472  | -4.597842 | -2.218301 |
| C                     | -1.406906 | -3.980616 | 0.926656  | H  | -6.906311 | -11.894374 | 1.479181  | h                       | -0.305092 | -3.478220 | -1.907240 |
| H                     | -2.276173 | -3.704240 | 0.354416  | C  | -5.733731 | -9.134805  | -0.145900 | h                       | -3.318205 | -2.627901 | 2.557694  |
| C                     | -0.434963 | -4.164521 | 5.651152  | H  | -5.964471 | -8.491583  | -0.985636 | h                       | -2.599951 | -2.460272 | 5.282379  |
| H                     | -0.824975 | -3.737977 | 6.570435  | C  | -6.553885 | -10.230078 | 0.143173  | h                       | 0.453606  | -5.690086 | 8.079964  |
| O                     | 4.202659  | -0.646705 | -0.974601 | H  | -7.421649 | -10.430411 | -0.479335 | h                       | 2.360241  | -7.620429 | 7.448791  |
| H                     | 1.971763  | -0.991235 | 1.406562  | C  | -1.839267 | -9.122435  | -0.700736 | h                       | -3.675990 | -7.171515 | -2.678999 |
| H                     | 4.416119  | -0.305786 | -1.872447 | O  | -1.939267 | -10.041494 | -1.541565 | h                       | -1.145600 | -9.247754 | 0.130641  |
| O                     | 4.702442  | 0.745062  | 1.095903  | S  | -0.500241 | -7.234018  | 2.644496  | h                       | 3.845078  | 4.422790  | -0.123823 |
| H                     | 4.574345  | -0.062554 | -0.218290 | H  | 1.190051  | -3.150516  | 3.933972  | h                       | 0.755926  | 1.277120  | -1.533377 |
| H                     | 3.816454  | 1.028183  | 1.397855  | O  | 2.595609  | -4.258275  | 3.108802  | <b>Conf LW3 -TShooh</b> |           |           |           |
| O                     | 6.423964  | 2.197683  | 0.081599  | O  | 2.157616  | -2.955565  | 3.821309  | C                       | 4.605491  | 4.511392  | -0.926058 |
| H                     | 5.356517  | 1.500608  | 0.792227  | Fe | 1.043142  | -5.493355  | 2.870026  | H                       | 4.622719  | 5.542103  | -1.286451 |
| H                     | 7.235675  | 1.635598  | 0.118206  | N  | 2.473184  | -6.818033  | 2.395402  | H                       | 5.554629  | 4.304337  | -0.416524 |
| h                     | -1.668940 | -7.163340 | 3.482005  | N  | 0.941202  | -4.929982  | 0.919225  | C                       | 4.473167  | 3.560370  | -2.112809 |
| h                     | 4.676893  | -9.165682 | 3.074550  | N  | -0.401743 | -4.117601  | 3.326428  | O                       | 4.036505  | 4.013553  | -3.220575 |
| h                     | 4.795467  | -8.184267 | 0.519733  | N  | 1.198653  | -5.911408  | 4.814547  | O                       | 4.831059  | 2.319929  | -1.936095 |
| h                     | 1.980011  | -4.697892 | -2.225380 | C  | 3.006669  | -7.765330  | 3.251452  | H                       | 5.512149  | 1.760040  | -0.699416 |
| h                     | -0.598824 | -3.907068 | -2.034399 | C  | 4.010810  | -8.568986  | 2.553796  | C                       | 0.989470  | 0.310695  | -1.367003 |
| h                     | -3.478122 | -2.707927 | 2.447298  | C  | 4.064669  | -8.090375  | 1.261790  | H                       | 0.262259  | -0.374704 | -1.826431 |
| h                     | -2.649739 | -2.351165 | 5.126296  | C  | 3.099179  | -6.996882  | 1.174964  | O                       | 0.881525  | 0.254815  | 0.090488  |
| h                     | 0.360933  | -5.544902 | 8.032264  | C  | 1.845569  | -5.261328  | -0.082179 | H                       | 1.133165  | -0.660281 | 0.372918  |
| h                     | 2.208772  | -7.546711 | 7.450693  | C  | 1.464295  | -4.611031  | -1.326228 | C                       | 2.377799  | -0.080214 | -1.869583 |
| h                     | -3.676988 | -7.171841 | -2.680165 | C  | 0.248176  | -3.974826  | -1.110156 | H                       | 2.606497  | -1.105366 | -1.552185 |
| h                     | -1.156427 | -9.253552 | 0.129073  | C  | -0.064203 | -4.178086  | 0.311518  | H                       | 2.412734  | -0.073299 | -2.964819 |
| h                     | 3.824014  | 4.493693  | -0.222086 | C  | -1.324655 | -3.641246  | 2.400301  | H                       | 3.167725  | 0.589972  | -1.518266 |
| h                     | 0.703213  | 1.209323  | -1.371831 | C  | -2.420620 | -2.958886  | 3.080051  | N                       | -3.346299 | -7.970825 | -2.176035 |
|                       |           |           |           | C  | -2.124269 | -2.951052  | 4.433305  | H                       | -3.333779 | -8.870645 | -2.632866 |
| <b>Conf LW3 -RC1-</b> |           |           |           | C  | -0.909530 | -3.760615  | 4.580705  | C                       | -2.699839 | -7.865436 | -0.881596 |
| C                     | 4.629092  | 4.503001  | -0.876787 | C  | 0.548607  | -5.305182  | 5.874529  | H                       | -2.012062 | -7.003083 | -0.830327 |
| H                     | 4.666867  | 5.540726  | -1.210294 | C  | 0.886301  | -5.980297  | 7.122562  | C                       | -3.716868 | -7.678238 | 0.317674  |

|    |           |            |           |                       |           |            |           |    |           |           |           |
|----|-----------|------------|-----------|-----------------------|-----------|------------|-----------|----|-----------|-----------|-----------|
| H  | -3.125606 | -7.404093  | 1.194998  | H                     | 3.509967  | -3.641653  | 2.529927  | O  | 2.550524  | -3.861851 | 3.230369  |
| H  | -4.328359 | -6.803140  | 0.065971  | O                     | 5.790860  | 1.291468   | 0.177768  | O  | 1.775245  | -2.553742 | 3.110152  |
| C  | -4.602687 | -8.865468  | 0.630268  | H                     | 4.987015  | 0.898260   | 0.589470  | Fe | 0.976124  | -5.506419 | 2.855066  |
| C  | -4.323885 | -9.706158  | 1.722376  | H                     | 6.969136  | 0.458212   | 0.596149  | N  | 2.484683  | -6.753689 | 2.419840  |
| H  | -3.451859 | -9.518930  | 2.341006  | h                     | -1.587789 | -7.117763  | 3.472907  | N  | 0.913208  | -4.939631 | 0.916027  |
| C  | -5.150275 | -10.791948 | 2.026964  | h                     | 4.696878  | -9.262122  | 3.074860  | N  | -0.442199 | -4.106961 | 3.279818  |
| H  | -4.922110 | -11.415309 | 2.884898  | h                     | 4.708536  | -8.416923  | 0.480399  | N  | 1.188599  | -5.853045 | 4.792753  |
| C  | -6.271934 | -11.064027 | 1.237090  | h                     | 2.107847  | -4.635717  | -2.219593 | C  | 3.015861  | -7.707117 | 3.274975  |
| H  | -6.917973 | -11.900773 | 1.482515  | h                     | -0.274980 | -3.477335  | -1.902076 | C  | 4.014275  | -8.517005 | 2.581519  |
| C  | -5.736392 | -9.149344  | -0.150195 | h                     | -3.372839 | -2.706577  | 2.489174  | C  | 4.069002  | -8.044996 | 1.286899  |
| H  | -5.965518 | -8.508212  | -0.991979 | h                     | -2.658086 | -2.471215  | 5.212217  | C  | 3.108756  | -6.951659 | 1.195612  |
| C  | -6.559213 | -10.242059 | 0.140768  | h                     | 0.425192  | -5.628149  | 8.071338  | C  | 1.838345  | -5.250307 | -0.078548 |
| H  | -7.426411 | -10.442584 | -0.482155 | h                     | 2.308003  | -7.581905  | 7.470673  | C  | 1.472570  | -4.590357 | -1.321187 |
| C  | -1.838827 | -9.127354  | -0.706483 | h                     | -3.676180 | -7.172110  | -2.679229 | C  | 0.249953  | -3.959937 | -1.111411 |
| O  | -1.940448 | -10.047375 | -1.544700 | h                     | -1.140595 | -9.251028  | 0.121312  | C  | -0.091512 | -4.197235 | 0.295961  |
| S  | -0.484655 | -7.258708  | 2.655855  | h                     | 3.834546  | 4.434724   | -0.159356 | C  | -1.403767 | -3.689350 | 2.347839  |
| H  | 0.937435  | -2.987769  | 3.426175  | h                     | 0.752913  | 1.340480   | -1.634680 | C  | -2.504436 | -3.023196 | 3.022057  |
| O  | 2.575244  | -4.005387  | 3.225188  |                       |           |            |           | C  | -2.190508 | -2.967648 | 4.373566  |
| O  | 1.874936  | -2.641721  | 3.301138  |                       |           |            |           | C  | -0.956289 | -3.736621 | 4.534708  |
| Fe | 1.007977  | -5.510114  | 2.868913  | <b>Conf LW3 –FeRS</b> |           |            |           | C  | 0.530802  | -5.233889 | 5.846621  |
| N  | 2.499503  | -6.781144  | 2.432289  | C                     | 4.605453  | 4.509045   | -0.926026 | C  | 0.857635  | -5.898554 | 7.100616  |
| N  | 0.938006  | -4.964377  | 0.918772  | H                     | 4.627371  | 5.543863   | -1.274479 | C  | 1.714219  | -6.931607 | 6.785583  |
| N  | -0.427276 | -4.126385  | 3.293918  | H                     | 5.553013  | 4.290845   | -0.418542 | C  | 1.904831  | -6.910715 | 5.343967  |
| N  | 1.188187  | -5.880391  | 4.809276  | C                     | 4.469770  | 3.571545   | -2.123906 | C  | 2.700052  | -7.795519 | 4.623217  |
| C  | 3.025223  | -7.733249  | 3.291153  | O                     | 4.016021  | 4.034141   | -3.221821 | H  | 3.139990  | -8.633093 | 5.147869  |
| C  | 4.026819  | -8.543997  | 2.602226  | O                     | 4.843485  | 2.334450   | -1.965411 | C  | 2.853823  | -6.190527 | 0.063155  |
| C  | 4.084881  | -8.075722  | 1.306658  | H                     | 5.600652  | 1.783985   | -0.740962 | H  | 3.459100  | -6.405359 | -0.809596 |
| C  | 3.125413  | -6.981542  | 1.210753  | C                     | 1.003975  | 0.318582   | -1.413581 | C  | -1.233528 | -3.766176 | 0.974130  |
| C  | 1.854622  | -5.290097  | -0.078280 | H                     | 0.258862  | -0.364592  | -1.846475 | H  | -2.066557 | -3.426010 | 0.379389  |
| C  | 1.479761  | -4.650201  | -1.328883 | O                     | 0.967022  | 0.236430   | 0.046520  | C  | -0.406909 | -4.208924 | 5.720995  |
| C  | 0.263062  | -4.009494  | -1.117611 | H                     | 1.272978  | -0.671102  | 0.295389  | H  | -0.834919 | -3.844779 | 6.649737  |
| C  | -0.068800 | -4.225674  | 0.297307  | C                     | 2.367960  | -0.052349  | -1.990341 | O  | 7.694460  | -0.190767 | 1.052993  |
| C  | -1.372120 | -3.696585  | 2.355447  | H                     | 2.621583  | -1.083039  | -1.713802 | H  | 6.748234  | -0.803838 | 2.013606  |
| C  | -2.476793 | -3.024506  | 3.022174  | H                     | 2.349792  | -0.015682  | -3.085999 | H  | 8.347095  | -0.675114 | 0.508997  |
| C  | -2.176759 | -2.978842  | 4.376331  | H                     | 3.170133  | 0.614051   | -1.659192 | O  | 5.952599  | -1.062081 | 2.645088  |
| C  | -0.949821 | -3.760288  | 4.544481  | N                     | -3.347515 | -7.970821  | -2.175660 | H  | 5.159042  | -2.338000 | 2.222960  |
| C  | 0.527113  | -5.264179  | 5.860810  | H                     | -3.338060 | -8.871363  | -2.631144 | H  | 5.213667  | -0.432860 | 2.467042  |
| C  | 0.856092  | -5.927395  | 7.115910  | C                     | -2.701599 | -7.865415  | -0.881487 | O  | 4.509590  | -3.032294 | 1.806795  |
| C  | 1.717615  | -6.956169  | 6.801373  | H                     | -2.013222 | -7.003368  | -0.830480 | H  | 3.977186  | -2.603320 | 1.099850  |
| C  | 1.907235  | -6.935114  | 5.358653  | C                     | -3.718038 | -7.676526  | 0.318589  | H  | 3.390397  | -3.609728 | 2.653191  |
| C  | 2.703958  | -7.820038  | 4.638515  | H                     | -3.126511 | -7.401911  | 1.195838  | O  | 5.911761  | 1.330018  | 0.125925  |
| H  | 3.140968  | -8.658566  | 5.164065  | H                     | -4.329219 | -6.801310  | 0.066432  | H  | 5.123917  | 0.923576  | 0.555567  |
| C  | 2.871279  | -6.227551  | 0.073056  | C                     | -4.603749 | -8.863427  | 0.632393  | H  | 7.140952  | 0.510962  | 0.543805  |
| H  | 3.478740  | -6.450852  | -0.795526 | C                     | -4.325634 | -9.701772  | 1.726415  | h  | -1.592051 | -7.114256 | 3.478746  |
| C  | -1.202460 | -3.780196  | 0.981034  | H                     | -3.454781 | -9.512164  | 2.346195  | h  | 4.685688  | -9.234635 | 3.052984  |
| H  | -2.035806 | -3.439523  | 0.386825  | C                     | -5.150813 | -10.788364 | 2.031504  | h  | 4.694024  | -8.379980 | 0.459131  |
| C  | -0.411806 | -4.240077  | 5.733840  | H                     | -4.922940 | -11.409904 | 2.890864  | h  | 2.100892  | -4.569637 | -2.211607 |
| H  | -0.845995 | -3.879326  | 6.661123  | C                     | -6.270664 | -11.063404 | 1.239999  | h  | -0.285704 | -3.425152 | -1.895721 |
| O  | 7.513731  | -0.268744  | 1.098214  | H                     | -6.915984 | -11.900854 | 1.485001  | h  | -3.405994 | -2.712944 | 2.493850  |
| H  | 6.587272  | -0.927053  | 1.974440  | C                     | -5.735850 | -9.149962  | -0.149377 | h  | -2.669432 | -2.460597 | 5.211180  |
| H  | 8.229144  | -0.689183  | 0.583424  | H                     | -5.964294 | -8.510242  | -0.992356 | h  | 0.422906  | -5.603834 | 8.055716  |
| O  | 5.768024  | -1.226369  | 2.584004  | C                     | -6.557404 | -10.243532 | 0.142030  | h  | 2.291376  | -7.568100 | 7.456278  |
| H  | 5.052664  | -2.366962  | 2.195515  | H                     | -7.423089 | -10.446135 | -0.482347 | h  | -3.676556 | -7.171983 | -2.679209 |
| H  | 5.056000  | -0.548308  | 2.489906  | C                     | -1.842146 | -9.128173  | -0.706527 | h  | -1.141719 | -9.251258 | 0.119499  |
| O  | 4.366302  | -3.110509  | 1.777661  | O                     | -1.947474 | -10.049793 | -1.542158 | h  | 3.833378  | 4.427742  | -0.160940 |
| H  | 3.828854  | -2.709840  | 1.057456  | S                     | -0.493068 | -7.262125  | 2.657334  | h  | 0.753641  | 1.350765  | -1.658522 |
|    |           |            |           | H                     | 0.850492  | -2.956257  | 3.224298  |    |           |           |           |



**Conf LM1-RC-**

C 2.367306 4.354233 -7.347954  
H 2.290212 5.439831 -7.460219  
H 3.436957 4.126644 -7.419326  
C 1.715677 3.721246 -8.562044  
O 1.847520 4.251947 -9.687868  
O 1.039538 2.554762 -8.491683  
H 0.903898 2.025253 -7.612888  
C -0.507047 1.573202 -1.947125  
H -1.164735 0.757962 -1.613303  
O -0.415894 2.610710 -0.928292  
H -0.340647 2.202478 -0.039803  
C 0.876785 1.007330 -2.287602  
H 1.281355 0.477002 -1.420380  
H 0.828309 0.302163 -3.125511  
H 1.577966 1.809375 -2.542031  
N -3.972986 -5.119365 4.199493  
H -4.706179 -5.196096 4.895862  
C -2.678487 -4.522005 4.593758  
H -2.079009 -4.299149 3.697357  
C -2.869695 -3.184760 5.356353  
H -3.359811 -3.418999 6.312346  
H -1.869066 -2.835231 5.624085  
N -3.113885 -0.774147 4.654575  
H -2.132281 -0.541288 4.855512  
C -3.618334 -2.072934 4.678226  
C -4.077549 0.058508 4.152118  
H -3.929633 1.116252 4.014340  
N -5.191188 -0.620276 3.855185  
C -4.898099 -1.951658 4.166173  
H -5.600515 -2.726028 3.944400  
C -1.823251 -5.481199 5.487343  
O -1.094253 -5.006179 6.380058  
S 0.103354 -0.659304 5.204287  
H 1.982593 0.838568 0.878266  
O 2.904722 -0.598067 1.860940  
O 2.525054 0.089945 0.535859  
Fe 1.592474 -0.469126 3.276188  
N 1.904733 -2.416855 3.605125  
N -0.039986 -0.859789 2.092189  
N 1.274636 1.525296 2.949957  
N 3.156206 -0.049128 4.443421  
C 2.711270 -2.992796 4.580650  
C 2.546631 -4.445836 4.564417  
C 1.663281 -4.733929 3.550270  
C 1.224211 -3.455343 2.995879  
C -0.469529 -2.123076 1.732357  
C -1.752922 -2.038060 1.036186  
C -2.118877 -0.701536 0.992559  
C -1.031970 0.024481 1.673328  
C 0.107600 2.099380 2.468308  
C 0.202190 3.550185 2.506448  
C 1.448452 3.868921 3.033771  
C 2.106987 2.587042 3.323995  
C 3.791135 1.180962 4.516135  
C 4.928948 1.096842 5.430431

C 4.926857 -0.184140 5.948887  
C 3.842737 -0.905415 5.292104  
C 3.586815 -2.273557 5.386923  
H 4.172649 -2.836890 6.105377  
C 0.170995 -3.307244 2.095776  
H -0.267595 -4.229973 1.732847  
C -0.971723 1.389840 1.937277  
H -1.853138 1.981157 1.741854  
C 3.341106 2.367646 3.932234  
H 4.025645 3.199302 4.012795  
O 0.480025 -1.123402 -5.193564  
H 0.831071 -1.597443 -4.386772  
H -0.464289 -1.390634 -5.319166  
O 0.297860 1.021514 -6.614526  
H -0.638803 1.264688 -6.435902  
H 0.593006 0.290749 -5.977392  
O 3.679835 -3.191080 1.030318  
H 4.618707 -2.926353 0.856222  
H 3.300803 -2.506997 1.641071  
O 2.159819 -2.227934 -0.853136  
H 2.664223 -2.815118 -0.203579  
H 2.014975 -1.360410 -0.398290  
O 0.974912 -2.674040 -3.057734  
H 1.410946 -2.517909 -2.137561  
H 1.015374 -3.615868 -3.299020  
h 0.334793 0.417371 6.035884  
h 2.989623 -5.129489 5.288601  
h 1.310501 -5.698927 3.186413  
h -2.326366 -2.902260 0.700947  
h -3.050759 -0.349893 0.549829  
h -0.602077 4.206726 2.174520  
h 1.773621 4.898472 3.183292  
h 5.608514 1.924227 5.634613  
h 5.547644 -0.584085 6.750594  
h -4.096408 -5.585726 3.323567  
h -1.922924 -6.555216 5.330434  
h 2.050448 4.079457 -6.341890  
h -0.941508 2.031768 -2.835397

**Conf LM1 -TSoo**

C 2.369784 4.354307 -7.352235  
H 2.297346 5.440159 -7.465366  
H 3.438457 4.122301 -7.422284  
C 1.716857 3.721803 -8.566172  
O 1.850130 4.253502 -9.692074  
O 1.041929 2.555861 -8.496238  
H 0.904621 2.020696 -7.617113  
C -0.504867 1.559529 -2.009013  
H -1.157546 0.744410 -1.665298  
O -0.393381 2.591033 -0.982778  
H -0.046312 2.196761 -0.157315  
C 0.863908 0.994905 -2.397426  
H 1.313473 0.476298 -1.545321  
H 0.779726 0.279713 -3.223729  
H 1.556398 1.792328 -2.689609  
N -3.970066 -5.119239 4.199186

H -4.700387 -5.195511 4.898831  
C -2.673888 -4.522457 4.587579  
H -2.076262 -4.303349 3.688983  
C -2.862133 -3.181950 5.346101  
H -3.354253 -3.412129 6.301841  
H -1.860857 -2.834530 5.614538  
N -3.096061 -0.776511 4.614279  
H -2.117181 -0.542507 4.809620  
C -3.607824 -2.072282 4.661998  
C -4.060561 0.055650 4.109914  
H -3.907543 1.109946 3.952876  
N -5.180068 -0.621210 3.834931  
C -4.891969 -1.949649 4.162391  
H -5.601115 -2.722757 3.958239  
C -1.815708 -5.478724 5.481715  
O -1.080945 -4.999165 6.367373  
S 0.147146 -0.657625 5.187374  
H 2.406013 0.723971 0.501928  
O 2.822904 -0.687114 1.983607  
O 2.971324 0.245812 -0.140591  
Fe 1.657100 -0.493669 3.209548  
N 1.866345 -2.444473 3.627367  
N -0.009587 -0.886875 2.088476  
N 1.314576 1.501118 2.977616  
N 3.156389 -0.057297 4.469548  
C 2.685218 -3.012296 4.594105  
C 2.535745 -4.468293 4.565974  
C 1.664322 -4.760009 3.544040  
C 1.216293 -3.484265 2.993752  
C -0.448465 -2.145323 1.722584  
C -1.722310 -2.045263 1.016632  
C -2.074200 -0.705055 0.969356  
C -0.983211 0.011414 1.651153  
C 0.175838 2.073360 2.438696  
C 0.280901 3.525100 2.454795  
C 1.508111 3.841865 3.021240  
C 2.148225 2.561595 3.345555  
C 3.815986 1.160558 4.539326  
C 4.950865 1.054884 5.448954  
C 4.930312 -0.227641 5.960779  
C 3.833018 -0.931188 5.306500  
C 3.565937 -2.296694 5.395762  
H 4.157428 -2.865651 6.104396  
C 0.178155 -3.336389 2.081094  
H -0.253966 -4.255152 1.701955  
C -0.898500 1.375492 1.889097  
H -1.742731 1.989008 1.624523  
C 3.381160 2.348270 3.954293  
H 4.070806 3.177706 4.022658  
O 0.522443 -1.137121 -5.259064  
H 0.924507 -1.605489 -4.466694  
H -0.422796 -1.416609 -5.339393  
O 0.308036 1.024444 -6.625867  
H -0.626547 1.267854 -6.439975  
H 0.603997 0.273296 -6.006343  
O 3.751561 -3.106082 1.008611

H 4.705471 -2.867373 0.891578  
H 3.336358 -2.378560 1.550500  
O 2.614397 -2.135899 -1.154369  
H 2.939625 -2.728184 -0.409836  
H 2.586998 -1.198798 -0.777928  
O 1.188927 -2.643858 -3.167139  
H 1.742407 -2.441324 -2.307867  
H 1.310610 -3.572683 -3.431528  
h 0.356335 0.416327 6.028334  
h 2.979183 -5.151766 5.290055  
h 1.318946 -5.725185 3.173612  
h -2.298364 -2.905087 0.674681  
h -3.004619 -0.351793 0.524843  
h -0.513938 4.177894 2.094020  
h 1.839365 4.867677 3.182628  
h 5.638088 1.875057 5.656573  
h 5.546548 -0.633841 6.762852  
h -4.095606 -5.585640 3.323582  
h -1.918642 -6.553126 5.329625  
h 2.051214 4.081369 -6.346211  
h -0.954281 2.034470 -2.881094

**Conf LM1 -Cpdl**

C 2.361248 4.424903 -7.467343  
H 2.263144 5.511650 -7.570160  
H 3.434873 4.219586 -7.560802  
C 1.689043 3.766370 -8.682049  
O 1.920594 4.310562 -9.817660  
O 0.970713 2.686509 -8.559156  
H 0.685713 1.768557 -7.343390  
C -0.436506 1.727091 -1.921996  
H -1.116324 1.019846 -1.440744  
O -0.268090 2.812782 -0.950574  
H 0.489354 3.381121 -1.220852  
C 0.894084 1.033068 -2.230641  
H 1.321690 0.615600 -1.314260  
H 0.763007 0.222130 -2.957189  
H 1.633785 1.727338 -2.651241  
N -3.974773 -5.117216 4.198663  
H -4.707294 -5.193054 4.896463  
C -2.684410 -4.515088 4.589069  
H -2.093019 -4.281092 3.689645  
C -2.882375 -3.184184 5.361727  
H -3.375596 -3.427295 6.313547  
H -1.883714 -2.834586 5.637420  
N -3.143628 -0.764472 4.699456  
H -2.176371 -0.520531 4.930488  
C -3.631407 -2.071144 4.686621  
C -4.105176 0.065603 4.185895  
H -3.970846 1.128251 4.074400  
N -5.198875 -0.623094 3.847522  
C -4.898237 -1.956445 4.142696  
H -5.588886 -2.733758 3.895797  
C -1.807886 -5.469379 5.469528  
O -1.043718 -4.980153 6.324321  
S 0.098702 -0.610797 5.221651

H 3.357231 0.058024 0.179023  
O 2.616900 -0.415403 1.869240  
O 3.913072 -0.168357 -0.592616  
Fe 1.588486 -0.383197 3.189633  
N 1.829541 -2.345376 3.580306  
N -0.107007 -0.783545 2.119840  
N 1.197307 1.609975 3.046329  
N 3.102796 0.034595 4.440044  
C 2.654412 -2.928177 4.531519  
C 2.504364 -4.382770 4.505714  
C 1.621747 -4.668334 3.489392  
C 1.172954 -3.387503 2.955009  
C -0.538770 -2.031409 1.735833  
C -1.810943 -1.938963 1.026581  
C -2.166265 -0.599962 0.982157  
C -1.077855 0.116870 1.668866  
C 0.091932 2.180925 2.472341  
C 0.204803 3.633759 2.455552  
C 1.431011 3.953492 3.017016  
C 2.053232 2.672783 3.375686  
C 3.750252 1.251674 4.528978  
C 4.889528 1.153868 5.428537  
C 4.885255 -0.137637 5.929022  
C 3.797742 -0.839930 5.266883  
C 3.539519 -2.210365 5.332765  
H 4.134336 -2.783722 6.035702  
C 0.112024 -3.225190 2.068586  
H -0.318063 -4.138981 1.673821  
C -0.980502 1.476495 1.905759  
H -1.803283 2.099785 1.604738  
C 3.293717 2.445682 3.950419  
H 3.993039 3.268923 3.998282  
O 0.457451 -1.062085 -5.295443  
H 0.974223 -1.943256 -4.216392  
H -0.494633 -1.296025 -5.408476  
O 0.284012 1.063751 -6.701642  
H -0.652432 1.305786 -6.526376  
H 0.634754 -0.192314 -5.795194  
O 3.541284 -3.018742 0.790371  
H 4.477366 -2.706979 0.673553  
H 3.066786 -2.284310 1.247834  
O 3.010356 -2.306658 -1.761566  
H 3.029878 -2.810512 -0.908395  
H 3.462860 -0.868487 -1.155653  
O 1.066940 -2.654996 -3.463419  
H 2.200102 -2.429209 -2.339874  
H 1.251925 -3.533728 -3.839105  
h 0.313022 0.453447 6.073589  
h 2.951875 -5.069913 5.223791  
h 1.271731 -5.630726 3.116087  
h -2.367168 -2.805737 0.669673  
h -3.094234 -0.249330 0.530497  
h -0.583686 4.281791 2.072923  
h 1.778464 4.977731 3.152216  
h 5.580424 1.972476 5.630057  
h 5.510301 -0.548734 6.721728

h -4.096885 -5.585127 3.323380  
h -1.922994 -6.544442 5.331478  
h 2.065783 4.134485 -6.459164  
h -0.885142 2.105097 -2.840639

**Conf LM2-RC-**

C 0.133878 -2.917021 -6.268890  
H -0.188966 -2.544498 -7.242304  
H 1.221791 -3.065621 -6.301571  
C -0.524497 -4.259214 -6.057962  
O -1.259116 -4.772152 -6.944599  
O -0.252321 -4.980303 -4.975734  
H 0.271260 -4.570236 -4.129082  
C -0.951236 -1.335713 -0.195317  
H -1.295240 -1.575486 0.818322  
O -0.973041 0.101492 -0.415120  
H -0.149923 0.497630 -0.040675  
C 0.469524 -1.892296 -0.381330  
H 1.143170 -1.439228 0.354917  
H 0.512819 -2.978644 -0.228717  
H 0.865879 -1.663240 -1.376493  
N 1.039653 -2.475795 8.887533  
H 0.781545 -2.747104 9.823654  
C 2.048832 -1.452507 8.783291  
H 2.620595 -1.538821 7.854275  
C 1.477828 0.048533 8.843578  
H 1.560681 0.398857 9.877199  
H 2.134596 0.686477 8.238956  
N -0.349973 0.656417 7.171698  
H 0.234281 1.059470 6.446646  
C 0.055742 0.220836 8.430774  
C -1.717606 0.672100 7.143229  
H -2.274522 0.981753 6.277025  
N -2.218530 0.265024 8.313477  
C -1.117157 -0.007463 9.125229  
H -1.241167 -0.338718 10.142997  
C 2.994142 -1.661886 9.996075  
O 2.538515 -2.282550 10.979791  
S 0.734353 3.182597 5.152178  
H 0.970211 2.384158 0.261609  
O 2.415153 1.742838 1.418359  
O 1.500617 1.550763 0.191362  
FE 1.576202 2.518219 2.984286  
N 2.904681 1.414480 4.026766  
N 0.204236 1.020810 3.067210  
N 0.260475 3.628803 1.881120  
N 2.904644 4.037874 2.936539  
C 4.069970 1.856367 4.621478  
C 4.689764 0.763995 5.368591  
C 3.909966 -0.360016 5.165524  
C 2.767122 0.076952 4.365745  
C 0.437871 -0.251945 3.555093  
C -0.791616 -1.037289 3.513149  
C -1.795246 -0.206778 3.039564  
C -1.136420 1.069010 2.713415  
C -1.075320 3.323357 1.639445





|    |           |           |           |                          |           |           |           |    |           |           |           |
|----|-----------|-----------|-----------|--------------------------|-----------|-----------|-----------|----|-----------|-----------|-----------|
| H  | 0.419558  | -6.090520 | -2.632950 | H                        | -1.839158 | 3.143598  | 0.064524  | H  | -0.797414 | 3.443583  | 4.173376  |
| C  | -1.871312 | -1.238696 | -0.586499 | C                        | 3.641550  | 3.770298  | -1.164223 | N  | -1.638012 | 3.527183  | 6.158670  |
| H  | -2.423015 | -0.964248 | 0.321816  | H                        | 4.109159  | 4.199711  | -2.044910 | C  | -1.072998 | 3.160592  | 7.382290  |
| O  | -1.332514 | -0.045093 | -1.222000 | O                        | 0.237675  | -5.206910 | -1.432503 | H  | -1.595950 | 3.297301  | 8.313189  |
| H  | -0.396663 | 0.083864  | -0.933783 | H                        | 0.713320  | -4.351580 | -1.780808 | C  | 2.122800  | 0.146161  | 9.398694  |
| C  | -0.751242 | -2.211927 | -0.204565 | H                        | 0.755009  | -5.457865 | -0.618031 | O  | 1.611654  | 0.150387  | 10.539617 |
| H  | -0.124846 | -1.756010 | 0.568655  | O                        | 3.654835  | -2.461043 | -0.938671 | S  | 1.969899  | 3.994282  | 3.126660  |
| H  | -1.136670 | -3.163254 | 0.182449  | H                        | 3.225963  | -2.507175 | -0.030926 | H  | 1.580636  | 1.435933  | -0.836630 |
| H  | -0.110714 | -2.417247 | -1.066035 | H                        | 4.155158  | -1.609586 | -0.948978 | O  | 2.683042  | 0.564270  | 0.480628  |
| N  | -0.094767 | -0.051106 | 8.431627  | O                        | 2.513686  | -1.904390 | 1.310191  | O  | 1.722143  | 0.458669  | -0.702808 |
| H  | -0.501063 | 0.111204  | 9.338584  | H                        | 2.404075  | -0.926935 | 1.017754  | FE | 2.319152  | 2.263281  | 1.633096  |
| C  | 1.213048  | 0.516642  | 8.198987  | H                        | 1.828437  | -2.125686 | 1.961296  | N  | 3.060529  | 1.184323  | 3.123743  |
| H  | 1.634878  | 0.168277  | 7.253489  | O                        | 1.682541  | -3.380188 | -2.366907 | N  | 0.494155  | 1.514521  | 2.033873  |
| C  | 1.166937  | 2.100839  | 8.150356  | H                        | 2.091035  | -3.689194 | -3.211104 | N  | 1.587143  | 3.201515  | -0.007880 |
| H  | 0.884857  | 2.442352  | 9.153050  | H                        | 2.355206  | -2.843815 | -1.842013 | N  | 4.154569  | 2.810884  | 1.101640  |
| H  | 2.186611  | 2.470163  | 7.966958  | h                        | 2.533933  | 5.102386  | 2.682373  | C  | 4.271677  | 1.438071  | 3.749768  |
| N  | 0.412368  | 2.778066  | 5.801798  | h                        | 5.098221  | 0.756794  | 5.646679  | C  | 4.380438  | 0.625256  | 4.956371  |
| H  | 1.269793  | 2.612611  | 5.291583  | h                        | 3.097706  | -1.170160 | 5.494874  | C  | 3.309815  | -0.244031 | 4.952080  |
| C  | 0.196724  | 2.666841  | 7.175102  | h                        | -1.727802 | -0.641706 | 3.336872  | C  | 2.448587  | 0.172992  | 3.845381  |
| C  | -0.710068 | 3.307144  | 5.228182  | h                        | -2.963770 | 1.307139  | 1.916404  | C  | 0.209844  | 0.412565  | 2.822142  |
| H  | -0.777891 | 3.517344  | 4.175926  | h                        | -0.936503 | 4.682299  | -1.786520 | C  | -1.222578 | 0.137249  | 2.793417  |
| N  | -1.641803 | 3.535620  | 6.157237  | h                        | 1.666652  | 5.038713  | -2.880824 | C  | -1.823100 | 1.143075  | 2.055451  |
| C  | -1.079274 | 3.147907  | 7.374813  | h                        | 6.547836  | 3.652160  | -1.142582 | C  | -0.719860 | 1.964579  | 1.522746  |
| H  | -1.608578 | 3.256668  | 8.306046  | h                        | 7.481220  | 2.850023  | 1.321165  | C  | 0.241674  | 3.478336  | -0.225448 |
| C  | 2.123843  | 0.154366  | 9.387433  | h                        | -0.595656 | -0.683323 | 7.840540  | C  | 0.086313  | 4.314493  | -1.409370 |
| O  | 1.615496  | 0.150822  | 10.530219 | h                        | 3.186467  | -0.046432 | 9.251139  | C  | 1.359335  | 4.517471  | -1.941635 |
| S  | 2.000860  | 3.909915  | 3.127562  | h                        | -0.901930 | -4.393071 | -4.801669 | C  | 2.292133  | 3.841053  | -1.030954 |
| H  | 1.463563  | 1.412011  | -0.973672 | h                        | -2.551079 | -1.713908 | -1.293716 | C  | 4.559377  | 3.305038  | -0.133995 |
| O  | 2.472583  | 0.530035  | 0.432984  |                          |           |           |           | C  | 6.018951  | 3.355843  | -0.191183 |
| O  | 1.525197  | 0.446030  | -0.763056 | <b>Conf LM3 – TShooh</b> |           |           |           | C  | 6.480122  | 2.977451  | 1.057028  |
| Fe | 2.283691  | 2.143498  | 1.501878  | C                        | -1.321470 | -5.454907 | -4.667819 | C  | 5.305501  | 2.640397  | 1.855968  |
| N  | 3.046140  | 1.103880  | 3.024604  | H                        | -1.800455 | -5.395438 | -3.684183 | C  | 5.315840  | 2.138960  | 3.158712  |
| N  | 0.431858  | 1.521982  | 1.976031  | H                        | -2.076105 | -5.755972 | -5.402830 | H  | 6.254628  | 2.186802  | 3.699122  |
| N  | 1.535064  | 3.204873  | -0.056699 | C                        | -0.227486 | -6.534011 | -4.637772 | C  | 1.138800  | -0.249066 | 3.630605  |
| N  | 4.130716  | 2.711468  | 1.005783  | O                        | -0.062441 | -7.270590 | -5.662495 | H  | 0.769880  | -1.055886 | 4.256211  |
| C  | 4.255480  | 1.353072  | 3.649315  | O                        | 0.478529  | -6.640305 | -3.538752 | C  | -0.806233 | 2.903652  | 0.498319  |
| C  | 4.349985  | 0.568502  | 4.876772  | H                        | 0.073976  | -6.006779 | -2.287604 | H  | -1.789738 | 3.103873  | 0.102412  |
| C  | 3.261099  | -0.277229 | 4.891513  | C                        | -1.885568 | -1.283070 | -0.592638 | C  | 3.689122  | 3.786847  | -1.109899 |
| C  | 2.406960  | 0.136058  | 3.771858  | H                        | -2.440692 | -1.033787 | 0.320788  | H  | 4.161342  | 4.191720  | -1.999038 |
| C  | 0.147744  | 0.439348  | 2.785334  | O                        | -1.363007 | -0.063482 | -1.204681 | O  | -0.103942 | -5.383448 | -1.441463 |
| C  | -1.291443 | 0.189751  | 2.783396  | H                        | -0.464612 | 0.111017  | -0.850900 | H  | 0.689646  | -4.288061 | -2.076974 |
| C  | -1.886323 | 1.188760  | 2.031119  | C                        | -0.757861 | -2.251917 | -0.233270 | H  | 0.537083  | -5.560109 | -0.703396 |
| C  | -0.777463 | 1.984708  | 1.475022  | H                        | -0.138724 | -1.809150 | 0.556025  | O  | 2.674281  | -2.096825 | -1.178377 |
| C  | 0.195295  | 3.496560  | -0.266795 | H                        | -1.133893 | -3.217011 | 0.123802  | H  | 2.650937  | -2.102498 | 0.108570  |
| C  | 0.042901  | 4.347937  | -1.444414 | H                        | -0.120991 | -2.436560 | -1.100013 | H  | 2.438133  | -1.172215 | -1.413614 |
| C  | 1.315327  | 4.539498  | -1.977817 | N                        | -0.094888 | -0.054816 | 8.434766  | O  | 2.624110  | -1.744815 | 1.188484  |
| C  | 2.244252  | 3.836564  | -1.074177 | H                        | -0.502466 | 0.104475  | 9.341810  | H  | 2.582046  | -0.487405 | 0.960505  |
| C  | 4.521660  | 3.259955  | -0.209400 | C                        | 1.214248  | 0.510028  | 8.207996  | H  | 1.936034  | -2.088350 | 1.779375  |
| C  | 5.980988  | 3.353984  | -0.260629 | H                        | 1.639167  | 0.162743  | 7.263356  | O  | 1.416443  | -3.677781 | -2.468752 |
| C  | 6.452304  | 2.949962  | 0.975605  | C                        | 1.164596  | 2.092875  | 8.162912  | H  | 1.862053  | -4.044632 | -3.267605 |
| C  | 5.287254  | 2.554406  | 1.758831  | H                        | 0.878930  | 2.433451  | 9.164654  | H  | 2.075896  | -2.812734 | -1.739429 |
| C  | 5.303176  | 2.047989  | 3.057256  | H                        | 2.182667  | 2.467929  | 7.982210  | h  | 2.527981  | 5.173695  | 2.677355  |
| H  | 6.239119  | 2.106779  | 3.602023  | N                        | 0.399638  | 2.724384  | 5.808632  | h  | 5.138322  | 0.793721  | 5.721419  |
| C  | 1.076227  | -0.236881 | 3.586302  | H                        | 1.247448  | 2.508807  | 5.304902  | h  | 3.159807  | -1.153220 | 5.534266  |
| H  | 0.690740  | -1.017385 | 4.235937  | C                        | 0.192881  | 2.653027  | 7.186164  | h  | -1.656971 | -0.711707 | 3.321283  |
| C  | -0.856712 | 2.929740  | 0.455265  | C                        | -0.718912 | 3.257820  | 5.229264  | h  | -2.901013 | 1.256861  | 1.940457  |

|   |           |           |           |   |           |          |           |   |           |           |          |
|---|-----------|-----------|-----------|---|-----------|----------|-----------|---|-----------|-----------|----------|
| h | -0.896074 | 4.637057  | -1.754239 | C | -1.222366 | 0.140265 | 2.793949  | H | -0.315501 | 0.283349  | 2.223718 |
| h | 1.707395  | 5.011502  | -2.848748 | C | -1.823082 | 1.145927 | 2.056146  | C | 0.625393  | -2.346752 | 2.046933 |
| h | 6.590107  | 3.609769  | -1.084138 | C | -0.720579 | 1.968251 | 1.524162  | H | 1.420076  | -1.712122 | 2.451215 |
| h | 7.507241  | 2.864683  | 1.403980  | C | 0.240470  | 3.480874 | -0.224676 | H | 0.705000  | -3.327596 | 2.531407 |
| h | -0.595887 | -0.684570 | 7.841149  | C | 0.086041  | 4.316251 | -1.408698 | H | 0.811454  | -2.468951 | 0.978220 |
| h | 3.184527  | -0.060668 | 9.264448  | C | 1.359421  | 4.518722 | -1.940808 | N | 6.440598  | 2.253696  | 6.771388 |
| h | -0.976909 | -4.456789 | -4.938199 | C | 2.292071  | 3.843778 | -1.029426 | H | 6.873394  | 2.525531  | 7.641895 |
| h | -2.560922 | -1.745808 | -1.312246 | C | 4.558589  | 3.307614 | -0.131848 | C | 7.081987  | 2.691216  | 5.560775 |

**Conf LM3 –Fe RS**

|    |           |           |           |
|----|-----------|-----------|-----------|
| C  | -1.322928 | -5.455331 | -4.668120 |
| H  | -1.799778 | -5.395357 | -3.683331 |
| H  | -2.079686 | -5.755720 | -5.401299 |
| C  | -0.229069 | -6.535128 | -4.640871 |
| O  | -0.066458 | -7.271281 | -5.666738 |
| O  | 0.477436  | -6.643320 | -3.542822 |
| H  | 0.068038  | -6.010519 | -2.285400 |
| C  | -1.885770 | -1.286399 | -0.592369 |
| H  | -2.440621 | -1.039784 | 0.322118  |
| O  | -1.367092 | -0.063051 | -1.201778 |
| H  | -0.467253 | 0.108765  | -0.851248 |
| C  | -0.754795 | -2.253318 | -0.238118 |
| H  | -0.135192 | -1.810599 | 0.551166  |
| H  | -1.128493 | -3.219655 | 0.118189  |
| H  | -0.118770 | -2.435829 | -1.106049 |
| N  | -0.094754 | -0.054786 | 8.434993  |
| H  | -0.502187 | 0.104062  | 9.342232  |
| C  | 1.214479  | 0.510460  | 8.208848  |
| H  | 1.638947  | 0.162659  | 7.264334  |
| C  | 1.164861  | 2.093394  | 8.164269  |
| H  | 0.879361  | 2.433029  | 9.166395  |
| H  | 2.183256  | 2.467817  | 7.983365  |
| N  | 0.399529  | 2.723525  | 5.810156  |
| H  | 1.247111  | 2.506180  | 5.307030  |
| C  | 0.193057  | 2.653499  | 7.187708  |
| C  | -0.718986 | 3.257384  | 5.230549  |
| H  | -0.797646 | 3.442174  | 4.174512  |
| N  | -1.637721 | 3.527072  | 6.160036  |
| C  | -1.072847 | 3.160925  | 7.383684  |
| H  | -1.595662 | 3.298467  | 8.314450  |
| C  | 2.122772  | 0.145887  | 9.399381  |
| O  | 1.611749  | 0.150391  | 10.540311 |
| S  | 1.966060  | 4.000372  | 3.130034  |
| H  | 1.577713  | 1.448264  | -0.827417 |
| O  | 2.682061  | 0.564091  | 0.470987  |
| O  | 1.713577  | 0.467086  | -0.704689 |
| Fe | 2.318056  | 2.272619  | 1.639568  |
| N  | 3.059650  | 1.189122  | 3.125140  |
| N  | 0.494065  | 1.518754  | 2.035362  |
| N  | 1.586576  | 3.203696  | -0.006007 |
| N  | 4.153694  | 2.814164  | 1.104409  |
| C  | 4.271251  | 1.441896  | 3.751659  |
| C  | 4.379595  | 0.628209  | 4.957434  |
| C  | 3.308938  | -0.240987 | 4.952186  |
| C  | 2.447845  | 0.176600  | 3.846059  |
| C  | 0.209467  | 0.416458  | 2.823734  |

|   |           |           |           |
|---|-----------|-----------|-----------|
| C | -1.222366 | 0.140265  | 2.793949  |
| C | -1.823082 | 1.145927  | 2.056146  |
| C | -0.720579 | 1.968251  | 1.524162  |
| C | 0.240470  | 3.480874  | -0.224676 |
| C | 0.086041  | 4.316251  | -1.408698 |
| C | 1.359421  | 4.518722  | -1.940808 |
| C | 2.292071  | 3.843778  | -1.029426 |
| C | 4.558589  | 3.307614  | -0.131848 |
| C | 6.018105  | 3.356924  | -0.189783 |
| C | 6.479692  | 2.978960  | 1.058432  |
| C | 5.305475  | 2.643097  | 1.858022  |
| C | 5.315780  | 2.142036  | 3.160734  |
| H | 6.255236  | 2.188247  | 3.700316  |
| C | 1.138247  | -0.244907 | 3.631799  |
| H | 0.770329  | -1.054007 | 4.254949  |
| C | -0.807434 | 2.906336  | 0.498907  |
| H | -1.791105 | 3.105731  | 0.103112  |
| C | 3.688646  | 3.789380  | -1.107958 |
| H | 4.161238  | 4.193080  | -1.997647 |
| O | -0.115222 | -5.391909 | -1.440521 |
| H | 0.680945  | -4.291211 | -2.087359 |
| H | 0.529384  | -5.562133 | -0.704208 |
| O | 2.690910  | -2.104413 | -1.197611 |
| H | 2.660268  | -2.114453 | 0.165628  |
| H | 2.449861  | -1.182171 | -1.428604 |
| O | 2.625523  | -1.770285 | 1.198915  |
| H | 2.575089  | -0.422917 | 0.935369  |
| H | 1.923287  | -2.132622 | 1.760990  |
| O | 1.404393  | -3.684509 | -2.480723 |
| H | 1.853538  | -4.059992 | -3.273123 |
| H | 2.088180  | -2.803878 | -1.744508 |
| h | 2.526734  | 5.177668  | 2.678410  |
| h | 5.138047  | 0.795799  | 5.722110  |
| h | 3.159339  | -1.151345 | 5.532646  |
| h | -1.656418 | -0.709331 | 3.321065  |
| h | -2.901022 | 1.258393  | 1.940109  |
| h | -0.896215 | 4.638422  | -1.754307 |
| h | 1.707666  | 5.012134  | -2.848187 |
| h | 6.589146  | 3.610213  | -1.082993 |
| h | 7.506799  | 2.865340  | 1.405143  |
| h | -0.595770 | -0.684461 | 7.841306  |
| h | 3.184422  | -0.061309 | 9.265089  |
| h | -0.978480 | -4.457424 | -4.939421 |
| h | -2.561555 | -1.747811 | -1.312425 |

**Conf LM4 –RC**

|   |           |           |           |
|---|-----------|-----------|-----------|
| C | -0.931816 | -4.469177 | -2.917540 |
| H | -1.610892 | -5.147840 | -3.438592 |
| H | -0.092145 | -4.265446 | -3.599679 |
| C | -0.366784 | -5.209967 | -1.726092 |
| O | -0.498305 | -6.448945 | -1.625039 |
| O | 0.343079  | -4.525722 | -0.814275 |
| H | 0.671491  | -3.526122 | -1.051237 |
| C | -0.733980 | -1.698234 | 2.321815  |
| H | -0.851885 | -1.579376 | 3.408808  |
| O | -0.824793 | -0.377250 | 1.689220  |

|    |           |           |           |
|----|-----------|-----------|-----------|
| H  | -0.315501 | 0.283349  | 2.223718  |
| C  | 0.625393  | -2.346752 | 2.046933  |
| H  | 1.420076  | -1.712122 | 2.451215  |
| H  | 0.705000  | -3.327596 | 2.531407  |
| H  | 0.811454  | -2.468951 | 0.978220  |
| N  | 6.440598  | 2.253696  | 6.771388  |
| H  | 6.873394  | 2.525531  | 7.641895  |
| C  | 7.081987  | 2.691216  | 5.560775  |
| H  | 7.114801  | 1.902975  | 4.793723  |
| C  | 6.379587  | 3.973147  | 4.894607  |
| H  | 6.955537  | 4.859862  | 5.183177  |
| H  | 6.469889  | 3.894716  | 3.804117  |
| N  | 3.910148  | 4.133689  | 4.338099  |
| H  | 4.003820  | 3.957608  | 3.349283  |
| C  | 4.948040  | 4.198966  | 5.266167  |
| C  | 2.741408  | 4.474020  | 4.965850  |
| H  | 1.798458  | 4.527873  | 4.453532  |
| N  | 2.963465  | 4.753341  | 6.251156  |
| C  | 4.334416  | 4.577394  | 6.446906  |
| H  | 4.790617  | 4.729857  | 7.409840  |
| C  | 8.541608  | 3.039164  | 5.927953  |
| O  | 8.848895  | 3.143411  | 7.132919  |
| S  | 2.363438  | 5.823272  | 1.754513  |
| H  | 1.665649  | 1.012480  | -0.835672 |
| O  | 2.252161  | 2.816529  | -1.458785 |
| O  | 2.555530  | 1.367923  | -1.096210 |
| FE | 2.266464  | 4.157489  | 0.023746  |
| N  | 4.221066  | 3.807848  | 0.360265  |
| N  | 1.809990  | 2.787353  | 1.445744  |
| N  | 0.306207  | 4.553078  | -0.276110 |
| N  | 2.741173  | 5.488562  | -1.370595 |
| C  | 5.267574  | 4.665687  | 0.041549  |
| C  | 6.527057  | 4.129282  | 0.563372  |
| C  | 6.232299  | 2.898676  | 1.116977  |
| C  | 4.779436  | 2.740496  | 1.044585  |
| C  | 2.674136  | 1.884872  | 2.037151  |
| C  | 2.000662  | 1.192716  | 3.128614  |
| C  | 0.725695  | 1.743797  | 3.241528  |
| C  | 0.597248  | 2.683307  | 2.111169  |
| C  | -0.720086 | 4.100644  | 0.527133  |
| C  | -1.995845 | 4.646758  | 0.067812  |
| C  | -1.730764 | 5.453625  | -1.026911 |
| C  | -0.275072 | 5.363609  | -1.243997 |
| C  | 1.875799  | 6.078177  | -2.274534 |
| C  | 2.605149  | 7.024019  | -3.115061 |
| C  | 3.899300  | 7.056405  | -2.634543 |
| C  | 3.983874  | 6.083306  | -1.549300 |
| C  | 5.128989  | 5.755467  | -0.816859 |
| H  | 6.026535  | 6.335353  | -1.000509 |
| C  | 4.040345  | 1.795374  | 1.753546  |
| H  | 4.601561  | 1.019860  | 2.262673  |
| C  | -0.576391 | 3.260639  | 1.628924  |
| H  | -1.499806 | 2.987417  | 2.122069  |
| C  | 0.485299  | 5.965466  | -2.245521 |
| H  | -0.034567 | 6.424628  | -3.075035 |
| O  | 4.859421  | 0.593183  | -3.791852 |

|   |           |           |           |    |           |          |           |   |           |           |           |
|---|-----------|-----------|-----------|----|-----------|----------|-----------|---|-----------|-----------|-----------|
| H | 4.150690  | 1.317697  | -3.854042 | N  | 2.960544  | 4.741840 | 6.221982  | h | 2.560934  | 0.468161  | 3.693062  |
| H | 4.816594  | -0.011409 | -4.549916 | C  | 4.330462  | 4.566387 | 6.423844  | h | 0.129580  | 1.584126  | 4.054510  |
| O | 2.947458  | 2.414510  | -3.863758 | H  | 4.782463  | 4.718407 | 7.388823  | h | -2.911862 | 4.423927  | 0.582327  |
| H | 2.230870  | 2.032491  | -4.403706 | C  | 8.543553  | 3.035903 | 5.925152  | h | -2.480268 | 6.046088  | -1.548100 |
| H | 2.603115  | 2.627124  | -2.887886 | O  | 8.849202  | 3.141885 | 7.130327  | h | 2.148053  | 7.649848  | -3.914805 |
| O | 1.311536  | -2.326848 | -1.333203 | S  | 2.354489  | 5.828303 | 1.733995  | h | 4.719138  | 7.737011  | -2.989888 |
| H | 2.357993  | -2.374122 | -1.248743 | H  | 1.664564  | 0.923404 | -0.976034 | h | 5.838809  | 1.455917  | 6.797726  |
| H | 0.947687  | -1.427117 | -1.173898 | O  | 2.291362  | 3.060968 | -1.427028 | h | 9.293043  | 3.213020  | 5.153815  |
| O | 4.801685  | -0.086339 | -1.233106 | O  | 2.531841  | 1.111106 | -1.417642 | h | -1.427192 | -3.504809 | -2.762090 |
| H | 4.119849  | 0.530209  | -0.859790 | FE | 2.284126  | 4.126716 | -0.050715 | h | -1.550122 | -2.318738 | 1.944759  |
| H | 4.795675  | 0.058148  | -2.226852 | N  | 4.236589  | 3.847371 | 0.333238  |   |           |           |           |
| O | 3.777112  | -2.428956 | -1.096573 | N  | 1.836634  | 2.790538 | 1.385329  |   |           |           |           |
| H | 4.295453  | -1.554867 | -1.050335 | N  | 0.317583  | 4.565442 | -0.285087 |   |           |           |           |
| H | 4.299551  | -3.243368 | -0.942645 | N  | 2.752931  | 5.553057 | -1.361004 |   |           |           |           |
| h | 1.792049  | 7.012525  | 1.350115  | C  | 5.279196  | 4.716227 | 0.026328  |   |           |           |           |
| h | 7.478571  | 4.660843  | 0.574816  | C  | 6.539541  | 4.170147 | 0.533715  |   |           |           |           |
| h | 6.895593  | 2.133272  | 1.519797  | C  | 6.250002  | 2.926510 | 1.060068  |   |           |           |           |
| h | 2.510290  | 0.481319  | 3.778430  | C  | 4.799659  | 2.762427 | 0.982639  |   |           |           |           |
| h | 0.061635  | 1.578067  | 4.089834  | C  | 2.704429  | 1.876312 | 1.953619  |   |           |           |           |
| h | -2.928476 | 4.435617  | 0.590962  | C  | 2.044923  | 1.183203 | 3.052349  |   |           |           |           |
| h | -2.487411 | 6.036616  | -1.551956 | C  | 0.778257  | 1.745326 | 3.193523  |   |           |           |           |
| h | 2.150109  | 7.624144  | -3.903004 | C  | 0.631763  | 2.687276 | 2.070455  |   |           |           |           |
| h | 4.719615  | 7.684614  | -2.981681 | C  | -0.704464 | 4.103081 | 0.513542  |   |           |           |           |
| h | 5.838553  | 1.455708  | 6.798347  | C  | -1.981772 | 4.645936 | 0.059154  |   |           |           |           |
| h | 9.290393  | 3.215743  | 5.155808  | C  | -1.720228 | 5.461255 | -1.030049 |   |           |           |           |
| h | -1.433477 | -3.512816 | -2.769971 | C  | -0.263884 | 5.379785 | -1.248900 |   |           |           |           |
| h | -1.549668 | -2.310522 | 1.937338  | C  | 1.881910  | 6.124332 | -2.268815 |   |           |           |           |

**Conf LM4 –TSoo**

|   |           |           |           |
|---|-----------|-----------|-----------|
| C | -0.923992 | -4.459490 | -2.915187 |
| H | -1.597217 | -5.134644 | -3.447978 |
| H | -0.078648 | -4.245381 | -3.587097 |
| C | -0.367153 | -5.209199 | -1.725079 |
| O | -0.507346 | -6.448666 | -1.631339 |
| O | 0.343042  | -4.533403 | -0.809820 |
| H | 0.680366  | -3.526168 | -1.041252 |
| C | -0.733369 | -1.711106 | 2.334330  |
| H | -0.853232 | -1.596022 | 3.421620  |
| O | -0.822317 | -0.388110 | 1.706548  |
| H | -0.284186 | 0.263394  | 2.221691  |
| C | 0.622481  | -2.366862 | 2.058234  |
| H | 1.422430  | -1.746365 | 2.473421  |
| H | 0.690756  | -3.354074 | 2.531517  |
| H | 0.813176  | -2.478372 | 0.989176  |
| N | 6.440999  | 2.253737  | 6.769058  |
| H | 6.876816  | 2.524582  | 7.638537  |
| C | 7.084494  | 2.685287  | 5.556873  |
| H | 7.118440  | 1.894119  | 4.792510  |
| C | 6.383875  | 3.964671  | 4.883694  |
| H | 6.956080  | 4.853135  | 5.175022  |
| H | 6.481816  | 3.884592  | 3.793770  |
| N | 3.916386  | 4.123666  | 4.312476  |
| H | 4.015142  | 3.951423  | 3.323443  |
| C | 4.949811  | 4.188898  | 5.245917  |
| C | 2.744407  | 4.463581  | 4.935500  |
| H | 1.803837  | 4.517865  | 4.418821  |

|    |           |           |           |
|----|-----------|-----------|-----------|
| N  | 2.960544  | 4.741840  | 6.221982  |
| C  | 4.330462  | 4.566387  | 6.423844  |
| H  | 4.782463  | 4.718407  | 7.388823  |
| C  | 8.543553  | 3.035903  | 5.925152  |
| O  | 8.849202  | 3.141885  | 7.130327  |
| S  | 2.354489  | 5.828303  | 1.733995  |
| H  | 1.664564  | 0.923404  | -0.976034 |
| O  | 2.291362  | 3.060968  | -1.427028 |
| O  | 2.531841  | 1.111106  | -1.417642 |
| FE | 2.284126  | 4.126716  | -0.050715 |
| N  | 4.236589  | 3.847371  | 0.333238  |
| N  | 1.836634  | 2.790538  | 1.385329  |
| N  | 0.317583  | 4.565442  | -0.285087 |
| N  | 2.752931  | 5.553057  | -1.361004 |
| C  | 5.279196  | 4.716227  | 0.026328  |
| C  | 6.539541  | 4.170147  | 0.533715  |
| C  | 6.250002  | 2.926510  | 1.060068  |
| C  | 4.799659  | 2.762427  | 0.982639  |
| C  | 2.704429  | 1.876312  | 1.953619  |
| C  | 2.044923  | 1.183203  | 3.052349  |
| C  | 0.778257  | 1.745326  | 3.193523  |
| C  | 0.631763  | 2.687276  | 2.070455  |
| C  | -0.704464 | 4.103081  | 0.513542  |
| C  | -1.981772 | 4.645936  | 0.059154  |
| C  | -1.720228 | 5.461255  | -1.030049 |
| C  | -0.263884 | 5.379785  | -1.248900 |
| C  | 1.881910  | 6.124332  | -2.268815 |
| C  | 2.606617  | 7.068957  | -3.114585 |
| C  | 3.899890  | 7.111868  | -2.634789 |
| C  | 3.991610  | 6.145342  | -1.543874 |
| C  | 5.138880  | 5.816548  | -0.815483 |
| H  | 6.034639  | 6.399888  | -0.996143 |
| C  | 4.067032  | 1.791393  | 1.660131  |
| H  | 4.630342  | 1.000333  | 2.140990  |
| C  | -0.549604 | 3.261648  | 1.611221  |
| H  | -1.465295 | 2.985574  | 2.116725  |
| C  | 0.493474  | 5.995986  | -2.243352 |
| H  | -0.029509 | 6.454625  | -3.071107 |
| O  | 5.011489  | 0.645579  | -3.902269 |
| H  | 4.272014  | 1.330372  | -3.928696 |
| H  | 5.060052  | 0.144650  | -4.731923 |
| O  | 2.946113  | 2.358569  | -3.913665 |
| H  | 2.263602  | 1.840247  | -4.379338 |
| H  | 2.645948  | 2.501296  | -2.949777 |
| O  | 1.313546  | -2.344693 | -1.312935 |
| H  | 2.362413  | -2.383489 | -1.238653 |
| H  | 0.940854  | -1.443721 | -1.174268 |
| O  | 4.814106  | -0.123964 | -1.341456 |
| H  | 4.029714  | 0.443237  | -1.066866 |
| H  | 4.887211  | -0.006620 | -2.330486 |
| O  | 3.775552  | -2.447662 | -1.105429 |
| H  | 4.309743  | -1.580099 | -1.115301 |
| H  | 4.293724  | -3.264367 | -0.949226 |
| h  | 1.785867  | 7.026223  | 1.351890  |
| h  | 7.491306  | 4.701046  | 0.552600  |
| h  | 6.913705  | 2.157296  | 1.454877  |

**Conf LM4 –Cpd I**

|    |           |           |           |
|----|-----------|-----------|-----------|
| C  | -1.018969 | -4.587892 | -2.879965 |
| H  | -1.745369 | -5.246977 | -3.364743 |
| H  | -0.201158 | -4.439335 | -3.603780 |
| C  | -0.410654 | -5.334303 | -1.690557 |
| O  | -0.500778 | -6.605760 | -1.696566 |
| O  | 0.242255  | -4.658162 | -0.785629 |
| H  | 0.950141  | -3.344721 | -1.152951 |
| C  | -0.704042 | -1.752180 | 2.320726  |
| H  | -0.804341 | -1.645798 | 3.411222  |
| O  | -0.788144 | -0.417839 | 1.707025  |
| H  | -0.260010 | 0.220810  | 2.234700  |
| C  | 0.634877  | -2.422394 | 2.005672  |
| H  | 1.453464  | -1.822554 | 2.418038  |
| H  | 0.695422  | -3.417652 | 2.461559  |
| H  | 0.805143  | -2.529136 | 0.932300  |
| N  | 6.443889  | 2.252715  | 6.771595  |
| H  | 6.885203  | 2.512815  | 7.642209  |
| C  | 7.092586  | 2.686335  | 5.563480  |
| H  | 7.125765  | 1.899292  | 4.794995  |
| C  | 6.401620  | 3.974823  | 4.895095  |
| H  | 6.997368  | 4.855014  | 5.163535  |
| H  | 6.474836  | 3.884007  | 3.804358  |
| N  | 3.936755  | 4.222297  | 4.358079  |
| H  | 4.027181  | 4.089247  | 3.363418  |
| C  | 4.979379  | 4.226208  | 5.284253  |
| C  | 2.775427  | 4.559383  | 5.007345  |
| H  | 1.828659  | 4.649786  | 4.507867  |
| N  | 3.010175  | 4.782431  | 6.299319  |
| C  | 4.377904  | 4.570243  | 6.481669  |
| H  | 4.841037  | 4.674252  | 7.447202  |
| C  | 8.553036  | 3.032739  | 5.935198  |
| O  | 8.854925  | 3.140014  | 7.140484  |
| S  | 2.172339  | 6.038601  | 1.996025  |
| H  | 2.747936  | 2.143906  | -1.766579 |
| O  | 1.708860  | 2.958223  | -0.873654 |
| O  | 3.411978  | 1.796384  | -2.422613 |
| FE | 1.962664  | 4.178700  | 0.218815  |
| N  | 3.924356  | 3.833578  | 0.514535  |
| N  | 1.548021  | 2.958852  | 1.771202  |
| N  | 0.036126  | 4.733085  | 0.094626  |
| N  | 2.456485  | 5.531014  | -1.153724 |
| C  | 4.994945  | 4.617472  | 0.120424  |
| C  | 6.251186  | 4.040576  | 0.592014  |
| C  | 5.929647  | 2.826288  | 1.167456  |





|                        |           |           |           |    |           |            |           |                     |           |           |           |
|------------------------|-----------|-----------|-----------|----|-----------|------------|-----------|---------------------|-----------|-----------|-----------|
| C                      | 2.163317  | -5.663742 | 2.156036  | C  | -1.026510 | 0.344591   | -0.950088 | H                   | 0.234458  | -4.794369 | 0.536609  |
| C                      | 1.298787  | -4.490295 | 2.272448  | H  | -1.777002 | -0.455176  | -0.958001 | C                   | -2.075354 | -0.386407 | 3.238463  |
| C                      | -0.685707 | -3.151048 | 1.560850  | O  | -1.036055 | 0.960602   | 0.359726  | H                   | -2.965638 | 0.175105  | 2.989540  |
| C                      | -1.865591 | -2.935258 | 0.715289  | H  | -0.118111 | 0.967202   | 0.788451  | C                   | 1.669576  | 0.361896  | 6.186149  |
| C                      | -2.596940 | -1.909648 | 1.291271  | C  | 0.321733  | -0.283055  | -1.309012 | H                   | 2.035963  | 1.170442  | 6.809501  |
| C                      | -1.822449 | -1.483141 | 2.473713  | H  | 0.591105  | -1.035518  | -0.563970 | O                   | 2.600178  | -2.315557 | 0.289797  |
| C                      | -1.305543 | 0.155699  | 4.274383  | H  | 0.291324  | -0.768681  | -2.292210 | H                   | 1.825547  | -2.905968 | 0.314353  |
| C                      | -1.578009 | 1.398875  | 4.986589  | H  | 1.136981  | 0.444530   | -1.328142 | H                   | 2.549735  | -1.764812 | 1.110127  |
| C                      | -0.452067 | 1.697026  | 5.737582  | N  | -2.776512 | -8.186727  | -0.178844 | O                   | 2.403455  | -0.505013 | -4.205673 |
| C                      | 0.479378  | 0.577323  | 5.529382  | H  | -3.280039 | -9.007014  | 0.115965  | H                   | 1.809912  | -1.266298 | -4.345875 |
| C                      | 2.474048  | -0.776121 | 6.152255  | C  | -1.533832 | -7.902668  | 0.487215  | H                   | 3.047336  | -0.631869 | -2.662748 |
| C                      | 3.588457  | -1.030640 | 7.058568  | H  | -0.821272 | -7.412325  | -0.200785 | O                   | 3.438422  | 0.994092  | 0.081202  |
| C                      | 3.893068  | -2.370496 | 6.942777  | C  | -1.683863 | -6.923823  | 1.721766  | H                   | 4.290376  | 1.075998  | 0.541050  |
| C                      | 3.036267  | -2.907565 | 5.882410  | H  | -0.755040 | -6.943423  | 2.310908  | H                   | 2.101852  | 1.016333  | 0.988645  |
| C                      | 3.133035  | -4.174374 | 5.310404  | H  | -1.770311 | -5.916409  | 1.309679  | O                   | 3.421700  | -0.732580 | -1.738744 |
| H                      | 3.811361  | -4.883032 | 5.771925  | C  | -2.879349 | -7.176824  | 2.605864  | H                   | 3.494146  | 0.349088  | -0.727694 |
| C                      | 0.287942  | -4.134740 | 1.375950  | C  | -2.866517 | -8.132018  | 3.635567  | H                   | 3.059168  | -1.472786 | -1.191797 |
| H                      | 0.197793  | -4.763819 | 0.497089  | H  | -1.979530 | -8.739116  | 3.798150  | h                   | -0.850477 | -2.806798 | 6.758531  |
| C                      | -2.114106 | -0.394890 | 3.289330  | C  | -3.976540 | -8.288542  | 4.473479  | h                   | 3.642025  | -6.505042 | 3.668884  |
| H                      | -3.028279 | 0.144312  | 3.079265  | H  | -3.947977 | -9.003539  | 5.288460  | h                   | 2.302982  | -6.233235 | 1.278374  |
| C                      | 1.704645  | 0.382587  | 6.164526  | C  | -5.128173 | -7.522351  | 4.267373  | h                   | -2.006394 | -3.522971 | -0.218792 |
| H                      | 2.064595  | 1.174004  | 6.813544  | H  | -5.994342 | -7.667166  | 4.902761  | h                   | -3.458027 | -1.410587 | 0.931240  |
| O                      | 2.580598  | -2.292193 | 0.289747  | C  | -4.039455 | -6.409020  | 2.413236  | h                   | -2.527257 | 1.927360  | 4.841504  |
| H                      | 1.939178  | -3.026818 | 0.264165  | H  | -4.066948 | -5.667920  | 1.619727  | h                   | -0.212228 | 2.554239  | 6.335485  |
| H                      | 2.422951  | -1.831321 | 1.163731  | C  | -5.159983 | -6.590069  | 3.225933  | h                   | 4.020731  | -0.253623 | 7.708556  |
| O                      | 2.500485  | -0.297718 | -3.909078 | H  | -6.051129 | -6.006941  | 3.033836  | h                   | 4.609033  | -2.926213 | 7.577967  |
| H                      | 1.883501  | -1.048894 | -4.009346 | C  | -0.882491 | -9.238510  | 0.877352  | h                   | -3.107648 | -7.731191 | -1.005166 |
| H                      | 2.880444  | -0.327129 | -2.900198 | O  | -1.532095 | -10.302156 | 0.808085  | h                   | 0.160365  | -9.237011 | 1.194391  |
| O                      | 3.248891  | 0.914063  | 0.613730  | S  | -0.720205 | -3.399482  | 5.519135  | h                   | 2.137479  | 3.488654  | -3.763417 |
| H                      | 4.096626  | 0.860293  | 1.090307  | H  | 1.355137  | 0.255813   | 2.204883  | h                   | -1.288700 | 1.070636  | -1.719620 |
| H                      | 2.470713  | 0.624753  | 1.219272  | O  | 1.812438  | -1.297054  | 2.883238  |                     |           |           |           |
| O                      | 3.287181  | -0.530415 | -1.559477 | O  | 1.265686  | 0.988745   | 1.550627  |                     |           |           |           |
| H                      | 3.338849  | 0.187590  | -0.852397 | FE | 0.807529  | -2.057057  | 3.986434  | <b>Conf LW3 –RC</b> |           |           |           |
| H                      | 3.028182  | -1.344908 | -1.032579 | N  | 1.546186  | -3.860361  | 3.511266  | C                   | 4.061287  | 5.052025  | -1.300355 |
| h                      | -0.775691 | -2.796076 | 6.688741  | N  | -0.664420 | -2.272601  | 2.616564  | H                   | 3.931697  | 6.040854  | -1.745266 |
| h                      | 3.623794  | -6.498704 | 3.612851  | N  | -0.078474 | -0.373251  | 4.657083  | H                   | 5.067310  | 5.002938  | -0.873492 |
| h                      | 2.267579  | -6.230026 | 1.230553  | N  | 2.138420  | -1.943562  | 5.490985  | C                   | 3.929624  | 4.014139  | -2.397355 |
| h                      | -2.068973 | -3.502718 | -0.192836 | C  | 2.511721  | -4.600225  | 4.185619  | O                   | 3.233120  | 4.188314  | -3.412811 |
| h                      | -3.527419 | -1.419162 | 1.005438  | C  | 2.894353  | -5.763123  | 3.388510  | O                   | 4.607606  | 2.859421  | -2.234778 |
| h                      | -2.528838 | 1.925585  | 4.905553  | C  | 2.184663  | -5.675362  | 2.207269  | H                   | 5.093739  | 2.708263  | -1.293874 |
| h                      | -0.194243 | 2.550302  | 6.364889  | C  | 1.310679  | -4.516365  | 2.328356  | C                   | 0.842482  | 0.412494  | -1.467609 |
| h                      | 4.064178  | -0.255510 | 7.659341  | C  | -0.661554 | -3.177621  | 1.563395  | H                   | 0.019023  | -0.290914 | -1.655684 |
| h                      | 4.622642  | -2.932870 | 7.525464  | C  | -1.819057 | -2.955733  | 0.692917  | O                   | 1.159360  | 0.380574  | -0.046391 |
| h                      | -3.108218 | -7.730350 | -1.004466 | C  | -2.541626 | -1.912469  | 1.241707  | H                   | 1.280137  | -0.594264 | 0.284659  |
| h                      | 0.156203  | -9.223590 | 1.211569  | C  | -1.779516 | -1.487352  | 2.431866  | C                   | 2.055434  | -0.032265 | -2.293871 |
| h                      | 2.194760  | 3.522559  | -3.702011 | C  | -1.300172 | 0.145025   | 4.257840  | H                   | 2.338735  | -1.049842 | -2.004446 |
| h                      | -1.291879 | 1.063305  | -1.692425 | C  | -1.580185 | 1.398874   | 4.950243  | H                   | 1.847243  | -0.032451 | -3.370649 |
|                        |           |           |           | C  | -1.580185 | 1.398874   | 4.950243  | H                   | 2.916579  | 0.620354  | -2.121916 |
|                        |           |           |           | C  | -0.468881 | 1.693035   | 5.718620  | N                   | -3.388949 | -7.962215 | -2.121861 |
|                        |           |           |           | C  | 0.448082  | 0.555296   | 5.541473  | H                   | -3.381337 | -8.855524 | -2.591162 |
|                        |           |           |           | C  | 2.438412  | -0.797137  | 6.205932  | C                   | -2.790808 | -7.906788 | -0.799433 |
|                        |           |           |           | C  | 3.551753  | -1.035898  | 7.111755  | H                   | -2.093442 | -7.058718 | -0.697757 |
|                        |           |           |           | C  | 3.868400  | -2.374253  | 6.999288  | C                   | -3.849293 | -7.741297 | 0.368412  |
|                        |           |           |           | C  | 3.011489  | -2.920603  | 5.948692  | H                   | -3.294611 | -7.442405 | 1.262277  |
|                        |           |           |           | C  | 3.119017  | -4.186361  | 5.367676  | H                   | -4.485261 | -6.892748 | 0.089361  |
|                        |           |           |           | H  | 3.804678  | -4.888161  | 5.829223  | C                   | -4.692797 | -8.964028 | 0.661876  |
|                        |           |           |           | C  | 0.302776  | -4.165388  | 1.416880  | C                   | -4.392993 | -9.793197 | 1.757727  |
| <b>Conf LW1 –Cpd I</b> |           |           |           |    |           |            |           |                     |           |           |           |
| C                      | 2.380876  | 3.257894  | -4.800515 |    |           |            |           |                     |           |           |           |
| H                      | 2.631245  | 4.202697  | -5.290591 |    |           |            |           |                     |           |           |           |
| H                      | 3.282040  | 2.633027  | -4.776519 |    |           |            |           |                     |           |           |           |
| C                      | 1.292160  | 2.576946  | -5.616002 |    |           |            |           |                     |           |           |           |
| O                      | 0.639421  | 3.288075  | -6.444220 |    |           |            |           |                     |           |           |           |
| O                      | 1.089778  | 1.291208  | -5.448908 |    |           |            |           |                     |           |           |           |
| H                      | 1.929358  | 0.332487  | -4.591110 |    |           |            |           |                     |           |           |           |

|    |           |            |           |                       |           |            |           |                      |           |           |           |           |
|----|-----------|------------|-----------|-----------------------|-----------|------------|-----------|----------------------|-----------|-----------|-----------|-----------|
| H  | -3.534700 | -9.571026  | 2.382470  | h                     | 1.832267  | -4.725856  | -2.099478 | C                    | 2.943005  | -7.957250 | 3.259664  |           |
| C  | -5.169670 | -10.917581 | 2.049295  | h                     | -0.590476 | -3.568651  | -1.778623 | C                    | 3.927231  | -8.738310 | 2.507998  |           |
| H  | -4.922070 | -11.532083 | 2.908867  | h                     | -3.495157 | -2.733604  | 2.757303  | C                    | 3.885238  | -8.273288 | 1.211785  |           |
| C  | -6.261930 | -11.242727 | 1.239329  | h                     | -2.696060 | -2.661340  | 5.467774  | C                    | 2.883730  | -7.213485 | 1.173908  |           |
| H  | -6.871236 | -12.107726 | 1.478291  | h                     | 0.493502  | -5.956739  | 8.176477  | C                    | 1.522261  | -5.535253 | -0.036198 |           |
| C  | -5.791534 | -9.306994  | -0.144555 | h                     | 2.388091  | -7.778708  | 7.482102  | C                    | 1.135392  | -4.850709 | -1.258965 |           |
| H  | -6.035026 | -8.681393  | -0.994362 | h                     | -3.677849 | -7.151831  | -2.631553 | C                    | -0.074269 | -4.210944 | -1.011945 |           |
| C  | -6.564640 | -10.439435 | 0.132874  | h                     | -1.288144 | -9.334140  | 0.218264  | C                    | -0.379728 | -4.469492 | 0.407797  |           |
| H  | -7.408412 | -10.680491 | -0.507628 | h                     | 3.366424  | 4.954077   | -0.466306 | C                    | -1.535228 | -3.901474 | 2.534562  |           |
| C  | -1.966881 | -9.197454  | -0.623579 | h                     | 0.540530  | 1.425682   | -1.732828 | C                    | -2.553697 | -3.157852 | 3.268253  |           |
| O  | -2.087760 | -10.110727 | -1.468874 |                       |           |            |           | C                    | -2.180064 | -3.154831 | 4.603151  |           |
| S  | -0.692085 | -7.457576  | 2.796632  |                       |           |            |           | C                    | -0.987447 | -4.010366 | 4.694292  |           |
| H  | 0.803309  | -3.171027  | 3.411594  | <b>Conf LW3 –TSoo</b> | C         | 4.070923   | 5.046096  | -1.284713            | C         | 0.520463  | -5.546166 | 5.953291  |
| O  | 2.246005  | -4.373856  | 2.877937  | H                     | 3.949304  | 6.034821   | -1.732271 | C                    | 0.915538  | -6.217527 | 7.189814  |           |
| O  | 1.746497  | -2.949809  | 3.163559  | H                     | 5.073654  | 4.995053   | -0.849980 | C                    | 1.792395  | -7.217890 | 6.826783  |           |
| FE | 0.840926  | -5.691694  | 2.915425  | C                     | 3.946185  | 4.007442   | -2.380937 | C                    | 1.919564  | -7.181245 | 5.379038  |           |
| N  | 2.311423  | -6.998881  | 2.416005  | O                     | 3.271293  | 4.188897   | -3.409612 | C                    | 2.722239  | -8.032255 | 4.628493  |           |
| N  | 0.588604  | -5.229262  | 0.954828  | O                     | 4.606349  | 2.843443   | -2.202646 | H                    | 3.244379  | -8.824551 | 5.150296  |           |
| N  | -0.605316 | -4.330387  | 3.414598  | H                     | 5.013189  | 2.655185   | -1.230542 | C                    | 2.560769  | -6.453300 | 0.059689  |           |
| N  | 1.124933  | -6.090412  | 4.863686  | C                     | 0.829891  | 0.423144   | -1.574455 | H                    | 3.151861  | -6.620947 | -0.834235 |           |
| C  | 2.944874  | -7.899372  | 3.254928  | H                     | 0.045601  | -0.277568  | -1.897996 | C                    | -1.457445 | -3.985317 | 1.150159  |           |
| C  | 3.909005  | -8.707203  | 2.501741  | O                     | 0.982393  | 0.317798   | -0.131479 | H                    | -2.298935 | -3.588960 | 0.603154  |           |
| C  | 3.844195  | -8.270648  | 1.196830  | H                     | 1.168975  | -0.673899  | 0.160645  | C                    | -0.421083 | -4.523175 | 5.858512  |           |
| C  | 2.852955  | -7.200235  | 1.158607  | C                     | 2.129349  | 0.035442   | -2.291143 | H                    | -0.829479 | -4.169065 | 6.799432  |           |
| C  | 1.498713  | -5.510152  | -0.047569 | H                     | 2.413428  | -0.981000  | -1.999472 | O                    | 1.647405  | -2.005781 | 0.564064  |           |
| C  | 1.143602  | -4.788215  | -1.256911 | H                     | 2.016361  | 0.054826   | -3.381921 | H                    | 1.629636  | -2.243087 | 1.578544  |           |
| C  | -0.064420 | -4.140783  | -1.014426 | H                     | 2.953890  | 0.705271   | -2.029978 | H                    | 1.254225  | -2.724060 | 0.027661  |           |
| C  | -0.392230 | -4.425155  | 0.397357  | N                     | -3.385421 | -7.967203  | -2.118689 | O                    | 3.009461  | 1.603608  | 0.681923  |           |
| C  | -1.563597 | -3.842646  | 2.524121  | H                     | -3.384710 | -8.861232  | -2.586591 | H                    | 2.287614  | 0.976406  | 0.318116  |           |
| C  | -2.607703 | -3.128087  | 3.252152  | C                     | -2.781878 | -7.912705  | -0.798718 | H                    | 2.611966  | 2.116485  | 1.419147  |           |
| C  | -2.262116 | -3.149128  | 4.594950  | H                     | -2.080152 | -7.067699  | -0.700932 | O                    | 5.352632  | 2.248945  | 0.058547  |           |
| C  | -1.057056 | -3.986031  | 4.691082  | C                     | -3.835407 | -7.742963  | 0.373004  | H                    | 4.487891  | 1.829092  | 0.408345  |           |
| C  | 0.480269  | -5.508735  | 5.943532  | H                     | -3.275381 | -7.450044  | 1.265627  | H                    | 6.135633  | 1.670856  | 0.107574  |           |
| C  | 0.884582  | -6.171913  | 7.182081  | H                     | -4.467562 | -6.890322  | 0.097873  | h                    | -1.770452 | -7.323097 | 3.604894  |           |
| C  | 1.784419  | -7.154340  | 6.823458  | C                     | -4.685588 | -8.961424  | 0.665428  | h                    | 4.652811  | -9.434495 | 2.928626  |           |
| C  | 1.918149  | -7.112420  | 5.375353  | C                     | -4.384088 | -9.801002  | 1.752767  | h                    | 4.458452  | -8.599476 | 0.343975  |           |
| C  | 2.731141  | -7.958666  | 4.626940  | H                     | -3.520364 | -9.589742  | 2.373811  | h                    | 1.804268  | -4.811225 | -2.118681 |           |
| H  | 3.259482  | -8.743901  | 5.154359  | C                     | -5.166051 | -10.922828 | 2.040385  | h                    | -0.615564 | -3.643304 | -1.768814 |           |
| C  | 2.525354  | -6.444647  | 0.041899  | H                     | -4.916708 | -11.545389 | 2.893664  | h                    | -3.445263 | -2.761474 | 2.782391  |           |
| H  | 3.105589  | -6.621080  | -0.858211 | C                     | -6.265470 | -11.234797 | 1.234917  | h                    | -2.587985 | -2.639891 | 5.472923  |           |
| C  | -1.466940 | -3.924282  | 1.139709  | H                     | -6.878696 | -12.097825 | 1.470810  | h                    | 0.528504  | -5.999064 | 8.185075  |           |
| H  | -2.299896 | -3.517925  | 0.586813  | C                     | -5.792066 | -9.290729  | -0.136045 | h                    | 2.392832  | -7.847182 | 7.483695  |           |
| C  | -0.487536 | -4.506590  | 5.851899  | H                     | -6.037660 | -8.656487  | -0.978757 | h                    | -3.673022 | -7.156062 | -2.627912 |           |
| H  | -0.913302 | -4.176525  | 6.794648  | C                     | -6.570293 | -10.420728 | 0.136947  | h                    | -1.280193 | -9.344070 | 0.215322  |           |
| O  | 1.653100  | -2.009226  | 0.690561  | H                     | -7.419445 | -10.651330 | -0.500257 | h                    | 3.368758  | 4.951525  | -0.456409 |           |
| H  | 1.674531  | -2.315172  | 1.658971  | C                     | -1.962188 | -9.206032  | -0.623662 | h                    | 0.539020  | 1.444347  | -1.820635 |           |
| H  | 1.219698  | -2.686332  | 0.129393  | O                     | -2.090829 | -10.120807 | -1.466020 |                      |           |           |           |           |
| O  | 3.277217  | 1.604939   | 0.697816  | S                     | -0.662621 | -7.478125  | 2.796796  | <b>Conf LW3 –IC1</b> | C         | 4.103177  | 5.032877  | -1.239711 |
| H  | 2.557247  | 1.010114   | 0.301494  | H                     | 0.807363  | -2.941493  | 3.345450  | C                    | 4.004821  | 6.029083  | -1.676200 |           |
| H  | 2.847167  | 2.125075   | 1.409567  | O                     | 2.191681  | -4.520995  | 2.973294  | H                    | 5.095769  | 4.961517  | -0.784501 |           |
| O  | 5.558366  | 2.351504   | -0.029581 | O                     | 1.670262  | -2.550128  | 3.063820  | C                    | 3.989855  | 4.007909  | -2.350740 |           |
| H  | 4.733300  | 1.906234   | 0.376314  | FE                    | 0.915343  | -5.653687  | 2.937855  | O                    | 3.347652  | 4.217680  | -3.396569 |           |
| H  | 6.348415  | 1.779506   | -0.049997 | N                     | 2.315469  | -7.049783  | 2.423739  | O                    | 4.621813  | 2.831386  | -2.172520 |           |
| h  | -1.798473 | -7.294335  | 3.605090  | N                     | 0.620675  | -5.243160  | 0.970816  | H                    | 5.032023  | 2.636784  | -1.194434 |           |
| h  | 4.638486  | -9.399427  | 2.922158  | N                     | -0.574306 | -4.390972  | 3.417640  | C                    | 0.820435  | 0.462890  | -1.559195 |           |
| h  | 4.384195  | -8.630156  | 0.320919  | N                     | 1.142004  | -6.146058  | 4.873554  |                      |           |           |           |           |

|    |           |            |           |                        |           |            |           |    |           |            |           |
|----|-----------|------------|-----------|------------------------|-----------|------------|-----------|----|-----------|------------|-----------|
| H  | 0.024809  | -0.240044  | -1.851173 | C                      | -1.368391 | -4.108056  | 1.084942  | H  | -6.904985 | -12.135842 | 1.455979  |
| O  | 0.995674  | 0.397546   | -0.118855 | H                      | -2.228635 | -3.780088  | 0.522234  | C  | -5.803545 | -9.332010  | -0.146974 |
| H  | 1.100914  | -0.601864  | 0.195977  | C                      | -0.325780 | -4.503062  | 5.789365  | H  | -6.045970 | -8.696522  | -0.989663 |
| C  | 2.105030  | 0.043395   | -2.284052 | H                      | -0.732888 | -4.127668  | 6.722399  | C  | -6.587229 | -10.458508 | 0.124934  |
| H  | 2.376985  | -0.971475  | -1.974573 | O                      | 1.408962  | -1.951840  | 0.623313  | H  | -7.436185 | -10.685117 | -0.513557 |
| H  | 1.981405  | 0.044022   | -3.373987 | H                      | 1.133245  | -2.112910  | 1.621133  | C  | -1.963769 | -9.242458  | -0.624321 |
| H  | 2.941689  | 0.705612   | -2.042886 | H                      | 1.043949  | -2.651740  | 0.044022  | O  | -2.098978 | -10.163310 | -1.456807 |
| N  | -3.380971 | -7.984761  | -2.111593 | O                      | 3.065984  | 1.581473   | 0.753024  | S  | -0.638660 | -7.524418  | 2.785556  |
| H  | -3.382162 | -8.878123  | -2.580484 | H                      | 2.336001  | 0.995888   | 0.342411  | H  | 1.576356  | -2.816070  | 3.287875  |
| C  | -2.783366 | -7.932623  | -0.788291 | H                      | 2.648980  | 2.094387   | 1.478689  | O  | 2.220473  | -4.553312  | 3.134377  |
| H  | -2.084027 | -7.086318  | -0.686237 | O                      | 5.371714  | 2.263654   | 0.081193  | O  | 1.216008  | -1.977410  | 2.929780  |
| C  | -3.844007 | -7.765170  | 0.377685  | H                      | 4.514385  | 1.841108   | 0.457162  | FE | 1.029808  | -5.713214  | 2.953043  |
| H  | -3.289063 | -7.471920  | 1.272918  | H                      | 6.175164  | 1.721105   | 0.170651  | N  | 2.407031  | -7.123564  | 2.449954  |
| H  | -4.474600 | -6.912122  | 0.099489  | h                      | -1.740862 | -7.312965  | 3.576134  | N  | 0.750506  | -5.311041  | 0.984143  |
| C  | -4.698166 | -8.982003  | 0.666376  | h                      | 4.755662  | -9.460709  | 2.969221  | N  | -0.503800 | -4.503877  | 3.400841  |
| C  | -4.405882 | -9.819591  | 1.757950  | h                      | 4.657508  | -8.557078  | 0.406340  | N  | 1.172772  | -6.263720  | 4.869459  |
| H  | -3.546521 | -9.608099  | 2.385044  | h                      | 1.975079  | -4.793327  | -2.124693 | C  | 3.017653  | -8.050668  | 3.286223  |
| C  | -5.194433 | -10.937458 | 2.044380  | h                      | -0.505453 | -3.793760  | -1.837137 | C  | 4.041713  | -8.792168  | 2.555810  |
| H  | -4.950609 | -11.559259 | 2.899906  | h                      | -3.375050 | -2.866588  | 2.684578  | C  | 4.045660  | -8.289006  | 1.271034  |
| C  | -6.291984 | -11.246752 | 1.234819  | h                      | -2.519701 | -2.660471  | 5.371224  | C  | 3.029197  | -7.251915  | 1.226269  |
| H  | -6.910056 | -12.107485 | 1.467966  | h                      | 0.527786  | -6.019476  | 8.150262  | C  | 1.651793  | -5.605005  | -0.025057 |
| C  | -5.803540 | -9.307598  | -0.138289 | h                      | 2.296763  | -7.943120  | 7.497279  | C  | 1.238334  | -4.981119  | -1.269855 |
| H  | -6.043146 | -8.674116  | -0.983297 | h                      | -3.669160 | -7.171490  | -2.617072 | C  | 0.018498  | -4.360501  | -1.030337 |
| C  | -6.588984 | -10.432715 | 0.134585  | h                      | -1.278168 | -9.355447  | 0.230778  | C  | -0.261747 | -4.575588  | 0.398453  |
| H  | -7.438001 | -10.659456 | -0.504191 | h                      | 3.385969  | 4.938228   | -0.424407 | C  | -1.434765 | -3.986576  | 2.516859  |
| C  | -1.960554 | -9.224554  | -0.609034 | h                      | 0.535559  | 1.482623   | -1.818148 | C  | -2.443634 | -3.210112  | 3.233822  |
| O  | -2.087758 | -10.142732 | -1.447981 |                        |           |            |           | C  | -2.063146 | -3.185858  | 4.562917  |
| S  | -0.637181 | -7.458004  | 2.760537  | <b>Conf LW3 –Cpd I</b> |           |            |           | C  | -0.879175 | -4.057311  | 4.653711  |
| H  | 1.523134  | -3.090767  | 3.288315  | C                      | 4.132828  | 4.945289   | -1.142055 | C  | 0.577913  | -5.626745  | 5.946571  |
| O  | 2.265483  | -4.522482  | 3.080527  | H                      | 4.083093  | 5.954735   | -1.557727 | C  | 0.922196  | -6.311025  | 7.184761  |
| O  | 0.912738  | -2.303510  | 3.095584  | H                      | 5.104786  | 4.827522   | -0.651028 | C  | 1.744749  | -7.359383  | 6.830323  |
| FE | 1.046059  | -5.683505  | 2.925628  | C                      | 4.034908  | 3.933358   | -2.277069 | C  | 1.901183  | -7.320212  | 5.388607  |
| N  | 2.414213  | -7.087876  | 2.431510  | O                      | 3.403770  | 4.258365   | -3.331640 | C  | 2.727179  | -8.163620  | 4.641341  |
| N  | 0.764515  | -5.280710  | 0.951406  | O                      | 4.593796  | 2.763073   | -2.103913 | H  | 3.229912  | -8.961704  | 5.174271  |
| N  | -0.449308 | -4.387070  | 3.351626  | H                      | 4.847069  | 2.299090   | -0.666641 | C  | 2.717538  | -6.483166  | 0.106016  |
| N  | 1.198366  | -6.190171  | 4.851913  | C                      | 0.753498  | 0.494582   | -1.835144 | H  | 3.345881  | -6.623257  | -0.767098 |
| C  | 3.019370  | -8.005064  | 3.275979  | H                      | 0.052045  | -0.173780  | -2.350992 | C  | -1.349884 | -4.096874  | 1.134802  |
| C  | 4.040305  | -8.755362  | 2.546353  | O                      | 0.610593  | 0.195456   | -0.417145 | H  | -2.191469 | -3.718044  | 0.575518  |
| C  | 4.045249  | -8.261169  | 1.258186  | H                      | 1.343039  | -1.212543  | -0.040060 | C  | -0.304309 | -4.555389  | 5.824437  |
| C  | 3.033081  | -7.217433  | 1.201859  | C                      | 2.159261  | 0.181041   | -2.350145 | H  | -0.659672 | -4.136362  | 6.759493  |
| C  | 1.692462  | -5.545672  | -0.041813 | H                      | 2.430915  | -0.837880  | -2.056866 | O  | 1.815776  | -2.069779  | 0.197944  |
| C  | 1.300502  | -4.885382  | -1.273496 | H                      | 2.197889  | 0.242913   | -3.444310 | H  | 1.410030  | -1.983386  | 1.960239  |
| C  | 0.051479  | -4.312286  | -1.056737 | H                      | 2.919828  | 0.859863   | -1.954234 | H  | 1.391818  | -2.800603  | -0.290166 |
| C  | -0.262862 | -4.568713  | 0.361894  | N                      | -3.382608 | -7.995078  | -2.119993 | O  | 2.408965  | 1.529731   | 0.727387  |
| C  | -1.435950 | -3.954784  | 2.458338  | H                      | -3.391213 | -8.885396  | -2.594197 | H  | 1.312754  | 0.733685   | 0.104628  |
| C  | -2.475309 | -3.231126  | 3.180203  | C                      | -2.786029 | -7.950552  | -0.798165 | H  | 2.124238  | 2.071772   | 1.493475  |
| C  | -2.096027 | -3.179154  | 4.511262  | H                      | -2.086331 | -7.104309  | -0.692739 | O  | 4.844240  | 1.929029   | 0.292089  |
| C  | -0.876933 | -3.993759  | 4.620240  | C                      | -3.846362 | -7.788184  | 0.369906  | H  | 3.435174  | 1.547638   | 0.595030  |
| C  | 0.582443  | -5.558848  | 5.911415  | H                      | -3.293942 | -7.495179  | 1.267396  | H  | 5.628780  | 1.379498   | 0.462808  |
| C  | 0.921307  | -6.241580  | 7.158356  | H                      | -4.478034 | -6.935655  | 0.093314  | h  | -1.754144 | -7.378190  | 3.584718  |
| C  | 1.760278  | -7.280837  | 6.817844  | C                      | -4.697320 | -9.007563  | 0.656796  | h  | 4.758090  | -9.500551  | 2.971820  |
| C  | 1.929795  | -7.250337  | 5.373994  | C                      | -4.401785 | -9.848654  | 1.744449  | h  | 4.658528  | -8.578599  | 0.417456  |
| C  | 2.744194  | -8.103723  | 4.638068  | H                      | -3.539395 | -9.642015  | 2.368994  | h  | 1.899851  | -4.944780  | -2.135385 |
| H  | 3.246341  | -8.900694  | 5.174050  | C                      | -5.188973 | -10.967145 | 2.030836  | h  | -0.539744 | -3.816986  | -1.792587 |
| C  | 2.740633  | -6.445814  | 0.082434  | H                      | -4.944040 | -11.589980 | 2.885228  | h  | -3.317905 | -2.792359  | 2.734623  |
| H  | 3.351868  | -6.612300  | -0.798670 | C                      | -6.287969 | -11.274630 | 1.223003  | h  | -2.465582 | -2.662356  | 5.430129  |

h 0.544001 -6.083722 8.181439  
h 2.284816 -8.024911 7.503722  
h -3.667606 -7.177972 -2.621079  
h -1.273052 -9.372578 0.208773  
h 3.379252 4.856976 -0.359501  
h 0.490977 1.532629 -2.039125

**Conf LM1 –RC**

C 2.404854 4.622947 -7.409706  
H 2.346995 5.704138 -7.561528  
H 3.471597 4.370786 -7.484854  
C 1.740915 3.959821 -8.604425  
O 1.848886 4.486294 -9.734837  
O 1.122180 2.769272 -8.515300  
H 1.114577 2.178908 -7.652638  
C -0.120319 1.898156 -2.068388  
H -0.613051 0.940897 -1.864587  
O -0.151304 2.745443 -0.894958  
H 0.242548 2.278203 -0.129096  
C 1.315999 1.649308 -2.563946  
H 1.859009 1.018924 -1.857186  
H 1.322409 1.123965 -3.527246  
H 1.865867 2.589460 -2.671271  
N -3.955367 -5.194950 4.270939  
H -4.652964 -5.300602 5.000253  
C -2.660996 -4.567977 4.611686  
H -2.100951 -4.331283 3.693704  
C -2.848181 -3.235958 5.385092  
H -3.310653 -3.481333 6.352248  
H -1.845148 -2.874097 5.626181  
N -3.147442 -0.828651 4.686068  
H -2.162546 -0.577781 4.866435  
C -3.631766 -2.133529 4.734343  
C -4.142132 -0.012125 4.224412  
H -4.014272 1.047255 4.079440  
N -5.258681 -0.708440 3.976150  
C -4.931838 -2.035257 4.275398  
H -5.626133 -2.827157 4.090307  
C -1.756434 -5.509960 5.477002  
O -0.976714 -5.010203 6.311745  
S 0.027585 -0.628208 5.279934  
H 2.995210 0.956514 0.342705  
O 2.737881 -0.123682 1.963026  
O 2.181435 0.533016 0.692622  
FE 1.517663 -0.240629 3.380543  
N 1.985081 -2.203314 3.652399  
N -0.051150 -0.735195 2.202670  
N 1.068539 1.725811 3.176566  
N 3.069423 0.222395 4.583698  
C 2.800748 -2.754035 4.634589  
C 2.731393 -4.213905 4.582988  
C 1.893380 -4.535310 3.539502  
C 1.402129 -3.270009 2.995299  
C -0.347017 -2.004251 1.753412  
C -1.578114 -1.985284 0.967200  
C -2.048460 -0.684213 0.962370

C -1.049189 0.100866 1.712949  
C 0.001062 2.240941 2.470536  
C 0.087791 3.698839 2.414830  
C 1.242849 4.066399 3.087160  
C 1.865538 2.810541 3.538161  
C 3.628401 1.482471 4.711808  
C 4.777460 1.431560 5.609866  
C 4.852833 0.138071 6.084746  
C 3.804778 -0.619716 5.408752  
C 3.627721 -2.003704 5.468107  
H 4.231100 -2.548385 6.186769  
C 0.375870 -3.155533 2.063183  
H 0.030137 -4.081820 1.614634  
C -0.981834 1.486073 1.827205  
H -1.691664 2.064390 1.256136  
C 3.096442 2.654639 4.174736  
H 3.729649 3.525921 4.272315  
O -0.377540 -0.248772 -5.240963  
H -0.414754 -0.589430 -4.274724  
H -1.220859 0.210287 -5.482613  
O 1.220493 1.030594 -6.718455  
H 0.597890 0.558583 -6.038295  
H 2.154569 0.826756 -6.508805  
O 1.075495 -1.128937 -1.064938  
H 1.286454 -0.509755 -0.310541  
H 1.811021 -1.768157 -1.133151  
O -0.626764 -1.315468 -2.913065  
H -0.017632 -1.164598 -2.105425  
H -1.553259 -1.537098 -2.660247  
h 0.208064 0.439294 6.135629  
h 3.184896 -4.879866 5.317084  
h 1.568190 -5.514614 3.188387  
h -2.009988 -2.898229 0.557221  
h -2.990583 -0.383110 0.504322  
h -0.661666 4.325602 1.931561  
h 1.550984 5.103495 3.219645  
h 5.444136 2.275131 5.788742  
h 5.515434 -0.270333 6.847788  
h -4.102628 -5.663137 3.399684  
h -1.877056 -6.587068 5.361430  
h 2.084326 4.394993 -6.393161  
h -0.674911 2.402015 -2.859981

**Conf LM1 –TSoo**

C 2.411013 4.609788 -7.414798  
H 2.364948 5.691021 -7.570146  
H 3.475127 4.346751 -7.485854  
C 1.742946 3.949019 -8.608175  
O 1.847815 4.478059 -9.738279  
O 1.125754 2.758437 -8.518694  
H 1.117072 2.165848 -7.654811  
C -0.106039 1.880174 -2.194923  
H -0.580270 0.907240 -2.024202  
O -0.084341 2.654577 -0.976607  
H 0.589993 2.260748 -0.366201  
C 1.305355 1.670810 -2.782756

H 1.882759 0.997620 -2.146718  
H 1.268502 1.228727 -3.786233  
H 1.852435 2.618684 -2.835608  
N -3.953090 -5.196141 4.271416  
H -4.648511 -5.302030 5.002791  
C -2.656067 -4.573212 4.608935  
H -2.099026 -4.336853 3.689021  
C -2.838224 -3.241870 5.384834  
H -3.295307 -3.487911 6.354314  
H -1.833690 -2.880616 5.620848  
N -3.149615 -0.831183 4.700247  
H -2.168394 -0.576157 4.879102  
C -3.626240 -2.139693 4.738958  
C -4.147973 -0.016937 4.241181  
H -4.026320 1.044275 4.104177  
N -5.259020 -0.718488 3.986618  
C -4.925530 -2.045261 4.278443  
H -5.614954 -2.840015 4.089043  
C -1.748900 -5.517825 5.469508  
O -0.957975 -5.019317 6.294542  
S 0.034531 -0.614193 5.272028  
H 2.763629 0.996945 0.335683  
O 2.661048 -0.229776 2.064569  
O 1.797310 1.019476 0.161505  
FE 1.571534 -0.277456 3.340310  
N 1.959315 -2.241101 3.689815  
N -0.033801 -0.787864 2.229804  
N 1.096399 1.684907 3.167420  
N 3.052251 0.211091 4.620436  
C 2.782597 -2.777787 4.673367  
C 2.736098 -4.238054 4.611521  
C 1.913081 -4.568576 3.559062  
C 1.407928 -3.311563 3.015664  
C -0.324470 -2.053208 1.762856  
C -1.555764 -2.030027 0.980823  
C -2.032228 -0.732950 0.996513  
C -1.032315 0.051046 1.742771  
C 0.024331 2.189957 2.459130  
C 0.109351 3.644278 2.387199  
C 1.262045 4.024324 3.055876  
C 1.889315 2.778663 3.519899  
C 3.629266 1.464579 4.727861  
C 4.779123 1.408087 5.618873  
C 4.844157 0.116521 6.102231  
C 3.784525 -0.637011 5.441796  
C 3.602257 -2.020216 5.505760  
H 4.208979 -2.561879 6.223744  
C 0.397188 -3.203078 2.067828  
H 0.067253 -4.126883 1.604027  
C -0.964017 1.433601 1.835937  
H -1.658278 2.001744 1.236795  
C 3.112552 2.631510 4.167452  
H 3.750893 3.500153 4.251557  
O -0.382571 -0.277435 -5.282210  
H -0.419566 -0.627036 -4.313077  
H -1.223594 0.190354 -5.514616

|                     |           |           |           |    |           |           |           |                          |           |           |           |
|---------------------|-----------|-----------|-----------|----|-----------|-----------|-----------|--------------------------|-----------|-----------|-----------|
| O                   | 1.219797  | 1.021802  | -6.723556 | S  | 0.068573  | -0.638963 | 5.290441  | h                        | 2.100743  | 4.392969  | -6.415416 |
| H                   | 0.589711  | 0.532271  | -6.056000 | H  | 1.951584  | 0.634994  | 0.993717  | h                        | -0.713713 | 2.433463  | -3.012336 |
| H                   | 2.152461  | 0.830137  | -6.496111 | O  | 2.655857  | -0.153867 | 2.061303  |                          |           |           |           |
| O                   | 0.985568  | -1.079357 | -1.106100 | O  | 1.352882  | 0.953807  | 0.244845  | <b>Conf LM1 –Heme-OH</b> |           |           |           |
| H                   | 1.227319  | -0.271385 | -0.534145 | FE | 1.644369  | -0.330845 | 3.410044  | C                        | 2.442489  | 4.614491  | -7.454146 |
| H                   | 1.674818  | -1.759309 | -0.994263 | N  | 2.033403  | -2.299714 | 3.744729  | H                        | 2.411260  | 5.695336  | -7.615560 |
| O                   | -0.633239 | -1.358328 | -2.978920 | N  | 0.046706  | -0.875733 | 2.284878  | H                        | 3.502143  | 4.335805  | -7.528182 |
| H                   | -0.009890 | -1.187089 | -2.167444 | N  | 1.163590  | 1.653260  | 3.258790  | C                        | 1.757932  | 3.959976  | -8.641190 |
| H                   | -1.564162 | -1.538685 | -2.713794 | N  | 3.118839  | 0.173992  | 4.691068  | O                        | 1.857103  | 4.489521  | -9.771521 |
| h                   | 0.208679  | 0.448053  | 6.135539  | C  | 2.873131  | -2.828842 | 4.725394  | O                        | 1.132725  | 2.774944  | -8.546494 |
| h                   | 3.194104  | -4.901494 | 5.345103  | C  | 2.820945  | -4.286752 | 4.686989  | H                        | 1.132036  | 2.180802  | -7.682803 |
| h                   | 1.603916  | -5.550253 | 3.200182  | C  | 1.972930  | -4.629626 | 3.657325  | C                        | -0.122393 | 1.939620  | -2.303522 |
| h                   | -1.981762 | -2.935521 | 0.548767  | C  | 1.460214  | -3.381244 | 3.111674  | H                        | -0.601050 | 0.981740  | -2.071189 |
| h                   | -2.979138 | -0.426825 | 0.551862  | C  | -0.287026 | -2.152958 | 1.858576  | O                        | -0.081794 | 2.796558  | -1.138062 |
| h                   | -0.639210 | 4.259072  | 1.887447  | C  | -1.482696 | -2.103618 | 1.023049  | H                        | 0.649736  | 2.469313  | -0.561818 |
| h                   | 1.565358  | 5.063936  | 3.179469  | C  | -1.860585 | -0.778353 | 0.925515  | C                        | 1.285034  | 1.692245  | -2.871369 |
| h                   | 5.452450  | 2.248119  | 5.789297  | C  | -0.840663 | -0.025296 | 1.669830  | H                        | 1.858922  | 1.060180  | -2.190941 |
| h                   | 5.508680  | -0.292098 | 6.863484  | C  | 0.194614  | 2.146766  | 2.430402  | H                        | 1.245846  | 1.183445  | -3.841067 |
| h                   | -4.101993 | -5.663391 | 3.399936  | C  | 0.231102  | 3.603370  | 2.395203  | H                        | 1.832321  | 2.634182  | -2.989675 |
| h                   | -1.877197 | -6.594467 | 5.357934  | C  | 1.291837  | 3.999127  | 3.192468  | N                        | -3.944796 | -5.206613 | 4.275535  |
| h                   | 2.085030  | 4.388215  | -6.398576 | C  | 1.910405  | 2.760784  | 3.685744  | H                        | -4.639229 | -5.309987 | 5.008627  |
| h                   | -0.692892 | 2.411525  | -2.944146 | C  | 3.672824  | 1.431353  | 4.836563  | C                        | -2.637017 | -4.605980 | 4.613915  |
|                     |           |           |           | C  | 4.829789  | 1.374314  | 5.713481  | H                        | -2.082196 | -4.366513 | 3.694169  |
| <b>Conf LM1 –IH</b> |           |           |           | C  | 4.918836  | 0.071387  | 6.161798  | C                        | -2.797426 | -3.275983 | 5.396369  |
| C                   | 2.427245  | 4.607945  | -7.432888 | C  | 3.868251  | -0.678642 | 5.491528  | H                        | -3.248699 | -3.517980 | 6.369511  |
| H                   | 2.390886  | 5.688976  | -7.592211 | C  | 3.694965  | -2.063238 | 5.545011  | H                        | -1.787197 | -2.923626 | 5.621362  |
| H                   | 3.488693  | 4.335255  | -7.504540 | H  | 4.309719  | -2.602988 | 6.257540  | N                        | -3.101662 | -0.864975 | 4.699067  |
| C                   | 1.750108  | 3.950636  | -8.623113 | C  | 0.414192  | -3.296209 | 2.190253  | H                        | -2.116381 | -0.616255 | 4.861349  |
| O                   | 1.851979  | 4.481444  | -9.753295 | H  | 0.078018  | -4.229527 | 1.751409  | C                        | -3.584075 | -2.170378 | 4.755119  |
| O                   | 1.129691  | 2.763450  | -8.531144 | C  | -0.635909 | 1.361264  | 1.615856  | C                        | -4.102669 | -0.050085 | 4.243941  |
| H                   | 1.126769  | 2.164991  | -7.666544 | H  | -1.177410 | 1.908431  | 0.856418  | H                        | -3.980750 | 1.009942  | 4.097321  |
| C                   | -0.122619 | 1.901912  | -2.266597 | C  | 3.121916  | 2.616446  | 4.339453  | N                        | -5.219857 | -0.749139 | 4.008243  |
| H                   | -0.597762 | 0.930050  | -2.089711 | H  | 3.739208  | 3.496497  | 4.461598  | C                        | -4.887935 | -2.074449 | 4.308009  |
| O                   | -0.092641 | 2.685998  | -1.055319 | O  | -0.378311 | -0.281649 | -5.347192 | H                        | -5.579469 | -2.870357 | 4.131486  |
| H                   | 0.587776  | 2.257642  | -0.460957 | H  | -0.439952 | -0.639403 | -4.375891 | C                        | -1.734901 | -5.569490 | 5.458730  |
| C                   | 1.291704  | 1.680890  | -2.837635 | H  | -1.213660 | 0.194893  | -5.584405 | O                        | -0.917358 | -5.091701 | 6.270467  |
| H                   | 1.864850  | 1.036226  | -2.169962 | O  | 1.234664  | 1.032530  | -6.742420 | S                        | 0.109293  | -0.681146 | 5.265248  |
| H                   | 1.261227  | 1.204425  | -3.824990 | H  | 0.598356  | 0.530100  | -6.083580 | H                        | 1.798302  | 0.651639  | 1.023966  |
| H                   | 1.835200  | 2.629106  | -2.918842 | H  | 2.166233  | 0.850464  | -6.503716 | O                        | 2.746825  | -0.192987 | 2.060659  |
| N                   | -3.946473 | -5.203520 | 4.273991  | O  | 0.874842  | -1.046994 | -1.194739 | O                        | 1.049520  | 1.034079  | 0.440080  |
| H                   | -4.641309 | -5.305374 | 5.006882  | H  | 0.985808  | -0.216698 | -0.563164 | FE                       | 1.736221  | -0.384986 | 3.415935  |
| C                   | -2.641354 | -4.596601 | 4.609979  | H  | 1.681311  | -1.593820 | -1.162743 | N                        | 2.100180  | -2.349836 | 3.749767  |
| H                   | -2.087465 | -4.357081 | 3.689089  | O  | -0.686170 | -1.361921 | -3.072045 | N                        | 0.141432  | -0.938160 | 2.260118  |
| C                   | -2.808911 | -3.267235 | 5.392786  | H  | -0.056821 | -1.187331 | -2.246601 | N                        | 1.237270  | 1.619110  | 3.269320  |
| H                   | -3.261867 | -3.512528 | 6.364314  | H  | -1.618140 | -1.532712 | -2.808903 | N                        | 3.176366  | 0.139178  | 4.710247  |
| H                   | -1.800909 | -2.911419 | 5.622161  | h  | 0.216236  | 0.431102  | 6.149221  | C                        | 2.955009  | -2.874730 | 4.716448  |
| N                   | -3.121179 | -0.854289 | 4.707354  | h  | 3.280049  | -4.945392 | 5.424202  | C                        | 2.884920  | -4.329298 | 4.704966  |
| H                   | -2.140660 | -0.598997 | 4.886333  | h  | 1.661408  | -5.615719 | 3.312884  | C                        | 2.001070  | -4.680174 | 3.706157  |
| C                   | -3.597763 | -2.162602 | 4.751744  | h  | -1.947211 | -2.996433 | 0.604511  | C                        | 1.486250  | -3.441191 | 3.152504  |
| C                   | -4.122585 | -0.040799 | 4.250939  | h  | -2.760199 | -0.426249 | 0.420754  | C                        | -0.300069 | -2.227657 | 1.937254  |
| H                   | -4.004416 | 1.020864  | 4.113197  | h  | -0.501008 | 4.201566  | 1.852761  | C                        | -1.507763 | -2.138744 | 1.147841  |
| N                   | -5.234292 | -0.743424 | 4.002391  | h  | 1.556315  | 5.040995  | 3.373104  | C                        | -1.795802 | -0.781863 | 0.985181  |
| C                   | -4.898891 | -2.069291 | 4.295957  | h  | 5.500047  | 2.215071  | 5.892219  | C                        | -0.705726 | -0.086649 | 1.630038  |
| H                   | -5.587198 | -2.865723 | 4.110528  | h  | 5.579215  | -0.337080 | 6.926730  | C                        | 0.297028  | 2.107654  | 2.430179  |
| C                   | -1.734711 | -5.555373 | 5.456405  | h  | -4.100228 | -5.665443 | 3.400516  | C                        | 0.198795  | 3.534951  | 2.500352  |
| O                   | -0.916012 | -5.071677 | 6.263402  | h  | -1.886965 | -6.629263 | 5.348483  | C                        | 1.196569  | 3.957967  | 3.387547  |





H -1.614165 3.252421 8.268798  
C 2.153986 0.251257 9.511404  
O 1.635780 0.234321 10.649177  
S 2.035131 3.874619 3.084943  
H 1.141986 1.504081 -0.965882  
O 2.440325 0.631434 0.219472  
O 1.320952 0.544468 -0.822464  
FE 2.303416 2.181190 1.354449  
N 3.130071 1.099560 2.823529  
N 0.451007 1.558793 1.868253  
N 1.492158 3.304805 -0.140696  
N 4.146583 2.805122 0.852253  
C 4.354082 1.330740 3.423821  
C 4.461020 0.552377 4.657140  
C 3.355273 -0.269718 4.700592  
C 2.494247 0.141154 3.584871  
C 0.192179 0.500807 2.716133  
C -1.249128 0.289366 2.814689  
C -1.867026 1.257798 2.040067  
C -0.774642 2.023590 1.411959  
C 0.141454 3.566133 -0.334924  
C -0.043411 4.438467 -1.492424  
C 1.220089 4.683809 -2.024997  
C 2.174653 3.988869 -1.140175  
C 4.486526 3.485810 -0.304420  
C 5.935319 3.690066 -0.353872  
C 6.456038 3.186550 0.820434  
C 5.326420 2.639758 1.570893  
C 5.387589 2.046663 2.828266  
H 6.336916 2.084879 3.352904  
C 1.149895 -0.196629 3.458770  
H 0.788407 -0.987928 4.107047  
C -0.888395 2.967595 0.392202  
H -1.882476 3.185832 0.031645  
C 3.573343 4.007190 -1.221803  
H 4.016665 4.521248 -2.069636  
O 0.997187 -3.440382 -1.381148  
H 1.623090 -3.104305 -0.648456  
H 0.309642 -2.718535 -1.482439  
O 4.472917 -0.870677 -0.674035  
H 5.338057 -0.729615 -0.248740  
H 3.852216 -0.113566 -0.470923  
O 2.472742 -2.223407 0.372814  
H 2.074398 -1.385355 0.687269  
H 3.360783 -1.959098 -0.006638  
O 1.859119 -4.246958 -3.557124  
H 2.754059 -3.958178 -3.841760  
H 1.548569 -3.901613 -2.606646  
h 2.541590 5.093761 2.683026  
h 5.192520 0.764323 5.436917  
h 3.151491 -1.114570 5.358440  
h -1.670134 -0.461481 3.483305  
h -2.948384 1.372889 1.965998  
h -1.035652 4.762309 -1.806512  
h 1.553760 5.219525 -2.913670  
h 6.458650 4.122188 -1.206786

h 7.498555 3.103268 1.127499  
h -0.541747 -0.671255 7.937906  
h 3.224835 0.099603 9.375941  
h -1.035816 -4.071262 -5.210501  
h -2.571520 -1.752021 -1.376619

### Conf LM3-TSoo

C -1.323246 -5.117260 -4.975372  
H -1.502205 -5.145840 -3.891253  
H -2.266083 -5.375173 -5.467374  
C -0.325729 -6.220239 -5.321950  
O -0.723972 -7.225575 -5.973957  
O 0.912437 -6.123516 -4.872948  
H 1.352750 -5.162415 -4.227244  
C -1.916034 -1.456056 -0.675365  
H -2.084012 -0.392476 -0.455135  
O -0.584942 -1.584562 -1.240943  
H -0.033203 -0.738888 -1.188277  
C -2.020607 -2.291854 0.601295  
H -1.254504 -1.960475 1.304471  
H -3.003520 -2.177255 1.073862  
H -1.859211 -3.355489 0.394774  
N -0.053518 -0.032079 8.532334  
H -0.461581 0.124263 9.439451  
C 1.247379 0.551906 8.298567  
H 1.691512 0.170786 7.374240  
C 1.178838 2.133989 8.190756  
H 0.872421 2.504487 9.175898  
H 2.196715 2.512538 8.015728  
N 0.465434 2.752839 5.809849  
H 1.333873 2.588193 5.318268  
C 0.221016 2.658945 7.180677  
C -0.651774 3.258039 5.204207  
H -0.698566 3.453838 4.148120  
N -1.606418 3.487730 6.109457  
C -1.065108 3.126780 7.344721  
H -1.614493 3.249096 8.263135  
C 2.155575 0.251172 9.508801  
O 1.637199 0.235057 10.646383  
S 2.046979 3.916109 3.063041  
H 0.868903 1.390467 -0.831430  
O 2.681048 0.901610 0.278242  
O 0.871786 0.537910 -1.319220  
FE 2.412410 2.185859 1.337052  
N 3.210427 1.181014 2.871975  
N 0.569621 1.546511 1.871867  
N 1.584992 3.370275 -0.093917  
N 4.229145 2.916571 0.891220  
C 4.437510 1.426464 3.461823  
C 4.558872 0.635310 4.685890  
C 3.467560 -0.205919 4.725752  
C 2.601028 0.191926 3.613420  
C 0.312611 0.484781 2.717322  
C -1.127006 0.279812 2.829032  
C -1.747585 1.259602 2.072356  
C -0.661151 2.024833 1.435934

C 0.236127 3.597000 -0.292479  
C 0.032780 4.448118 -1.465022  
C 1.288679 4.696395 -2.008601  
C 2.254504 4.027030 -1.114787  
C 4.567393 3.545518 -0.292415  
C 6.017678 3.713251 -0.363514  
C 6.536857 3.245344 0.826052  
C 5.405451 2.739692 1.603737  
C 5.465219 2.147800 2.863517  
H 6.417869 2.173050 3.381779  
C 1.273301 -0.194672 3.465880  
H 0.927745 -1.002252 4.101428  
C -0.786814 2.979079 0.430221  
H -1.783425 3.184722 0.070334  
C 3.649525 4.045315 -1.213646  
H 4.082089 4.535196 -2.079889  
O 1.015322 -3.574155 -1.450896  
H 1.657255 -3.165700 -0.767694  
H 0.258359 -2.908812 -1.485108  
O 4.527706 -0.811778 -0.577262  
H 5.372193 -0.811261 -0.090247  
H 3.997207 0.008164 -0.364779  
O 2.394262 -2.124411 0.160226  
H 1.875352 -1.323260 0.363820  
H 3.308255 -1.812560 -0.115493  
O 1.859725 -4.318641 -3.604668  
H 2.744217 -4.014746 -3.906432  
H 1.523325 -3.974342 -2.622015  
h 2.543352 5.149272 2.692543  
h 5.295889 0.840385 5.462303  
h 3.269224 -1.051687 5.384087  
h -1.549360 -0.467750 3.500474  
h -2.828707 1.389220 2.022939  
h -0.966542 4.748900 -1.779590  
h 1.612082 5.215681 -2.910720  
h 6.547421 4.080654 -1.242407  
h 7.581507 3.168915 1.127598  
h -0.541637 -0.670938 7.937716  
h 3.226476 0.099325 9.373966  
h -1.056921 -4.093696 -5.238913  
h -2.625895 -1.813313 -1.421376

### Conf LM3 -IH

C -1.295363 -5.109454 -4.962498  
H -1.477352 -5.132784 -3.878805  
H -2.233033 -5.380880 -5.456394  
C -0.287160 -6.203428 -5.298423  
O -0.662248 -7.216409 -5.946815  
O 0.952213 -6.094021 -4.841771  
H 1.346815 -5.163067 -4.219507  
C -1.932033 -1.448989 -0.670435  
H -2.116963 -0.389197 -0.446018  
O -0.593070 -1.549733 -1.226762  
H -0.130856 -0.651582 -1.268882  
C -2.025075 -2.289797 0.602664  
H -1.276526 -1.936676 1.314321



|    |           |           |           |                         |           |           |           |    |           |           |           |
|----|-----------|-----------|-----------|-------------------------|-----------|-----------|-----------|----|-----------|-----------|-----------|
| H  | -3.015489 | -2.203625 | 1.065274  | H                       | 5.204758  | -0.793729 | 0.110734  | O  | 2.642267  | 0.992955  | 0.006053  |
| H  | -1.831536 | -3.348115 | 0.397262  | H                       | 3.826743  | 0.042274  | -0.183233 | O  | 0.184243  | 1.123811  | -1.131890 |
| N  | -0.053958 | -0.033242 | 8.533857  | O                       | 2.306019  | -2.235508 | 0.385444  | FE | 2.480901  | 2.173233  | 1.217227  |
| H  | -0.464131 | 0.122900  | 9.440062  | H                       | 1.730602  | -1.565590 | 0.792900  | N  | 3.262178  | 1.123329  | 2.755324  |
| C  | 1.246459  | 0.552668  | 8.302899  | H                       | 3.180727  | -1.803464 | 0.120384  | N  | 0.630038  | 1.440899  | 1.709626  |
| H  | 1.690929  | 0.175450  | 7.377022  | O                       | 1.859801  | -4.276677 | -3.569189 | N  | 1.647943  | 3.442001  | -0.181668 |
| C  | 1.174602  | 2.134901  | 8.201907  | H                       | 2.750903  | -3.977730 | -3.853934 | N  | 4.275986  | 2.981745  | 0.826533  |
| H  | 0.864447  | 2.500311  | 9.187772  | H                       | 1.537500  | -3.960319 | -2.594515 | C  | 4.504535  | 1.353714  | 3.329708  |
| H  | 2.191822  | 2.517308  | 8.031321  | h                       | 2.527750  | 5.179664  | 2.718289  | C  | 4.621662  | 0.623557  | 4.583304  |
| N  | 0.462330  | 2.749021  | 5.820612  | h                       | 5.294027  | 0.850294  | 5.444656  | C  | 3.490099  | -0.163007 | 4.690648  |
| H  | 1.330656  | 2.579884  | 5.330849  | h                       | 3.263172  | -1.035488 | 5.365310  | C  | 2.619141  | 0.216560  | 3.585695  |
| C  | 0.217694  | 2.660220  | 7.191588  | h                       | -1.559262 | -0.429205 | 3.503479  | C  | 0.308258  | 0.551953  | 2.745492  |
| C  | -0.653989 | 3.253667  | 5.212975  | h                       | -2.835416 | 1.407552  | 1.996209  | C  | -1.123881 | 0.386844  | 2.806649  |
| H  | -0.700814 | 3.446410  | 4.156428  | h                       | -0.982286 | 4.761873  | -1.785751 | C  | -1.672928 | 1.172713  | 1.784516  |
| N  | -1.608323 | 3.487507  | 6.117299  | h                       | 1.594402  | 5.289297  | -2.890776 | C  | -0.540858 | 1.738824  | 1.089307  |
| C  | -1.067818 | 3.129952  | 7.354073  | h                       | 6.535907  | 4.173148  | -1.218968 | C  | 0.353291  | 3.430245  | -0.569158 |
| H  | -1.617571 | 3.255040  | 8.271848  | h                       | 7.576864  | 3.205460  | 1.128110  | C  | 0.068180  | 4.443190  | -1.544885 |
| C  | 2.154988  | 0.249526  | 9.512068  | h                       | -0.541774 | -0.671275 | 7.938104  | C  | 1.303155  | 5.032497  | -1.868863 |
| O  | 1.637284  | 0.230376  | 10.649892 | h                       | 3.225976  | 0.099649  | 9.375734  | C  | 2.285083  | 4.386975  | -1.000961 |
| S  | 2.030755  | 3.945747  | 3.085428  | h                       | -1.038061 | -4.084923 | -5.231196 | C  | 4.601017  | 3.786941  | -0.259582 |
| H  | 1.362010  | 0.900684  | -0.684465 | h                       | -2.635176 | -1.812155 | -1.419947 | C  | 6.046521  | 3.949116  | -0.334652 |
| O  | 2.551764  | 1.010944  | 0.186577  | <b>Conf LM3-Heme-OH</b> |           |           |           | C  | 6.582755  | 3.322221  | 0.772086  |
| O  | 0.523397  | 0.813279  | -1.314037 | C                       | -1.271286 | -5.099673 | -4.943232 | C  | 5.463392  | 2.730892  | 1.494493  |
| FE | 2.404048  | 2.256013  | 1.345523  | H                       | -1.452183 | -5.116698 | -3.859193 | C  | 5.536422  | 2.059132  | 2.716012  |
| N  | 3.208219  | 1.201571  | 2.852990  | H                       | -2.205499 | -5.385796 | -5.434916 | H  | 6.496110  | 2.059320  | 3.222374  |
| N  | 0.562132  | 1.593962  | 1.889759  | C                       | -0.249288 | -6.180979 | -5.273051 | C  | 1.253908  | -0.071308 | 3.546244  |
| N  | 1.581669  | 3.477580  | -0.051893 | O                       | -0.602884 | -7.204025 | -5.914132 | H  | 0.885130  | -0.790808 | 4.270803  |
| N  | 4.223608  | 2.969427  | 0.897795  | O                       | 0.990703  | -6.050325 | -4.814243 | C  | -0.462346 | 2.214195  | -0.318683 |
| C  | 4.437834  | 1.440935  | 3.445397  | H                       | 1.349283  | -5.129842 | -4.206659 | H  | -1.443225 | 2.305382  | -0.776128 |
| C  | 4.558281  | 0.647006  | 4.666569  | C                       | -1.945837 | -1.478817 | -0.645739 | C  | 3.678396  | 4.466843  | -1.051961 |
| C  | 3.464173  | -0.191421 | 4.705601  | H                       | -2.240931 | -0.490031 | -0.275391 | H  | 4.104215  | 5.121210  | -1.806473 |
| C  | 2.597134  | 0.213311  | 3.598031  | O                       | -0.635625 | -1.342520 | -1.263952 | O  | 0.947456  | -3.402736 | -1.398048 |
| C  | 0.304401  | 0.524696  | 2.725591  | H                       | -0.326019 | -0.381341 | -1.272824 | H  | 1.524630  | -3.124852 | -0.605951 |
| C  | -1.135541 | 0.313277  | 2.827278  | C                       | -1.864471 | -2.459715 | 0.525366  | H  | 0.279479  | -2.656800 | -1.488369 |
| C  | -1.754106 | 1.285550  | 2.059056  | H                       | -1.231903 | -2.033358 | 1.309318  | O  | 4.318032  | -1.001026 | -0.262283 |
| C  | -0.664609 | 2.055040  | 1.432681  | H                       | -2.854541 | -2.662916 | 0.949061  | H  | 5.176793  | -0.973701 | 0.197021  |
| C  | 0.236239  | 3.645213  | -0.281076 | H                       | -1.426803 | -3.410857 | 0.205469  | H  | 3.852168  | -0.111789 | -0.236027 |
| C  | 0.020937  | 4.486903  | -1.460170 | N                       | -0.056764 | -0.029269 | 8.532819  | O  | 2.220844  | -2.290128 | 0.559271  |
| C  | 1.273921  | 4.767857  | -1.988856 | H                       | -0.467071 | 0.124335  | 9.439476  | H  | 1.653977  | -1.600735 | 0.946040  |
| C  | 2.246458  | 4.129731  | -1.075206 | C                       | 1.241807  | 0.560729  | 8.303167  | H  | 3.109570  | -1.887889 | 0.291078  |
| C  | 4.559450  | 3.627461  | -0.271220 | H                       | 1.687601  | 0.184492  | 7.378413  | O  | 1.861416  | -4.208321 | -3.543188 |
| C  | 6.008790  | 3.789886  | -0.345284 | C                       | 1.168406  | 2.142412  | 8.195755  | H  | 2.761505  | -3.925999 | -3.815061 |
| C  | 6.531706  | 3.292149  | 0.831132  | H                       | 0.852678  | 2.512599  | 9.177995  | H  | 1.529216  | -3.856223 | -2.598083 |
| C  | 5.403087  | 2.774397  | 1.601755  | H                       | 2.186081  | 2.524889  | 8.028432  | h  | 2.537327  | 5.094680  | 2.688283  |
| C  | 5.465855  | 2.165018  | 2.852920  | N                       | 0.461704  | 2.733150  | 5.804941  | h  | 5.360398  | 0.850993  | 5.351816  |
| H  | 6.419570  | 2.183683  | 3.369610  | H                       | 1.329370  | 2.558290  | 5.315213  | h  | 3.289739  | -0.979719 | 5.384119  |
| C  | 1.266153  | -0.167360 | 3.460241  | C                       | 0.215702  | 2.659708  | 7.176989  | h  | -1.608911 | -0.216098 | 3.574291  |
| H  | 0.920457  | -0.975547 | 4.095157  | C                       | -0.656530 | 3.225177  | 5.189681  | h  | -2.739306 | 1.323404  | 1.616595  |
| C  | -0.784559 | 3.000017  | 0.417814  | H                       | -0.703088 | 3.399883  | 4.129622  | h  | -0.957488 | 4.663392  | -1.840830 |
| H  | -1.777422 | 3.171736  | 0.030735  | N                       | -1.612760 | 3.466564  | 6.090773  | h  | 1.583175  | 5.749484  | -2.640605 |
| C  | 3.640291  | 4.153423  | -1.176906 | C                       | -1.071574 | 3.126725  | 7.332302  | h  | 6.566850  | 4.388860  | -1.185503 |
| H  | 4.070760  | 4.650461  | -2.039685 | H                       | -1.622901 | 3.260491  | 8.247945  | h  | 7.627973  | 3.224614  | 1.065441  |
| O  | 0.993774  | -3.570285 | -1.388906 | C                       | 2.152327  | 0.258404  | 9.511057  | h  | -0.542333 | -0.669943 | 7.938066  |
| H  | 1.606605  | -3.215346 | -0.657215 | O                       | 1.635739  | 0.233093  | 10.649090 | h  | 3.223428  | 0.112052  | 9.371813  |
| H  | 0.261132  | -2.882402 | -1.440750 | S                       | 2.062470  | 3.841649  | 3.018087  | h  | -1.024369 | -4.074637 | -5.219637 |
| O  | 4.343075  | -0.807447 | -0.343530 | H                       | 1.144586  | 1.038475  | -0.821251 | h  | -2.645781 | -1.831632 | -1.403147 |
